# Supplementary material for: Global prevalence of burnout among postgraduate medical trainees: a systematic review and meta-regression
Source: PubMed Central journal article supplement — CMAJ Open. 2021 Mar 8;9(1):E189–200. doi: 10.9778/cmajo.20200068 (PMC8034324; doi:10.9778/cmajo.20200068), 2021-03-08
Supplement: supp_9.1.E189_2020-0068-Original-submission.pdf [file supp_9.1.E189_2020-0068-Original-submission.pdf]

1  
2  
3 **Prevalence of resident burnout remains unchanged worldwide despite efforts in the last 20**  
4 **years: are we missing the point? A systematic review and meta-regression**  
5

6 Leen Naji, MD<sup>1,2</sup>, Brendan Singh, MD<sup>1</sup>, Ajay Shah, BSc<sup>3</sup>, Faysal Naji, MD<sup>4</sup>, Brittany Dennis,  
7 MD, PhD<sup>5</sup>, Owen Kavanagh, MD<sup>1</sup>, Laura Banfield, MLIS<sup>6</sup>, Akram Alyass, PhD<sup>2</sup>, Fahad Razak,  
8 MD, PhD<sup>7</sup>, Zainab Samaan, MBChB, PhD<sup>2,8</sup>, Jason Profetto, MD<sup>1</sup>, Lehana Thabane, PhD<sup>2,9</sup>, and  
9 Zahra N. Sohani, MD, PhD<sup>10, 11</sup>  
10  
11

12 <sup>1</sup> Department of Family Medicine, McMaster University, Hamilton, ON, Canada

13 <sup>2</sup> Department of Health Research, Methods, Evidence, and Impact, McMaster University,  
14 Hamilton, ON, Canada

15 <sup>3</sup> Michael G. DeGroot School of Medicine, McMaster University, Hamilton, ON, Canada

16 <sup>4</sup> Department of Vascular Surgery, McMaster University, Hamilton, ON, Canada

17 <sup>5</sup> Department of Medicine, McMaster University, Hamilton, ON, Canada

18 <sup>6</sup> Health Sciences Library, McMaster University, Hamilton, ON, Canada

19 <sup>7</sup> Li Ka Shing Knowledge Institute, St. Michael's Hospital, Toronto, ON, Canada

20 <sup>8</sup> Department of Psychiatry and Behavioural Neurosciences, McMaster University, Hamilton,  
21 ON, Canada

22 <sup>9</sup> Biostatistics Unit, St Joseph's Healthcare—Hamilton, Hamilton, ON, Canada

23 <sup>10</sup> Faculty of Medicine, University of Toronto, Toronto, ON, Canada

24 <sup>11</sup> Department of Internal Medicine, McGill University, Montreal, QC, Canada  
25  
26  
27  
28  
29

30 **Corresponding Authors:**

31 Dr. Lehana Thabane

32 Professor/Associate Chair, Department of Health Research Methods, Evidence, and Impact  
33 Biostatistics Unit

34 Email: thabanl@mcmaster.ca

35 St Joseph's Healthcare Hamilton. 50 Charlton Avenue East. 3rd Floor Martha Wing, Room  
36 H325. Hamilton, Ontario L8N 4A6  
37  
38

39 Dr. Zahra Sohani

40 Resident Physician, Internal Medicine

41 Email: zahra.sohani@mail.mcgill.ca

42 Address: Department of Internal Medicine. McGill University. 3605 Rue de la Montagne.  
43 Montréal, QC H3G 2M1  
44  
45

46 **Funding support:** The authors were not funded for this work.

47 **Competing interest's declaration:** The authors report no conflicts of interest.  
48

49 Abstract word count: 250

50 Manuscript word Count: 2905  
51  
52  
53  
54  
55  
56  
57  
58  
59  
60

## ABSTRACT

**Background:** Burnout is increasingly recognized as a crisis in the medical profession. Resident physicians are a particularly susceptible group.

**Objectives:** We aimed to establish the global prevalence of burnout among medical residents. Secondly, we used this data to: 1) identify risk and protective factors for burnout, and 2) use meta-regression to establish whether prevalence of burnout varies by country of training, year of study, and specialty of practice.

**Methodology:** We searched Medline, EMBASE, PsycINFO, Cochrane, Web of Science and ERIC from their inception to August 21, 2018. Reviewers screened 8,505 studies in duplicates, rendering 197 studies that quantify burnout among resident physicians. Study data were extracted in duplicate by five investigators. Pooled prevalence was estimated using a random effects model with restricted maximum-likelihood estimator. A random effects meta-regression was employed for our secondary analysis.

**Results:** Our study encompasses data over 30 years among 44,000 residents across 47 countries. We report a pooled prevalence of 47.3% (95% CI 43.1%; 51.5%). A majority of studies found depression, stress, and lower job satisfaction to be associated with higher rates of burnout. Our meta-regression uncovered three novel findings: despite changes in duty hours and a focus on wellness, the prevalence of burnout has remained unchanged over the past 2 decades. Burnout varies by region, with residents of European countries experiencing the lowest level. Lastly, burnout was unaffected by specialty of practice.

**Interpretation:** Approximately 1 in 2 residents reported experiencing burnout. This prevalence has not changed over decades and may be modulated by systemic factors.

Registration: Prospero, CRD42018108774

## INTRODUCTION

We are in a critical period within the medical profession as the alarming rates of suicide brings burnout to the forefront.<sup>1-3</sup> The effects of burnout are widespread, impacting both physician wellness and productivity as well as patient health outcomes.<sup>2,4</sup> Burnout is characterized by physical, emotional, and mental exhaustion, resulting from long term involvement in emotionally taxing situations.<sup>5</sup>

In the United States, approximately half of practicing physicians suffer from an episode of burnout during their career.<sup>1,6,7</sup> Canadian data reports a slightly lower prevalence; approximately 30% of the surveyed physicians endorsed burnout.<sup>8</sup> Residency is a particularly stressful time; the junior physician is tasked with a tremendous responsibility of consistently providing high quality care while learning and integrating new skills. Adapting to these job demands have a direct consequence on one's emotional and intellectual reserve, and ability to establish a healthy home-work interface.<sup>9</sup> Prevalence of burnout among resident physicians vary extensively from 3 to 88 percent, but there is no existing systematic investigation of burnout in this group.<sup>7,10</sup>

The objective of our study was two-fold; our main aim was to establish the prevalence of burnout among medical residents based on a meta-analysis of global literature. Secondly, we used the extracted data to: 1) explore which commonly studied factors, such as age, sex, and marital status, increase risk for burnout, and 2) use meta-regression to understand whether country of training, year of study, and specialty of training were associated with burnout as these factors may explain heterogeneity in the prevalence of burnout.

## METHODS

### Data Sources and Searches

The search strategy was developed and conducted by a health research librarian (L.B.) at McMaster University. We searched Medline, EMBASE, PsycINFO, Cochrane, Web of Science and ERIC (Education Resources Information Center) from their inception to August 21, 2018. The search encompassed terms used to refer to residents worldwide (e.g., intern, junior physician, house officer, et cetera), burnout and its components (emotional exhaustion, physical exhaustion, depersonalization, cynicism), and the setting (medical, hospital, clinical). The reference lists of reviews identified were searched for relevant articles. No restrictions on geography or date were applied. However, we limited our search to studies published in English. The full search strategy is provided in Supplementary Table 1.

### Study Selection

All studies measuring burnout among residents were included regardless of country of training, specialty, year of training, or setting. We accepted the definition of burnout as used in the study, recognizing that it is measured and defined variably across the literature. We included studies that either reported or provided data necessary to quantify burnout such as through the prevalence of burnout, residents' scores on a burnout scale or their classifications into percentiles based on score. Studies investigating doctors of osteopath were excluded, as were case studies, dissertations, and opinion papers. All titles, abstracts, and full-text articles were evaluated for

1  
2  
3 eligibility in duplicate by five reviewers using the Covidence software.<sup>11</sup> Any discrepancies were  
4 discussed and resolved by an independent reviewer when necessary. In addition, we reviewed the  
5 reference list of each identified study. Supplementary Figure 1 outlines the selection of articles.  
6  
7

## 8 **Data Extraction and Quality Assessment**

9 From each study, we extracted study characteristics, participant demographics, definition  
10 and measurement of burnout, burnout rates, and factors associated with burnout. Definitions for  
11 the following extracted associated factors were accepted as they were reported by study authors:  
12 depression, job satisfaction, and income satisfaction. As before, data was independently  
13 extracted in duplicate and discrepancies were resolved by an independent reviewer. There is a  
14 lack of a validated tool to assess risk of bias in cross sectional studies prohibiting us from doing  
15 so systematically. However, using the general framework of well-established tools the same  
16 reviewers also independently rated the quality of included studies in duplicate based on  
17 representativeness of the sample, sample size, ascertainment of outcome and reporting of  
18 findings.  
19  
20

## 21 **Statistical Analyses**

### 22 *Primary Analysis*

23  
24  
25  
26 A pooled prevalence was calculated using a random effects model with a restricted  
27 maximum-likelihood estimator. We used raw proportions without transforming the data based on  
28 recommendations by Lipsey and Wilson since a vast majority of our proportions were between  
29 0.2 and 0.8.<sup>12</sup> The meta-analysis was conducted in R using the metafor package.<sup>13</sup>  
30

31 As we anticipated systematic differences between the results of studies (heterogeneity),  
32 we report both the tau<sup>2</sup> values of heterogeneity and calculated I<sup>2</sup>. We sought to understand  
33 whether prevalence of burnout changed depending on the tool used to ascertain the prevalence.  
34 Therefore, we conducted a meta-regression analysis with the use of MBI, a validated tool, as a  
35 categorical moderator variable (yes vs no). We hypothesized that since use of MBI decreases  
36 heterogeneity in how burnout is defined, it will be a significant predictor in our meta-  
37 regression.<sup>14,15</sup> If found to be a significant variable, we intended to adjust all additional analyses  
38 for the use of MBI.  
39

40 We conducted a subgroup analysis of only North American studies to establish a pooled  
41 estimate of burnout among North American residents. As before, we employed a random effects  
42 model to pool data.  
43  
44

### 45 *Secondary Analysis*

46  
47 We conducted two secondary analyses. First, we extracted data on reported risk and  
48 protective factors, including age, sex, marital status, depression, level of stress, work hours,  
49 frequency of call shifts, job satisfaction, wage/income satisfaction, family/network support,  
50 sleep, and level of training. We present a descriptive summary of associations found for these  
51 factors in the literature. Second, we employed meta-regression to explore factors that may  
52 explain variation in burnout; specifically, we studied the year burnout data was collected  
53 (continuous variable), the region (categorical variable), and program of residency (medicine vs  
54 surgery). We first categorized regions as continents, but as only a handful of studies were  
55  
56  
57  
58  
59  
60

1  
2  
3 conducted in Africa, Asia, Australia, Middle East, and South America, we collapsed these  
4 regions into one and compared them against Europe and North America, which were  
5 appropriately powered. We used the Comprehensive Meta-Analysis software (version 3) to  
6 conduct our analysis. A random effects model was used to conduct the meta-regression. Due to  
7 the post-hoc nature of this analysis, we did not take a significant finding to be definitive, but  
8 rather to promote a direction for future research.  
9

10  
11 We followed the Preferred Reporting Items for Systematic Reviews and Meta-Analyses  
12 (PRISMA) reporting guidelines.<sup>20</sup>  
13

## 14 **RESULTS**

### 15 **Study characteristics**

16  
17 Upon completion of screening, 197 of the 8,505 studies published between 1987 and  
18 2018 met our eligibility criteria. These studies represent data from over 44,000 residents across  
19 47 countries; a large proportion of studies (82/197), notably, were conducted in the United  
20 States. Residents included were from a variety of programs and at different levels of training. An  
21 overall proportion of burnout was reported in 114 studies. Four of these 114 studies report  
22 burnout in two separate populations of residents rendering 118 datasets eligible for our meta-  
23 analysis (Table 1).  
24  
25

### 26 **Measurement of burnout**

27  
28 Among the studies included in our review, burnout was measured using a variety of tools,  
29 detailed in Supplementary Table 2. The most commonly utilized tool is the MBI (138 of 197  
30 studies), in which burnout is assessed in the context of EE, DP, and PA. This is a 22-item self-  
31 administered questionnaire whereby respondents are asked to rank their responses on a 7-point  
32 Likert scale (ranging from 0 to 6, or less commonly, 1-7). While the MBI was initially created to  
33 assess burnout on a continuum, it has commonly been adapted to dichotomize burnout.<sup>18</sup>  
34 However, there is a lack of standardization regarding which of the three dimensions are  
35 necessary to constitute burnout or specific cut-off values for each of these dimensions.<sup>2</sup> For  
36 instance, amongst the 138 studies that used MBI, 83 studies reported an overall proportion of  
37 residents experiencing burnout. These studies defined burnout using 9 different definitions, with  
38 the most common one being a high score in either EE or DP (N=42/83). Five of 83 studies did  
39 not report how overall burnout was determined. The cutoff values for the individual dimensions  
40 also varied, as described in Supplementary Table 2. For instance, six different cut offs were used  
41 to define high EE, meanwhile 24 of 83 studies did not report a cutoff.  
42  
43  
44

45  
46 Twenty-nine of 197 studies utilized a modified single-item version of the MBI to  
47 measure burnout.<sup>19</sup> Thirty-one of 197 studies used a different tool altogether as described in  
48 Supplementary Table 2. This lack of an established quantitative definition for burnout likely  
49 contributes to heterogeneity in prevalence estimates; as such, the pooled results are crude  
50 estimates and should be interpreted with caution.  
51

### 52 **Pooled prevalence of burnout**

53  
54  
55  
56  
57  
58  
59  
60

1  
2  
3  
4  
5  
6  
7  
8  
9  
10  
11  
12  
13  
14  
15  
**Global:** Overall, 31,210 residents from 114 studies, consisting of 118 datasets, were included in our meta-analysis. The pooled random effects estimate of burnout was 47.3% (95% CI: 43.1%-51.5%) between 2001 and 2017. An analysis of heterogeneity suggests significant differences among the pooled studies;  $\tau^2$  was 0.052 ( $P_{het} < 10^{-16}$ ) and  $I^2$  was 98.56%. A forest plot of all studies is presented in Figure 1. We then sought to understand whether capturing burnout in a standardized manner using the MBI would explain heterogeneity in prevalence. We thus conducted a meta-regression analysis with MBI use as a categorical variable. As expected, use of MBI to capture burnout significantly explained heterogeneity in the prevalence (meta regression  $\beta$  0.117, 95% CI: 0.027;0.207,  $P = 0.01$ ). We therefore adjusted our future analyses for use of MBI.

16  
17  
18  
19  
20  
21  
22  
23  
**North America:** We aimed to estimate prevalence of burnout among Canadian residents, however only four studies captured burnout among Canadians ( $n=752$ ), therefore, we assessed all North American studies together. Sixty studies captured North American data; the pooled random effects estimate of burnout among North American residents was 51.2% (95% CI: 45.9, 56.6). We further explored regional variation in burnout globally, results of this analysis are presented below.

### 24 25 26 27 28 29 30 31 32 33 34 35 36 37 38 **Risk and protective factors**

We aimed to study the following factors and their role on burnout: age, sex, marital status, depression, level of stress, work hours, frequency of call shifts, job satisfaction, wage/income satisfaction, family/network support, sleep, and level of training. However, due to heterogeneity in how these factors are studied and reported in literature, we were unable to pool results but rather present a descriptive analysis of our findings (Figure 2). In brief, we found that a majority of studies did not find a significant association between age, sex, relationship status, and level of training, with burnout. On the other hand, depression, stress, and lower job satisfaction were commonly associated with higher rates of burnout in the literature. Additionally, while 28/58 studies investigating the association between work hours and burnout found a positive association, 30/58 studies concluded otherwise. Similarly, only 7/23 studies found that burnout was positively and significantly associated with more call shifts.

### 39 40 41 42 43 44 45 46 47 48 **Meta-regression**

**Year of study:** We undertook a meta-regression of burnout with the year in which a study was conducted to evaluate whether heterogeneity in the prevalence of burnout was explained by time, i.e. whether burnout changed over time. Data for this analysis were available for 100 studies; 14 did not report the year of survey. Our analysis, adjusted for MBI use, found that year of study was not a significant moderator of burnout (estimate of meta regression  $\beta$  0.002, 95% CI: -0.009;0.013,  $P = 0.717$ ). Burnout prevalence over the years is presented in Figure 3.

49  
50  
51  
52  
53  
54  
55  
56  
57  
58  
59  
60  
**Medical versus Surgical training:** We additionally investigated whether prevalence of burnout was impacted by specialty; specifically, we were interested in understanding whether medical residents experienced lower burnout rates compared to surgical residents. Data were available for 82 studies. Our meta-regression analysis, adjusted for MBI use, showed no evidence that specialty of training was associated with burnout prevalence (estimate of meta regression  $\beta$  -0.005, 95% CI: -0.110;0.099,  $P = 0.924$ ).

1  
2  
3  
4  
5 **Geographic region:** We anticipated that geographic region of study would be an  
6 important predictor of burnout prevalence. We first categorized regions by continents (Europe,  
7 Africa, Asia, Middle East/North Africa, North America, South America, and Australia/New  
8 Zealand), however, a vast majority of these regions included only a few studies, therefore we  
9 collapsed Africa, Asia, Australia, Middle East, and South America in to one category, and  
10 conducted an analysis with region as a three category variable (North America, Europe, and Rest  
11 of the World). Data from all 118 datasets were available for this analysis. Figure 4 illustrates  
12 burnout prevalence by region. Our analysis, adjusted for MBI use, found that region was a  
13 significant predictor of variation in burnout prevalence (estimate of meta regression  $P = 0.0002$ ).  
14 The prevalence of burnout among European residents was 30.8%. By contrast, 51.2% of North  
15 American residents experienced burnout. Table 2 present the results of our meta-analysis of  
16 burnout prevalence by region.  
17  
18

### 19 **Risk of Bias Assessment**

20 Many of the included studies had methodological flaws limiting the reliability of their  
21 findings. Specifically, only 30% (60/197) of studies included a consecutive or obviously  
22 representative sample of residents, and 10% (19/197) of studies justified their sample size using  
23 a sample size calculation. Additionally, only 25% (50/197) of studies compared respondents'  
24 characteristics to those of non-respondents or had a satisfactory response rate of greater than  
25 80%. While 98% (193/197) of studies used a well-described validated tool to measure burnout,  
26 this is of doubtful significance given the heterogeneity in interpreting the tool and establishing  
27 cutoff values highlighted above. Forty-five percent of studies (88/197) appropriately reported on  
28 descriptive statistics to describe the population with proper measures of dispersion. Lastly, 49%  
29 (97/197) of studies provided adequate statistics to describe burnout with proper measures of  
30 dispersion.  
31  
32  
33

### 34 **INTEPRETATION**

35  
36  
37 Our study encompasses data collected over 30 years among 44,000 resident physicians  
38 across 47 countries. We report a global pooled estimate of burnout of 47.3%. Our assessment of  
39 the literature reveals that contrary to common belief, the majority of literature does not support  
40 an association between relationship status, work hours, or level of training with burnout. We  
41 report three novel findings: we found that there is significant variation in burnout around the  
42 world, with North American residents experiencing more burnout than Europeans. Second, the  
43 prevalence of burnout has not changed over time. And lastly, we found that medical and surgical  
44 residents experience similar levels of burnout. We outline below how these key findings will  
45 assist policy makers in targeting future interventions for mitigating burnout.  
46  
47

48 Residency programs, over the past decades, have introduced policies to circumvent  
49 burnout by limiting work hours, on-call responsibilities, and instituting wellness programs.  
50 However, our data shows that the prevalence has not significantly changed over the last two  
51 decades.<sup>20</sup> This is consistent with the equivocal findings of a recent systematic review.<sup>21</sup> These  
52 results call to light the probability that additional, yet not understood, causes exist for burnout.  
53 Further results of our analysis, instead, sheds light on these unknown causes. Our meta-  
54 regression showed that prevalence of burnout varied significantly by region of the world.  
55  
56  
57  
58  
59  
60

1  
2  
3 Amongst North American and European residents, the two most studied populations, there exists  
4 a stark difference in the rates of burnout. While there is a paucity of research comparing health  
5 care systems between these regions, a study of general workplace trends finds that factors such  
6 as more involved unions and longer paid vacations, among other such social policies, contribute  
7 to overall improved work-life balance and less burnout.<sup>22</sup> It is possible that our findings may be  
8 biased by methodological considerations such as the fact that MBI may be filled out in a  
9 different manner across cultures contributing to the variation between regions; our findings are  
10 nonetheless novel and warrant future research to identify differences in the training culture and  
11 environment between regions that may explain our results. In fact, several studies support this  
12 hypothesis; a systematic review by Panagioti *et al.*, evaluating strategies to mitigate burnout  
13 suggested the need for organizational level change.<sup>4</sup>  
14  
15

16  
17 The need for systemic change is further emphasized by our finding that specialty of  
18 training does not affect burnout rates. This finding should support alliance of efforts, both policy  
19 and research, by medical and surgical training programs for a crisis that affects all residents  
20 equally. Ultimately, our study highlights that we do not yet have a grasp on what factors cause  
21 burnout among physicians; it is critical that we amend research efforts to better understand  
22 burnout so that appropriate interventions can be developed to alleviate this crisis.  
23  
24

### 25 **Strengths and Limitations**

26  
27 Our large systematic review evaluates burnout among resident physicians on a global  
28 scale; we employed broad search terms to capture data from a sample of 44,000 residents across  
29 47 countries. The comprehensiveness of our data make our results generalizable and provides a  
30 solid platform on which additional data can be added to make more robust conclusions. Our  
31 results also propose a clear novel direction of research; our study suggests that the key to  
32 mitigating burnout may lie in systemic changes that can be uncovered by studying regional  
33 variation in the medical culture.  
34  
35

36  
37 There are multiple limitations to our study. First, there is significant heterogeneity in the  
38 measurement of burnout, subsequently leading to pooled estimates that are less reliable. It is  
39 worth noting that use of MBI to define burnout explained some heterogeneity and we  
40 subsequently adjusted our meta-regression accordingly to ensure robustness of our findings. We  
41 nonetheless encourage readers to assess the results critically. The bias resulting from substantial  
42 heterogeneity is a limitation that exists in literature and highlights the need for standardized  
43 measurement of burnout.  
44  
45

### 46 **Conclusions**

47  
48 We present data on the epidemic of resident physician burnout affecting 1 in 2 residents  
49 worldwide. Despite its significant impact, there remains a lack of consensus surrounding the  
50 definition and measurement of burnout and interventions have thus far been largely  
51 inconsequential since burnout prevalence appears unchanged over the last few decades. We  
52 provide a novel and more comprehensive characterization of burnout within our profession and a  
53 new direction for future research.  
54  
55  
56  
57  
58  
59  
60



1  
2  
3  
4 **Author contributions:** LN, ZS, BS and JP conceived the research question. LN, BS, BD, ZS,  
5 and LT designed the review protocol. LN and LB designed the search strategy, which was  
6 completed by LB. LN, BS, AS, FN and OK completed the systematic screening of studies for  
7 inclusion independently and in duplicate. LN, BS, AS, FN and OK performed data extraction and  
8 quality assessment of included studies independently and in duplicate. LN, AA, and ZS  
9 performed data analyses. All authors contributed to the writing and revision of the manuscript.  
10 All authors approved the final version of the manuscript. The corresponding author attests that  
11 all listed authors meet authorship criteria and that no others meeting the criteria have been  
12 omitted. LN and ZS accept full responsibility for the finished article, had access to any data, and  
13 controlled the decision to publish.  
14  
15  
16  
17  
18  
19  
20  
21  
22  
23  
24  
25  
26  
27  
28  
29  
30  
31  
32  
33  
34  
35  
36  
37  
38  
39  
40  
41  
42  
43  
44  
45  
46  
47  
48  
49  
50  
51  
52  
53  
54  
55  
56  
57  
58  
59  
60

Confidential

1  
2  
3  
4  
5  
6  
7  
8  
9  
10  
11  
12  
13  
14  
15  
16  
17  
18  
19  
20  
21  
22  
23  
24  
25  
26  
27  
28  
29  
30  
31  
32  
33  
34  
35  
36  
37  
38  
39  
40  
41  
42  
43  
44  
45  
46  
47

**Table 1** Characteristics of the 114 studies include in the meta-analysis

| Author                                   | Country              | N Residents | Males (%)  | Specialty                 | Year of Survey | Experiencing Burnout (%) | Tool used to Measure Burnout |
|------------------------------------------|----------------------|-------------|------------|---------------------------|----------------|--------------------------|------------------------------|
| Abdulrahman et al, 2018 <sup>23</sup>    | United Arab Emirates | 302         | 63 (21.0)  | Multiple                  | 2016           | 70.20%                   | MBI                          |
| Agha et al, 2015 <sup>10</sup>           | Saudi Arabia         | 96          | 64 (67)    | Multiple                  | NS             | 88.54%                   | MBI                          |
| Aksoy et al, 2014 <sup>24</sup>          | Turkey               | 28          | 10 (47)    | Pediatrics                | NS             | 27.27%                   | MBI                          |
| Aksoy et al, 2014 <sup>24</sup>          | Turkey               | 38          | 16 (47)    | Internal Medicine         | NS             | 33.33%                   | MBI                          |
| Al-Ma'mari et al, 2016 <sup>25</sup>     | Canada               | 143         | 19 (13.0)  | Obstetrics and Gynecology | NS             | 73.70%                   | MBI                          |
| Aldrees et al, 2013 <sup>26</sup>        | Saudi Arabia         | 159         | NR         | Multiple                  | 2010           | 86.00%                   | MBI                          |
| Aldrees et al, 2015 <sup>27</sup>        | Saudi Arabia         | 85          | 57 (67)    | Otolaryngology            | 2013           | 45.00%                   | MBI                          |
| Aldrees et al, 2017 <sup>28</sup>        | Saudi Arabia         | 38          | 28 (74)    | Plastic Surgery           | 2015           | 47.00%                   | MBI                          |
| Arora et al, 2014 <sup>29</sup>          | Australia            | 51          | NR         | Orthopedic Surgery        | 2012           | 53.00%                   | MBI                          |
| Ashkar et al, 2010 <sup>30</sup>         | Lebanon              | 155         | 86 (55.5)  | Multiple                  | 2008           | 80.00%                   | MBI                          |
| Attenello et al, 2018 <sup>31</sup>      | USA                  | 346         | 270 (78.0) | Neurosurgery              | 2015           | 67.00%                   | MBI                          |
| Becker et al, 2006 <sup>32</sup>         | USA                  | 118         | 25 (20.8)  | Obstetrics and Gynecology | 2004           | 21.00%                   | MBI                          |
| Billings et al, 2011 <sup>33</sup>       | USA                  | 284         | 131 (46.0) | Internal Medicine         | 2008 to 2010   | 45.00%                   | MBI                          |
| Blanchard et al, 2010 <sup>15</sup>      | France               | 204         | 82 (40.0)  | Oncology                  | 2009           | 44.00%                   | MBI                          |
| Bogg et al, 2001 <sup>34</sup>           | England              | 56          | NR         | Multiple                  | NS             | 25.00%                   | MBI                          |
| Braun et al, 2017 <sup>35</sup>          | USA                  | 32          | 25 (79)    | Internal Medicine         | 2014           | 50.00%                   | MBI                          |
| Campbell et al, 2010 <sup>36</sup>       | USA                  | 86          | 44 (51)    | Internal Medicine         | 2003 to 2008   | 67.00%                   | MBI                          |
| Castelo-Branco et al, 2007 <sup>37</sup> | Spain                | 109         | 15 (14.0)  | Obstetrics and Gynecology | 2004           | 58.00%                   | MBI                          |
| Chaput et al, 2015 <sup>38</sup>         | France               | 52          | 26 (50)    | Plastic surgery           | 2013           | 28.80%                   | MBI                          |
| Chati et al, 2017 <sup>39</sup>          | France               | 251         | 144 (57.5) | General Surgery           | 2013           | 52.00%                   | MBI                          |
| Chaukos et al, 2017 <sup>40</sup>        | USA                  | 54          | 21 (40)    | Internal Medicine         | NS             | 31.00%                   | MBI                          |
| Chaukos et al, 2017 <sup>40</sup>        | USA                  | 14          | 6 (40)     | Psychiatry                | NS             | 14.00%                   | MBI                          |
| Cofer et al, 2018 <sup>41</sup>          | USA                  | 40          | 27 (68)    | General Surgery           | 2016           | 25.00%                   | MBI                          |
| Cubero et al, 2016 <sup>42</sup>         | Brazil               | 54          | 29 (54)    | Oncology                  | 2010           | 76.00%                   | MBI                          |

|                                      |                        |      |             |                           |              |        |     |
|--------------------------------------|------------------------|------|-------------|---------------------------|--------------|--------|-----|
| De Andrade et al, 2016 <sup>43</sup> | Brazil                 | 32   | 7 (22)      | Pediatrics                | 2009         | 18.80% | MBI |
| Dominguez et al, 2018 <sup>44</sup>  | Colombia               | 202  | 129 (69.3)  | NR                        | 2015         | 33.20% | MBI |
| Dyrbye et al, 2014 <sup>45</sup>     | USA                    | 1701 | 827 (48.6)  | Multiple                  | 2012         | 60.30% | MBI |
| Elmore et al, 2016 <sup>46</sup>     | USA                    | 665  | 375 (56.4)  | General Surgery           | 2014         | 69.00% | MBI |
| Embriaco et al, 2007 <sup>47</sup>   | France                 | 372  | NR          | NR                        | 2004         | 42.70% | MBI |
| Fahrenkopf et al, 2008 <sup>48</sup> | USA                    | 123  | 37 (30.0)   | NR                        | 2003         | 75.00% | MBI |
| Galam et al, 2013 <sup>49</sup>      | France                 | 4050 | 1268 (31.3) | General Practice          | 2011         | 24.10% | MBI |
| Garza et al, 2004 <sup>50</sup>      | USA                    | 136  | 39 (29.9)   | Obstetrics and Gynecology | NR           | 18.00% | MBI |
| Goitein et al, 2005 <sup>51</sup>    | USA                    | 118  | 56 (47.5)   | Internal Medicine         | 2004         | 68.00% | MBI |
| Golub et al, 2007 <sup>52</sup>      | USA                    | 514  | 406 (79.0)  | Otolaryngology            | 2005         | 10.00% | MBI |
| Gopal et al, 2005 <sup>53</sup>      | USA                    | 121  | 58 (48.0)   | Internal Medicine         | 2003         | 61.00% | MBI |
| Gopal et al, 2007 <sup>54</sup>      | USA                    | 106  | 45 (42.5)   | Internal medicine         | 2004         | 55.00% | MBI |
| Gouveia et al, 2017 <sup>55</sup>    | Brazil                 | 129  | 62 (48.0)   | Multiple                  | 2015         | 27.90% | MBI |
| Govardhan et al, 2012 <sup>56</sup>  | USA                    | 49   | 4 (9)       | Obstetrics and Gynecology | 2009         | 13.00% | MBI |
| Goveia et al, 2018 <sup>7</sup>      | Brazil                 | 37   | NR          | Anesthesia                | 2014 to 2015 | 2.70%  | MBI |
| Hameed et al, 2018 <sup>57</sup>     | Saudi Arabia           | 181  | 75 (41.4)   | Multiple                  | 2013 to 2014 | 80.70% | MBI |
| Hill et al, 2009 <sup>58</sup>       | USA                    | 22   | NR          | Otolaryngology            | 2006         | 31.82% | MBI |
| Holmes et al, 2017 <sup>59</sup>     | USA                    | 276  | 97 (35.0)   | Multiple                  | 2014         | 69.00% | MBI |
| Jamjoom et al, 2018 <sup>60</sup>    | Saudi Arabia           | 32   | 2 (6)       | Pediatrics                | 2016         | 70.00% | MBI |
| Joaquim et al, 2018 <sup>61</sup>    | Portugal               | 115  | 30 (26.3)   | Oncology                  | 2011         | 45.20% | MBI |
| Krug et al, 2017 <sup>62</sup>       | USA                    | 112  | 47 (42.0)   | Internal Medicine         | 2012         | 61.00% | MBI |
| Kwah et al, 2016 <sup>63</sup>       | USA                    | 32   | NR          | Internal Medicine         | 2012         | 75.00% | MBI |
| Landrigan et al, 2008 <sup>64</sup>  | USA                    | 213  | 62 (29.3)   | Pediatrics                | 2003 & 2004  | 75.40% | MBI |
| Landrigan et al, 2008 <sup>64</sup>  | USA                    | 213  | 78 (31.7)   | Pediatrics                | 2003 & 2004  | 57.00% | MBI |
| Lee et al, 2018 <sup>65</sup>        | Singapore              | 446  | 208 (46.6)  | Multiple                  | 2015         | 80.70% | MBI |
| Leung et al, 2017 <sup>66</sup>      | Australia, New Zealand | 107  | 53 (50.0)   | Oncology                  | 2015         | 49.50% | MBI |

1  
2  
3  
4  
5  
6  
7  
8  
9  
10  
11  
12  
13  
14  
15  
16  
17  
18  
19  
20  
21  
22  
23  
24  
25  
26  
27  
28  
29  
30  
31  
32  
33  
34  
35  
36  
37  
38  
39  
40  
41  
42  
43  
44  
45  
46  
47

|                                            |           |     |            |                    |              |        |     |
|--------------------------------------------|-----------|-----|------------|--------------------|--------------|--------|-----|
| Levin et al, 2017 <sup>67</sup>            | USA       | 354 | 182 (51.4) | Neurology          | 2016         | 67.20% | MBI |
| Lin et al, 2016 <sup>68</sup>              | USA       | 73  | 42 (58)    | General Surgery    | 2013 to 2014 | 82.00% | MBI |
| Lindeman et al, 2013 <sup>69</sup>         | USA       | 30  | 21 (70)    | General Surgery    | 2011         | 93.00% | MBI |
| Lindeman et al, 2013 <sup>69</sup>         | USA       | 36  | 24 (67)    | General Surgery    | 2012         | 75.00% | MBI |
| Lindeman et al, 2017 <sup>70</sup>         | USA       | 88  | 46 (52)    | General Surgery    | 2016         | 51.00% | MBI |
| Llera et al, 2014 <sup>71</sup>            | Argentina | 92  | 28 (30)    | Multiple           | 2011         | 19.60% | MBI |
| Malik et al, 2016 <sup>72</sup>            | Pakistan  | 133 | 98 (73.7)  | Multiple           | NS           | 57.90% | MBI |
| Martini et al, 2004 <sup>73</sup>          | USA       | 110 | NR         | Multiple           | 2003         | 49.00% | MBI |
| Martini et al, 2006 <sup>74</sup>          | USA       | 118 | NR         | Multiple           | 2004         | 41.00% | MBI |
| Mohammed et al, 2014 <sup>75</sup>         | Egypt     | 84  | 46 (55)    | Multiple           | 2012         | 76.00% | MBI |
| Msaouel et al, 2010 <sup>76</sup>          | Greece    | 311 | 172 (55.3) | Multiple           | NR           | 49.50% | MBI |
| Nolan et al, 2017 <sup>77</sup>            | Canada    | 166 | 43 (26.0)  | Pediatrics         | 2014         | 42.00% | MBI |
| O'Connor et al, 2017 <sup>78</sup>         | Ireland   | 172 | 75 (43.6)  | Multiple           | 2015         | 69.50% | MBI |
| Olson et al, 2014 <sup>79</sup>            | USA       | 76  | 40 (53)    | Internal Medicine  | 2012         | 53.90% | MBI |
| Olson et al, 2015 <sup>80</sup>            | USA       | 45  | 16 (36)    | Pediatrics         | 2014         | 40.00% | MBI |
| Pantaleoni et al, 2014 <sup>81</sup>       | USA       | 61  | NR         | Pediatrics         | 2011         | 46.00% | MBI |
| Ramey et al, 2017 <sup>82</sup>            | USA       | 205 | 141 (68.8) | Oncology           | 2016         | 33.20% | MBI |
| Ripp et al, 2010 <sup>83</sup>             | USA       | 145 | 73 (50.3)  | Internal Medicine  | 2007         | 34.00% | MBI |
| Ripp et al, 2011 <sup>84</sup>             | USA       | 191 | 126 (66.0) | Internal Medicine  | 2009         | 81.00% | MBI |
| Ripp et al, 2015 <sup>85</sup>             | USA       | 133 | 77 (58.0)  | Internal Medicine  | 2012         | 75.00% | MBI |
| Rosen et al, 2006 <sup>86</sup>            | USA       | 47  | 23 (49)    | Internal Medicine  | 2003         | 55.30% | MBI |
| Sajjadi et al, 2017 <sup>87</sup>          | Canada    | 43  | 19 (45)    | IM                 | 2014         | 21.00% | MBI |
| Sargent et al, 2009 <sup>88</sup>          | USA       | 384 | 338 (88.0) | Orthopedic Surgery | NR           | 56.00% | MBI |
| Shanafelt et al, 2002 <sup>89</sup>        | USA       | 115 | 54 (47.0)  | Internal Medicine  | 2001         | 76.00% | MBI |
| Siu et al, 2012 <sup>90</sup>              | Hong Kong | 77  | NR         | NR                 | 2009         | 48.00% | MBI |
| Spataro et al, 2016 <sup>91</sup>          | USA       | 198 | 102 (51.0) | Internal Medicine  | 2014         | 22.00% | MBI |
| Sulaiman et al, 2017 <sup>92</sup>         | Ireland   | 265 | 140 (52.8) | Multiple           | NS           | 26.40% | MBI |
| Toral-Villanueva et al, 2009 <sup>93</sup> | Mexico    | 312 | 177 (57.0) | Multiple           | 2003         | 40.00% | MBI |
| Waldman et al, 2009 <sup>94</sup>          | Argentina | 106 | 70 (66.0)  | Cardiology         | 2007         | 80.20% | MBI |

|                                           |                                                                            |      |            |                   |              |        |                                                       |
|-------------------------------------------|----------------------------------------------------------------------------|------|------------|-------------------|--------------|--------|-------------------------------------------------------|
| Willcock et al, 2004 <sup>95</sup>        | Australia                                                                  | 110  | 70 (56.0)  | Psychiatry        | 2001         | 54.00% | MBI                                                   |
| Williford et al, 2018 <sup>96</sup>       | USA                                                                        | 76   | NR         | General Surgery   | 2017         | 75.00% | MBI                                                   |
| Zis et al, 2014 <sup>9</sup>              | Greece                                                                     | 263  | 141 (53.6) | Multiple          | 2012         | 14.40% | MBI                                                   |
| Zis et al, 2015 <sup>97</sup>             | Greece                                                                     | 116  | 52 (44.8)  | Neurology         | 2014         | 18.10% | MBI                                                   |
| Talih et al, 2016 <sup>98</sup>           | Lebanon                                                                    | 118  | 62 (53.0)  | Multiple          | 2013         | 27.00% | Burnout Measure (modified)                            |
| Pereira-Lima et al, 2015 <sup>99</sup>    | Brazil                                                                     | 305  | 159 (52.1) | Multiple          | NR           | 58.36% | Burnout Syndrome Inventory                            |
| See et al, 2016 <sup>100</sup>            | Singapore                                                                  | 64   | NR         | Internal Medicine | 2013         | 71.80% | Copenhagen Burnout Inventory                          |
| Jovanovic et al, 2016 <sup>101</sup>      | Europe                                                                     | 1980 | 804 (40.6) | Psychiatry        | 2008 to 2012 | 36.70% | MBI-GS                                                |
| Miyoshi et al, 2016 <sup>102</sup>        | Japan                                                                      | 85   | 47 (55)    | NR                | 2013         | 30.59% | MBI-GS                                                |
| Torppa et al, 2015 <sup>103</sup>         | Finland                                                                    | 97   | NR         | General Practice  | 2011         | 16.50% | Modified MBI (1 item)                                 |
| De Oliveira Jr et al, 2013 <sup>104</sup> | USA                                                                        | 1417 | 808 (57.0) | Anesthesia        | NR           | 41.00% | Modified MBI (12 questions)                           |
| Ruitenburng et al, 2012 <sup>105</sup>    | Netherlands                                                                | 181  | 76 (42.0)  | Multiple          | 2009         | 7.00%  | Modified MBI (13 items)                               |
| Ringrose et al, 2009 <sup>106</sup>       | Netherlands                                                                | 47   | 23 (49)    | Multiple          | 2007         | 31.00% | Modified MBI (15 items)                               |
| McNeeley et al, 2013 <sup>107</sup>       | USA                                                                        | 249  | 182 (73.0) | Radiology         | 2012         | 62.00% | Modified MBI (2 Single Item Measures, & PA (5 items)) |
| Porrino et al, 2017 <sup>108</sup>        | USA                                                                        | 58   | 48 (83)    | Radiology         | 2016         | 87.90% | Modified MBI (2 Single Item Measures, & PA (5 items)) |
| Baer et al, 2017 <sup>109</sup>           | USA                                                                        | 258  | 54 (21.1)  | Pediatrics        | 2013         | 39.10% | Modified MBI (2-Single Item Measures of EE and DP)    |
| Mordant et al, 2014 <sup>110</sup>        | Italy (n=34), Netherlands (n=22), France (n=22), Belgium (n=22), UK (n=17) | 155  | 103 (66.5) | Multiple          | 2010         | 24.80% | Modified MBI (2-Single Item Measures of EE and DP)    |

1  
2  
3  
4  
5  
6  
7  
8  
9  
10  
11  
12  
13  
14  
15  
16  
17  
18  
19  
20  
21  
22  
23  
24  
25  
26  
27  
28  
29  
30  
31  
32  
33  
34  
35  
36  
37  
38  
39  
40  
41  
42  
43  
44  
45  
46  
47

|                                         |                                                                                                                                                                                            |      |            |                    |      |        |                                                    |
|-----------------------------------------|--------------------------------------------------------------------------------------------------------------------------------------------------------------------------------------------|------|------------|--------------------|------|--------|----------------------------------------------------|
|                                         | (n=14), Austria (n=7), Portugal (n=5), Poland (n=4), Spain (n=4), Slovenia (n=4), Germany (n=3), Lithuania (n=3), Greece (n=2), Ukraine (n=2), Ireland (n=2), Bulgaria (n=2), Other (n=22) |      |            |                    |      |        |                                                    |
| Shanafelt et al, 2014 <sup>111</sup>    | USA                                                                                                                                                                                        | 1345 | 710 (52.8) | Oncology           | 2014 | 34.10% | Modified MBI (2-Single Item Measures of EE and DP) |
| Simpkin et al, 2018 <sup>112</sup>      | US and Canada                                                                                                                                                                              | 49   | 15 (30)    | Pediatrics         | 2015 | 31.00% | Modified MBI (2-Single Item Measures of EE and DP) |
| Trockel et al, 2018 <sup>113</sup>      | USA                                                                                                                                                                                        | 185  | NR         | Multiple           | NS   | 50.00% | Modified MBI (2-Single Item Measures of EE and DP) |
| van Vendelo et al, 2014 <sup>114</sup>  | Netherlands                                                                                                                                                                                | 105  | 83 (79.0)  | Orthopedic Surgery | 2011 | 27.60% | Modified MBI (2-Single Item Measures of EE and DP) |
| Prins et al, 2007 <sup>115</sup>        | The Netherlands                                                                                                                                                                            | 158  | 76 (48.0)  | Multiple           | 2003 | 13.00% | Modified MBI (20 items)                            |
| Prins et al, 2010 <sup>116</sup>        | The Netherlands                                                                                                                                                                            | 2115 | 820 (38.8) | Multiple           | 2005 | 21.00% | Modified MBI (20 items)                            |
| van der Wal et al, 2016 <sup>117</sup>  | Netherlands                                                                                                                                                                                | 141  | 53 (37.6)  | Anesthesia         | 2012 | 11.30% | Modified MBI (20 items)                            |
| van Vendeloo et al, 2018 <sup>118</sup> | Netherlands                                                                                                                                                                                | 1231 | 325 (26.4) | Multiple           | 2015 | 15.00% | Modified MBI (20 items)                            |
| van Vendeloo et al, 2018 <sup>119</sup> | Belgium                                                                                                                                                                                    | 236  | 96 (40.7)  | Multiple           | 2016 | 41.50% | Modified MBI (20 items)                            |

|                                      |                        |     |            |                   |      |        |                                              |
|--------------------------------------|------------------------|-----|------------|-------------------|------|--------|----------------------------------------------|
| Block et al, 2013 <sup>120</sup>     | USA                    | 55  | 29 (53)    | Internal Medicine | 2011 | 76.00% | Modified MBI (6 items)                       |
| Lebares et al, 2018 <sup>121</sup>   | USA                    | 566 | 277 (49.0) | General Surgery   | 2016 | 68.95% | Modified MBI (9 items)                       |
| Shakir et al, 2017 <sup>122</sup>    | USA                    | 255 | 205 (80.4) | Neurosurgery      | 2016 | 36.50% | Modified MBI (9 items)                       |
| Huggard et al, 2011 <sup>123</sup>   | New Zealand            | 253 | 104 (41.1) | Multiple          | NR   | 19.50% | Professional Quality of Life Index Version 3 |
| Low et al, 2018 <sup>124</sup>       | Singapore              | 43  | 18 (43)    | Multiple          | 2015 | 34.88% | Professional Quality of Life Scale           |
| Markwell et al, 2009 <sup>125</sup>  | Australia, New Zealand | 914 | 402 (44.0) | Multiple          | 2008 | 69.00% | Professional Quality of Life Scale           |
| Cooke et al, 2013 <sup>126</sup>     | Australia              | 128 | NR         | General Practice  | 2010 | 14.00% | Single item measure                          |
| Kealy et al, 2016 <sup>127</sup>     | Canada                 | 400 | 123 (30.8) | Psychiatry        | 2014 | 21.00% | Single item measure                          |
| Lambden et al, 2018 <sup>128</sup>   | USA                    | 72  | NR         | Multiple          | 2017 | 53.50% | Single item measure                          |
| Leach et al, 2018 <sup>129</sup>     | USA                    | 43  | 27 (63)    | General Surgery   | 2017 | 30.20% | Single item measure                          |
| Raviola et al, 2002 <sup>130</sup>   | Kenya                  | 50  | NR         | Multiple          | NS   | 82.00% | Single item measure                          |
| Robertson et al, 2017 <sup>131</sup> | USA                    | 340 | 143 (42.0) | Multiple          | 2015 | 34.00% | Single item measure                          |
| Schweitzer, 1994 <sup>132</sup>      | South Africa           | 36  | NR         | NR                | NR   | 55.50% | Single item measure                          |

**Table 2** Meta regression of burnout prevalence with region

| Region                     | n residents | N studies | Estimate of $\beta$ coefficient (95% CI)** |
|----------------------------|-------------|-----------|--------------------------------------------|
| Europe                     | 12,782      | 24        | Reference                                  |
| Africa                     | 86          | 2         | 0.20 (0.10-0.30)                           |
| Asia                       | 914         | 8         |                                            |
| Australia & New Zealand    | 1,563       | 6         |                                            |
| Middle East & North Africa | 1,250       | 10        |                                            |
| South America              | 957         | 8         |                                            |
| North America              | 14,004      | 60        | 0.18 (0.09-0.28)                           |

\* Meta-analysed estimates for each region

\*\*  $\beta$  coefficients are calculated using meta-regression with Europe as the reference group

**Figure 1** Forest plot of studies included in the meta-analysis (attached separately)

**Figure 2** The association between commonly studied factors and burnout in residents

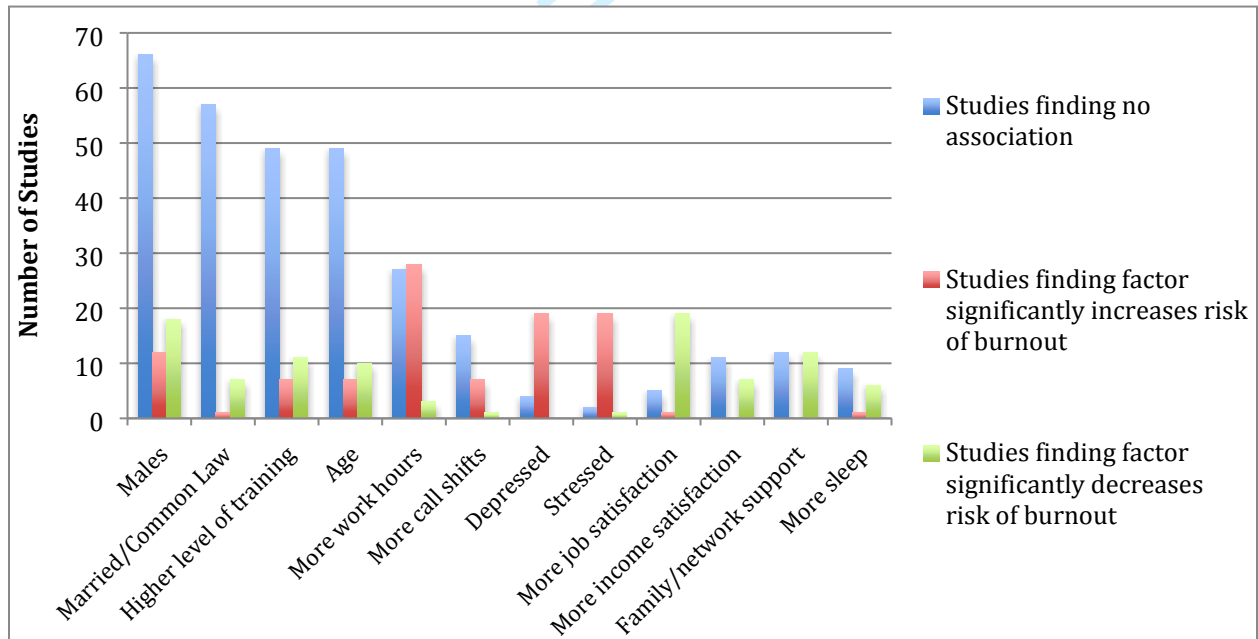

**Figure 3** Prevalence of burnout by year



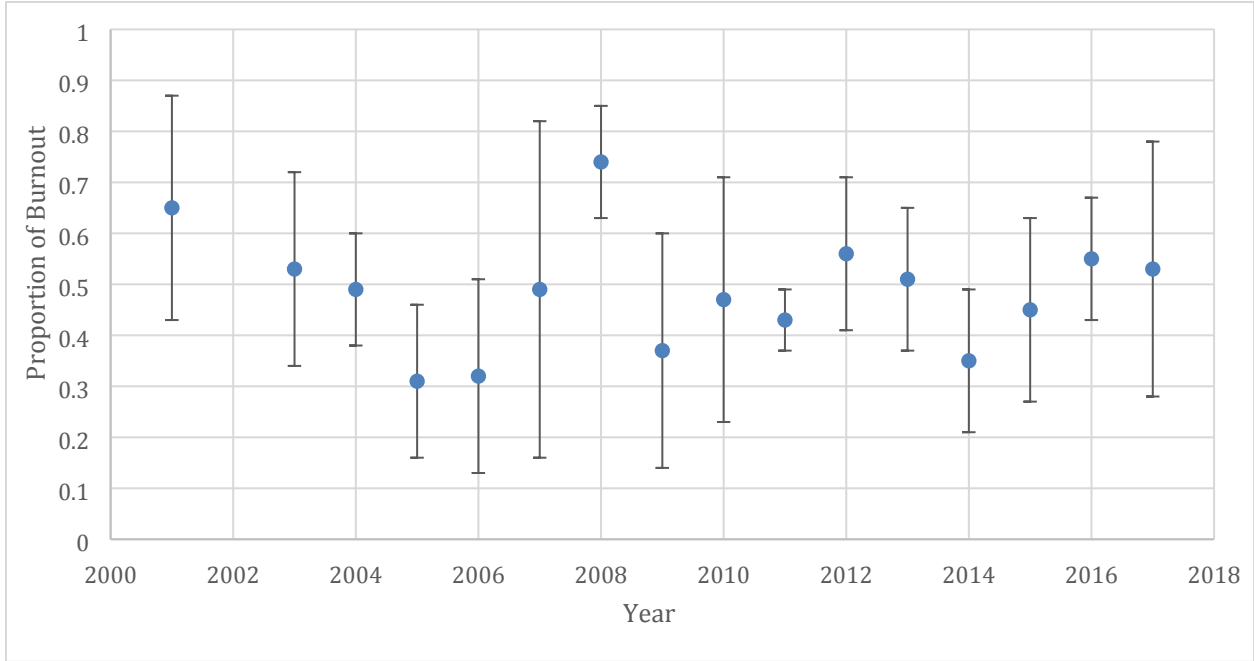

**Figure 4** Geographic distribution of burnout rates among resident physicians

Confidential

1  
2  
3  
4  
5  
6  
7  
8  
9  
10  
11  
12  
13  
14  
15  
16  
17  
18  
19  
20  
21  
22  
23  
24  
25  
26  
27  
28  
29  
30  
31  
32  
33  
34  
35  
36  
37  
38  
39  
40  
41  
42  
43  
44  
45  
46  
47  
48  
49  
50  
51  
52  
53  
54  
55  
56  
57  
58  
59  
60

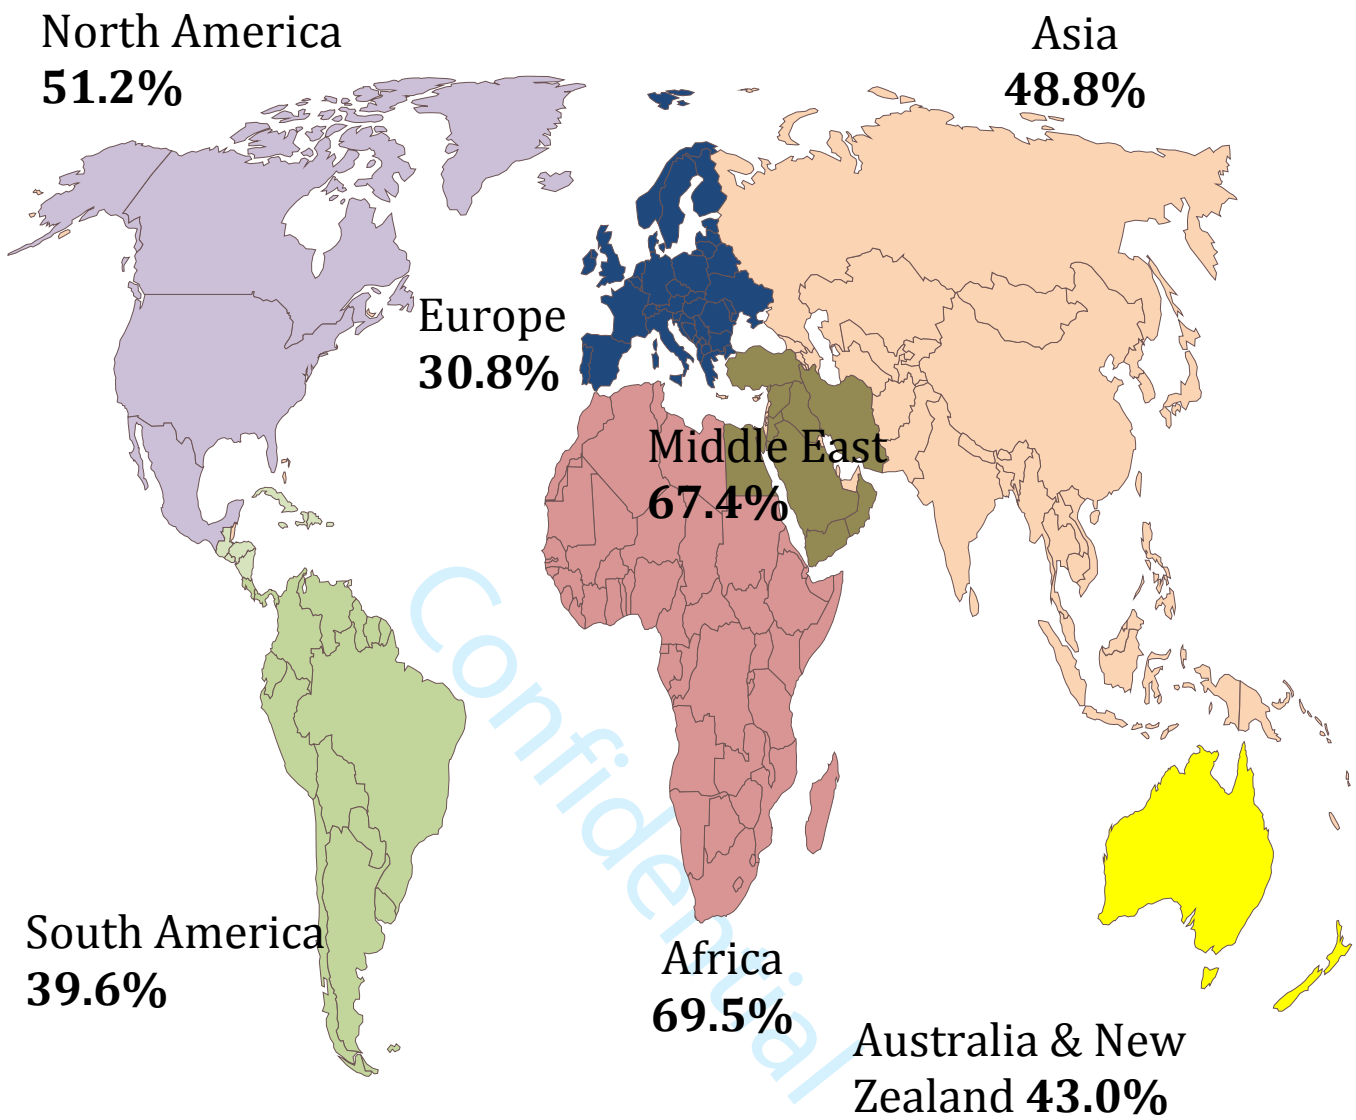

1  
2  
3  
4  
5  
6  
7  
8  
9  
10  
11  
12  
13  
14  
15  
16  
17  
18  
19  
20  
21  
22  
23  
24  
25  
26  
27  
28  
29  
30  
31  
32  
33  
34  
35  
36  
37  
38  
39  
40  
41  
42  
43  
44  
45  
46  
47  
48  
49  
50  
51  
52  
53  
54  
55  
56  
57  
58  
59  
60

Confidential

## REFERENCES

1. Shanafelt TD, Hasan O, Dyrbye LN, et al. Changes in Burnout and Satisfaction With Work-Life Balance in Physicians and the General US Working Population Between 2011 and 2014. *Mayo Clin Proc.* 2015;90(12):1600-1613. doi:10.1016/j.mayocp.2015.08.023
2. Rotenstein LS, Torre M, Ramos MA, et al. Prevalence of Burnout Among Physicians. *JAMA.* 2018;320(11):1131. doi:10.1001/jama.2018.12777
3. Yaghmour NA, Brigham TP, Richter T, et al. Causes of death of residents in ACGME-Accredited programs 2000 through 2014: Implications for the learning environment. *Acad Med.* 2017;92(7):976-983. doi:10.1097/ACM.0000000000001736
4. Panagioti M, Panagopoulou E, Bower P, et al. Controlled Interventions to Reduce Burnout in Physicians. *JAMA Intern Med.* 2017;177(2):195. doi:10.1001/jamainternmed.2016.7674
5. Kuremyr D, Kihlgren M, Norberg A, Aström S, Karlsson I. Emotional experiences, empathy and burnout among staff caring for demented patients at a collective living unit and a nursing home. *J Adv Nurs.* 1994;19(4):670-679.  
<http://www.ncbi.nlm.nih.gov/pubmed/8021387>. Accessed June 25, 2019.
6. Geelan-Hansen K, Anne S, Benninger MS. Burnout in Otolaryngology-Head and Neck Surgery: A Single Academic Center Experience. *Otolaryngol - Head Neck Surg (United States).* 2018;(PG-). doi:<http://dx.doi.org/10.1177/0194599818774740>
7. Goveia CS, Cruz TTMD, de Miranda DB, et al. Association between burnout syndrome and anxiety in residents and anesthesiologists of the Federal District. *Brazilian J Anesthesiol.* 2018;(PG-). doi:<http://dx.doi.org/10.1016/j.bjan.2018.02.007>
8. *CMA NATIONAL PHYSICIAN HEALTH SURVEY A National Snapshot.*; 2018.
9. Zis P, Anagnostopoulos F, Sykioti P. Burnout in medical residents: A study based on the job demands-resources model. *Sci World J.* 2014;2014(PG-673279):673279.  
doi:<http://dx.doi.org/10.1155/2014/673279>
10. Agha A, Mordya A, Anwar E, Saleh N, Rashid I, Saeed M. Burnout among middle-grade doctors of tertiary care hospital in Saudi Arabia. *Work J Prev Assess Rehabil.* 2015;51(4 PG-839-847):839-847. doi:10.3233/wor-141898
11. Covidence systematic review software, Veritas Health Innovation, Melbourne, Australia. Available at [www.covidence.org](http://www.covidence.org).
12. Lipsey MW, Wilson DB. Practical meta-analysis. *Appl Soc Res methods Ser.* 2001;49.
13. DeCaporale-Ryan L, Sakran J V, Grant SB, et al. The undiagnosed pandemic: Burnout and depression within the surgical community. *Curr Probl Surg.* 2017;54(9):453-502.  
doi:10.1067/j.cpsurg.2017.07.001
14. Taris TW, Le Blanc PM, Schaufeli WB, Schreurs PJG. Are there causal relationships between the dimensions of the Maslach Burnout Inventory? A review and two longitudinal tests. *Work Stress.* 2005;19(3):238-255. doi:10.1080/02678370500270453
15. Blanchard P, Truchot D, Albiges-Sauvin L, et al. Prevalence and causes of burnout amongst oncology residents: a comprehensive nationwide cross-sectional study. *Eur J Cancer.* 2010;46(15 PG-2708-15):2708-2715.  
doi:<https://dx.doi.org/10.1016/j.ejca.2010.05.014>
16. Stroup DF, Berlin JA, Morton SC, et al. Meta-analysis of observational studies in epidemiology: a proposal for reporting. Meta-analysis Of Observational Studies in Epidemiology (MOOSE) group. *JAMA.* 2000;283(15):2008-2012.  
<http://www.ncbi.nlm.nih.gov/pubmed/10789670>. Accessed June 26, 2019.

17. Moher D, Liberati A, Tetzlaff J, Altman DG, PRISMA Group. Preferred Reporting Items for Systematic Reviews and Meta-Analyses: The PRISMA Statement. *PLoS Med*. 2009;6(7):e1000097. doi:10.1371/journal.pmed.1000097
18. Maslach C, Jackson S, Leiter M. *Maslach Burnout Inventory Manual*. 3rd ed. Palo Alto, CA: Consulting Psychologists Press; 1996.
19. West CP, Dyrbye LN, Sloan JA, Shanafelt TD. Single item measures of emotional exhaustion and depersonalization are useful for assessing burnout in medical professionals. *J Gen Intern Med*. 2009;24(12 PG-1318-1321):1318-1321. doi:http://dx.doi.org/10.1007/s11606-009-1129-z
20. Temple J. Resident duty hours around the globe: where are we now? *BMC Med Educ*. 2014;14(S1):S8. doi:10.1186/1472-6920-14-S1-S8
21. Busireddy KR, Miller JA, Ellison K, Ren V, Qayyum R, Panda M. Efficacy of Interventions to Reduce Resident Physician Burnout: A Systematic Review. *J Grad Med Educ*. 2017;9(3):294-301. doi:10.4300/JGME-D-16-00372.1
22. Alesina A, Glaeser E, Sacerdote B. *Work and Leisure in the U.S. and Europe: Why So Different?* Cambridge, MA; 2005. doi:10.3386/w11278
23. Abdulrahman M, Farooq MM, Al Kharmiri A, Al Marzooqi F, Carrick FR. Burnout and depression among medical residents in the United Arab Emirates: A Multicenter study. *J Fam Med Prim care*. 2018;7(2 PG-435-441):435-441. doi:https://dx.doi.org/10.4103/jfmpe.jfmpe\_199\_17
24. Aksoy DY, Durusu Tanriover M, Dizdar O, et al. Burnout syndrome during residency in internal medicine and pediatrics in a country without working time directive. *Int J Health Care Qual Assur*. 2014;27(3 PG-223-230):223-230. doi:http://dx.doi.org/10.1108/IJHCQA-12-2012-0127
25. Al-Ma'mari NO, Naimi AI, Tulandi T. Prevalence and predictors of burnout among obstetrics and gynecology residents in Canada. *Gynecol Surg*. 2016;13(4 PG-323-327):323-327. doi:http://dx.doi.org/10.1007/s10397-016-0955-3
26. Aldrees TM, Aleissa S, Zamakhshary M, Badri M, Sadat-Ali M. Physician well-being: Prevalence of burnout and associated risk factors in a tertiary hospital, Riyadh, Saudi Arabia. *Ann Saudi Med*. 2013;33(5 PG-451-456):451-456. doi:http://dx.doi.org/10.5144/0256-4947.2013.451
27. Aldrees T, Badri M, Islam T, Alqahtani K. Burnout among otolaryngology residents in Saudi Arabia: A multicenter study. *J Surg Educ*. 2015;72(5 PG-844-848):844-848. doi:http://dx.doi.org/10.1016/j.jsurg.2015.02.006
28. Aldrees T, Hassouneh B, Alabdulkarim A, et al. Burnout among plastic surgery residents: National survey in Saudi Arabia. *Saudi Med J*. 2017;38(8 PG-832-836):832-836. doi:http://dx.doi.org/10.15537/smj.2017.8.18346
29. Arora M, Diwan AD, Harris IA. Prevalence and factors of burnout among Australian orthopaedic trainees: a cross-sectional study. *J Orthop Surg (Hong Kong)*. 2014;22(3 PG-374-7):374-377. http://ovidsp.ovid.com/ovidweb.cgi?T=JS&PAGE=reference&D=med8&NEWS=N&AN=25550022 NS -.
30. Ashkar K, Romani M, Musharrafieh U, Chaaya M. Prevalence of burnout syndrome among medical residents: experience of a developing country. *Postgrad Med J*. 2010;86(1015 PG-266-71):266-271. doi:https://dx.doi.org/10.1136/pgmj.2009.092106
31. Attenello FJ, Buchanan IA, Wen T, et al. Factors associated with burnout among US

- 1  
2  
3 neurosurgery residents: a nationwide survey. *J Neurosurg*. 2018;(PG-1-15):1-15.  
4 doi:<https://dx.doi.org/10.3171/2017.9.JNS17996>
- 5 32. Becker JL, Milad MP, Klock SC. Burnout, depression, and career satisfaction: Cross-  
6 sectional study of obstetrics and gynecology residents. *Am J Obstet Gynecol*. 2006;195(5  
7 PG-1444-1449):1444-1449. doi:<http://dx.doi.org/10.1016/j.ajog.2006.06.075>
- 8 33. Billings ME, Lazarus ME, Wenrich M, Curtis JR, Engelberg RA. The effect of the hidden  
9 curriculum on resident burnout and cynicism. *J Grad Med Educ*. 2011;3(4 PG-503-  
10 10):503-510. doi:<https://dx.doi.org/10.4300/JGME-D-11-00044.1>
- 11 34. Bogg J, Gibbs T, Bundred P. Training, job demands and mental health of pre-registration  
12 house officers. *Med Educ*. 2001;35(6 PG-590-5):590-595.  
13 <http://ovidsp.ovid.com/ovidweb.cgi?T=JS&PAGE=reference&D=med4&NEWS=N&AN=11380863> NS -.
- 14 35. Braun SE, Auerbach SM, Rybarczyk B, Lee B, Call S. Mindfulness, burnout, and effects  
15 on performance evaluations in internal medicine residents. *Adv Med Educ Pract*.  
16 2017;8(PG-591-597):591-597. doi:<https://dx.doi.org/10.2147/AMEP.S140554>
- 17 36. Campbell J, Prochazka A V, Yamashita T, Gopal R. Predictors of persistent burnout in  
18 internal medicine residents: a prospective cohort study. *Acad Med*. 2010;85(10 PG-1630-  
19 4):1630-1634. doi:<https://dx.doi.org/10.1097/ACM.0b013e3181f0c4e7>
- 20 37. Castelo-Branco C, Figueras F, Eixarch E, et al. Stress symptoms and burnout in obstetric  
21 and gynaecology residents. *BJOG An Int J Obstet Gynaecol*. 2007;114(1 PG-94-98):94-  
22 98. doi:<http://dx.doi.org/10.1111/j.1471-0528.2006.01155.x>
- 23 38. Chaput B, Bertheuil N, Jacques J, et al. Professional Burnout Among Plastic Surgery  
24 Residents: Can it be Prevented? Outcomes of a National Survey. *Ann Plast Surg*.  
25 2015;75(1 PG-2-8):2-8. doi:<https://dx.doi.org/10.1097/SAP.0000000000000530>
- 26 39. Chati R, Huet E, Grimberg L, Schwarz L, Tuech J-J, Bridoux V. Factors associated With  
27 burnout among French digestive surgeons in training: results of a national survey on 328  
28 residents and fellows. *Am J Surg*. 2017;213(4 PG-754-762):754-762.  
29 doi:<https://dx.doi.org/10.1016/j.amjsurg.2016.08.003>
- 30 40. Chaukos D, Chad-Friedman E, Mehta DH, et al. Risk and Resilience Factors Associated  
31 with Resident Burnout. *Acad Psychiatry*. 2017;41(2 PG-189-194):189-194.  
32 doi:<http://dx.doi.org/10.1007/s40596-016-0628-6>
- 33 41. Cofer KD, Hollis RH, Goss L, Morris MS, Porterfield JR, Chu DI. Burnout is Associated  
34 With Emotional Intelligence but not Traditional Job Performance Measurements in  
35 Surgical Residents. *J Surg Educ*. 2018;(PG-).  
36 doi:<http://dx.doi.org/10.1016/j.jsurg.2018.01.021>
- 37 42. Cubero DIG, Fumis RRL, de Sa TH, et al. "Burnout in Medical Oncology Fellows: a  
38 Prospective Multicenter Cohort Study in Brazilian Institutions." *J Cancer Educ*.  
39 2016;31(3 PG-582-7):582-587. doi:<https://dx.doi.org/10.1007/s13187-015-0850-z>
- 40 43. De Andrade APM, Amaro E, Farhat SCL, Schwartsman C. Higher burnout scores in  
41 paediatric residents are associated with increased brain activity during attentional  
42 functional magnetic resonance imaging task. *Acta Paediatr Int J Paediatr*. 2016;105(6  
43 PG-705-713):705-713. doi:<http://dx.doi.org/10.1111/apa.13371>
- 44 44. Dominguez LC, Stassen L, de Grave W, Sanabria A, Alfonso E, Dolmans D. Taking  
45 control: Is job crafting related to the intention to leave surgical training? *PLoS One*.  
46 2018;13(6 PG-e0197276):e0197276. doi:<https://dx.doi.org/10.1371/journal.pone.0197276>
- 47 45. Dyrbye LN, West CP, Satele D, et al. Burnout among u.s. medical students, residents, and  
48  
49  
50  
51  
52  
53  
54  
55  
56  
57  
58  
59  
60

- early career physicians relative to the general u.s. population. *Acad Med.* 2014;89(3 PG-443-451):443-451. doi:http://dx.doi.org/10.1097/ACM.0000000000000134
46. Elmore LC, Jeffe DB, Jin L, Awad MM, Turnbull IR. National Survey of Burnout among US General Surgery Residents. *J Am Coll Surg.* 2016;223(3 PG-440-451):440-451. doi:http://dx.doi.org/10.1016/j.jamcollsurg.2016.05.014
47. Embriaco N, Azoulay E, Barrau K, et al. High level of burnout in intensivists: Prevalence and associated factors. *Am J Respir Crit Care Med.* 2007;175(7 PG-686-692):686-692. doi:http://dx.doi.org/10.1164/rccm.200608-1184OC
48. Fahrenkopf AM, Sectish TC, Barger LK, et al. Rates of medication errors among depressed and burnt out residents: Prospective cohort study. *BMJ.* 2008;336(7642 PG-488-491):488-491. doi:http://dx.doi.org/10.1136/bmj.39469.763218.BE
49. Galam E, Komly V, Le Tourneur A, Jund J. Burnout among French GPs in training: A cross-sectional study. *Br J Gen Pract.* 2013;63(608 PG-217-224):e217-e224. doi:http://dx.doi.org/10.3399/bjgp13X664270
50. Garza JA, Schneider KM, Promecene P, Monga M. Burnout in residency: Statewide study. *South Med J.* 2004;97(12 PG-1171-1173):1171-1173. doi:http://dx.doi.org/10.1097/01.SMJ.0000129926.66568.10
51. Goitein L, Shanafelt TD, Wipf JE, Slatore CG, Back AL. The effects of work-hour limitations on resident well-being, patient care, and education in an internal medicine residency program. *Arch Intern Med.* 2005;165(22 PG-2601-2606):2601-2606. doi:http://dx.doi.org/10.1001/archinte.165.22.2601
52. Golub JS, Weiss PS, Ramesh AK, Ossoff RH, Johns 3rd MM. Burnout in residents of otolaryngology-head and neck surgery: a national inquiry into the health of residency training. *Acad Med.* 2007;82(6 PG-596-601):596-601. http://ovidsp.ovid.com/ovidweb.cgi?T=JS&PAGE=reference&D=med5&NEWS=N&AN=17525550 NS -.
53. Gopal R, Glasheen JJ, Miyoshi TJ, Prochazka A V. Burnout and internal medicine resident work-hour restrictions. *Arch Intern Med.* 2005;165(22 PG-2595-2600):2595-2600. doi:http://dx.doi.org/10.1001/archinte.165.22.2595
54. Gopal RK, Carreira F, Baker WA, et al. Internal Medicine Residents Reject “Longer and Gentler” Training. *J Gen Intern Med.* 2007;22(1):102-106. doi:10.1007/s11606-007-0119-2
55. Gouveia PA da C, Ribeiro MHCN, Aschoff CA de M, Gomes DP, Silva NAF da, Cavalcanti HAF. Factors associated with burnout syndrome in medical residents of a university hospital. *Rev Assoc Med Bras.* 2017;63(6 PG-504-511):504-511. doi:https://dx.doi.org/10.1590/1806-9282.63.06.504
56. Govardhan LM, Pinelli V, Schnatz PF. Burnout, depression and job satisfaction in obstetrics and gynecology residents. *Conn Med.* 2012;76(7 PG-389-95):389-395. http://ovidsp.ovid.com/ovidweb.cgi?T=JS&PAGE=reference&D=med7&NEWS=N&AN=23248861 NS -.
57. Hameed TK, Masuadi E, Al Asmary NA, Al-Anzi FG, Al Dubayee MS. A study of resident duty hours and burnout in a sample of Saudi residents. *BMC Med Educ.* 2018;18(1 PG-180):180. doi:https://dx.doi.org/10.1186/s12909-018-1300-5
58. Hill JD, Smith RJH. Monitoring stress levels in postgraduate medical training. *Laryngoscope.* 2009;119(1 PG-75-8):75-78. doi:https://dx.doi.org/10.1002/lary.20013
59. Holmes EG, Connolly A, Putnam KT, et al. Taking Care of Our Own: A Multispecialty

- 1  
2  
3 Study of Resident and Program Director Perspectives on Contributors to Burnout and  
4 Potential Interventions. *Acad Psychiatry*. 2017;41(2 PG-159-166):159-166.  
5 doi:http://dx.doi.org/10.1007/s40596-016-0590-3  
6  
7 60. Jamjoom RS, Park YS. Assessment of pediatric residents burnout in a tertiary academic  
8 centre. *Saudi Med J*. 2018;39(3 PG-296-300):296-300.  
9 doi:http://dx.doi.org/10.15537/smj.2018.3.22328  
10  
11 61. Joaquim A, Custodio S, Savva-Bordalo J, et al. Burnout and occupational stress in the  
12 medical residents of Oncology, Haematology and Radiotherapy: a prevalence and  
13 predictors study in Portugal. *Psychol Health Med*. 2018;23(3 PG-317-324):317-324.  
14 doi:https://dx.doi.org/10.1080/13548506.2017.1344256  
15  
16 62. Krug MF, Golob AL, Wander PL, Wipf JE. Changes in Resident Well-Being at One  
17 Institution Across a Decade of Progressive Work Hours Limitations. *Acad Med*.  
18 2017;92(10 PG-1480-1484):1480-1484.  
19 doi:http://dx.doi.org/10.1097/ACM.0000000000001675  
20  
21 63. Kwah J, Weintraub J, Fallar R, Ripp J. The Effect of Burnout on Medical Errors and  
22 Professionalism in First-Year Internal Medicine Residents. *J Grad Med Educ*. 2016;8(4  
23 PG-597-600):597-600.  
24 http://ovidsp.ovid.com/ovidweb.cgi?T=JS&PAGE=reference&D=emexa&NEWS=N&AN  
25 =615609921 NS - .  
26  
27 64. Landrigan CP, Fahrenkopf AM, Lewin D, et al. Effects of the Accreditation Council for  
28 Graduate Medical Education Duty Hour Limits on Sleep, Work Hours, and Safety.  
29 *Pediatrics*. 2008;122(2):250-258. doi:10.1542/peds.2007-2306  
30  
31 65. Lee PT, Loh J, Sng G, Tung J, Yeo KK. Empathy and burnout: A study on residents from  
32 a Singapore institution. *Singapore Med J*. 2018;59(1 PG-50-54):50-54.  
33 doi:http://dx.doi.org/10.11622/smedj.2017096  
34  
35 66. Leung J, Rioseco P. Burnout, stress and satisfaction among Australian and New Zealand  
36 radiation oncology trainees. *J Med Imaging Radiat Oncol*. 2017;61(1 PG-146-155):146-  
37 155. doi:10.1111/1754-9485.12541  
38  
39 67. Levin KH, Shanafelt TD, Keran CM, et al. Burnout, career satisfaction, and well-being  
40 among US neurology residents and fellows in 2016. *Neurology*. 2017;89(5 PG-492-  
41 501):492-501. doi:http://dx.doi.org/10.1212/WNL.0000000000004135  
42  
43 68. Lin DT, Liebert CA, Tran J, Lau JN, Salles A. Emotional Intelligence as a Predictor of  
44 Resident Well-Being. *J Am Coll Surg*. 2016;223(2 PG-352-358):352-358.  
45 doi:http://dx.doi.org/10.1016/j.jamcollsurg.2016.04.044  
46  
47 69. Lindeman BM, Sacks BC, Hirose K, Lipsett PA. Multifaceted longitudinal study of  
48 surgical resident education, quality of life, and patient care before and after July 2011. *J*  
49 *Surg Educ*. 2013;70(6 PG-769-776):769-776.  
50 doi:http://dx.doi.org/10.1016/j.jsurg.2013.06.018  
51  
52 70. Lindeman B, Petrusa E, McKinley S, et al. Association of Burnout With Emotional  
53 Intelligence and Personality in Surgical Residents: Can We Predict Who Is Most at Risk?  
54 *J Surg Educ*. 2017;74(6 PG-22-30):e22-e30.  
55 doi:http://dx.doi.org/10.1016/j.jsurg.2017.11.001  
56  
57 71. Llera J, Durante E. Correlation between the educational environment and burn-out  
58 syndrome in residency programs at a university hospital. *Arch Argent Pediatr*. 2014;112(1  
59 PG-6-11):6-11. doi:http://dx.doi.org/10.1590/S0325-00752014000100003  
60  
61 72. Malik AA, Bhatti S, Shafiq A, et al. Burnout among surgical residents in a lower-middle



- 1  
2  
3 income country - Are we any different? *Ann Med Surg.* 2016;9(PG-28-32):28-32.  
4 doi:http://dx.doi.org/10.1016/j.amsu.2016.05.012
- 5 73. Martini S, Arfken CL, Churchill A, Balon R. Burnout comparison among residents in  
6 different medical specialties. *Acad Psychiatry.* 2004;28(3 PG-240-242):240-242.  
7 doi:http://dx.doi.org/10.1176/appi.ap.28.3.240
- 8 74. Martini S, Arfken CL, Balon R. Comparison of Burnout Among Medical Residents  
9 Before and After the Implementation of Work Hours Limits. *Acad Psychiatry.*  
10 2006;30(4):352-355. doi:10.1176/appi.ap.30.4.352
- 11 75. Mohammed KA-M, Ali EG, Youssef IM, Fahmy MT, Haggag WE. Depression and  
12 burnout among residents. *Arab J Psychiatry.* 2014;25(1 PG-40-51):40-51.  
13 doi:http://dx.doi.org/10.12816/0004114
- 14 76. Msaouel P, Keramaris NC, Tasoulis A, et al. Burnout and training satisfaction of medical  
15 residents in Greece: will the European Work Time Directive make a difference? *Hum*  
16 *Resour Health.* 2010;8(PG-16):16. doi:https://dx.doi.org/10.1186/1478-4491-8-16
- 17 77. Nolan KJ, Writer H, Ladhani M. Wellness in Canadian paediatric residents and their  
18 program directors. *Paediatr Child Heal.* 2017;22(4 PG-199-202):199-202.  
19 doi:http://dx.doi.org/10.1093/pch/pxx050
- 20 78. O'Connor P, Lydon S, O'Dea A, et al. A longitudinal and multicentre study of burnout  
21 and error in Irish junior doctors. *Postgrad Med J.* 2017;93(1105 PG-660-664):660-664.  
22 doi:http://dx.doi.org/10.1136/postgradmedj-2016-134626
- 23 79. Olson SM, Odo NU, Duran AM, Pereira AG, Mandel JH. Burnout and Physical Activity  
24 in Minnesota Internal Medicine Resident Physicians. *J Grad Med Educ.* 2014;6(4 PG-  
25 669-74):669-674. doi:https://dx.doi.org/10.4300/JGME-D-13-00396
- 26 80. Olson K, Kemper KJ, Mahan JD. What factors promote resilience and protect against  
27 burnout in first-year pediatric and medicine-pediatric residents? *J Evid Based*  
28 *Complementary Altern Med.* 2015;20(3 PG-192-198):192-198.  
29 doi:http://dx.doi.org/10.1177/2156587214568894
- 30 81. Pantaleoni JL, Augustine EM, Sourkes BM, Bachrach LK. Burnout in pediatric residents  
31 over a 2-year period: A longitudinal study. *Acad Pediatr.* 2014;14(2 PG-167-172):167-  
32 172. doi:http://dx.doi.org/10.1016/j.acap.2013.12.001
- 33 82. Ramey SJ, Ahmed AA, Takita C, Wilson LD, Thomas CR, Yechieli R. Burnout  
34 Evaluation of Radiation Residents Nationwide: Results of a Survey of United States  
35 Residents. *Int J Radiat Oncol Biol Phys.* 2017;99(3 PG-530-538):530-538.  
36 doi:http://dx.doi.org/10.1016/j.ijrobp.2017.06.014
- 37 83. Ripp J, Fallar R, Babyatsky M, David R, Reich L, Korenstein D. Prevalence of resident  
38 burnout at the start of training. *Teach Learn Med.* 2010;22(3 PG-172-5):172-175.  
39 doi:https://dx.doi.org/10.1080/10401334.2010.488194
- 40 84. Ripp J, Babyatsky M, Fallar R, et al. The incidence and predictors of job burnout in first-  
41 year internal medicine residents: a five-institution study. *Acad Med.* 2011;86(10 PG-1304-  
42 10):1304-1310. doi:https://dx.doi.org/10.1097/ACM.0b013e31822c1236
- 43 85. Ripp JA, Bellini L, Fallar R, Bazari H, Katz JT, Korenstein D. The impact of duty hours  
44 restrictions on job burnout in internal medicine residents: a three-institution comparison  
45 study. *Acad Med.* 2015;90(4 PG-494-499):494-499.  
46 doi:http://dx.doi.org/10.1097/ACM.0000000000000641
- 47 86. Rosen IM, Gimotty PA, Shea JA, Bellini LM. Evolution of sleep quantity, sleep  
48 deprivation, mood disturbances, empathy, and burnout among interns. *Acad Med.*  
49  
50  
51  
52  
53  
54  
55  
56  
57  
58  
59  
60

- 1  
2  
3  
4  
5  
6  
7  
8  
9  
10  
11  
12  
13  
14  
15  
16  
17  
18  
19  
20  
21  
22  
23  
24  
25  
26  
27  
28  
29  
30  
31  
32  
33  
34  
35  
36  
37  
38  
39  
40  
41  
42  
43  
44  
45  
46  
47  
48  
49  
50  
51  
52  
53  
54  
55  
56  
57  
58  
59  
60
- 2006;81(1 PG-82-85):82-85. doi:<http://dx.doi.org/10.1097/00001888-200601000-00020>
87. Sajjadi S, Norena M, Wong H, Dodek P. Moral distress and burnout in internal medicine residents. *Can Med Educ J*. 2017;8(1 PG-36-43):e36-e43. <http://ovidsp.ovid.com/ovidweb.cgi?T=JS&PAGE=reference&D=prem&NEWS=N&AN=28344714> NS -.
88. Sargent MC, Sotile W, Sotile MO, Rubash H, Barrack RL. Quality of life during orthopaedic training and academic practice. Part 1: Orthopaedic surgery residents and faculty. *J Bone Jt Surg - Ser A*. 2009;91(10 PG-2395-2405):2395-2405. doi:<http://dx.doi.org/10.2106/JBJS.H.00665>
89. Shanafelt TD, Bradley KA, Wipf JE, Back AL. Burnout and self-reported patient care in an internal medicine residency program. *Ann Intern Med*. 2002;136(5 PG-358-367):358-367. <http://ovidsp.ovid.com/ovidweb.cgi?T=JS&PAGE=reference&D=emed8&NEWS=N&AN=34183994> NS -.
90. Siu CFY, Yuen SK, Cheung A. Burnout among public doctors in Hong Kong: cross-sectional survey. *Hong Kong Med J*. 2012;18(3 PG-186-192):186-192.
91. Spataro BM, Tilstra SA, Rubio DM, McNeil MA. The Toxicity of Self-Blame: Sex Differences in Burnout and Coping in Internal Medicine Trainees. *J Women's Heal*. 2016;25(11 PG-1147-1152):1147-1152. doi:<http://dx.doi.org/10.1089/jwh.2015.5604>
92. Sulaiman CFC, Henn P, Smith S, O'Tuathaigh CMP. Burnout syndrome among non-consultant hospital doctors in Ireland: relationship with self-reported patient care. *Int J Qual Heal care J Int Soc Qual Heal Care*. 2017;29(5 PG-679-684):679-684. doi:<https://dx.doi.org/10.1093/intqhc/mzx087>
93. Toral-Villanueva R, Aguilar-Madrid G, Juarez-Perez CA. Burnout and patient care in junior doctors in Mexico City. *Occup Med (Lond)*. 2009;59(1 PG-8-13):8-13. doi:<https://dx.doi.org/10.1093/occmed/kqn122>
94. Waldman S V, Lopez Diez JC, Arazi HC, Linetzky B, Guinjoan S, Grancelli H. Burnout, perceived stress, and depression among cardiology residents in Argentina. *Acad Psychiatry*. 2009;33(4 PG-296-301):296-301. doi:<http://dx.doi.org/10.1176/appi.ap.33.4.296>
95. Willcock SM, Daly MG, Tennant CC, Allard BJ. Burnout and psychiatric morbidity in new medical graduates. *Med J Aust*. 2004;181(7 PG-357-360):357-360. <http://ovidsp.ovid.com/ovidweb.cgi?T=JS&PAGE=reference&D=emed9&NEWS=N&AN=39341646> NS -.
96. Williford ML, Scarlet S, Meyers MO, et al. Multiple-Institution Comparison of Resident and Faculty Perceptions of Burnout and Depression During Surgical Training. *JAMA Surg*. 2018;(PG-). doi:<https://dx.doi.org/10.1001/jamasurg.2018.0974>
97. Zis P, Artemiadis AK, Lykouri M, et al. Residency Training: Determinants of burnout of neurology trainees in Attica, Greece. *Neurology*. 2015;85(11 PG-81-84):e81-e84. doi:<http://dx.doi.org/10.1212/WNL.0000000000001924>
98. Talih F, Warakian R, Ajaltouni J, Shehab AA, Tamim H. Correlates of Depression and Burnout Among Residents in a Lebanese Academic Medical Center: a Cross-Sectional Study. *Acad Psychiatry*. 2016;40(1 PG-38-45):38-45. doi:<http://dx.doi.org/10.1007/s40596-015-0400-3>
99. Pereira-Lima K, Loureiro SR. Burnout, anxiety, depression, and social skills in medical residents. *Psychol Health Med*. 2015;20(3 PG-353-362):353-362.

- doi:<http://dx.doi.org/10.1080/13548506.2014.936889>
100. See KC, Lim TK, Kua EH, Phua J, Chua GS, Ho KY. Stress and Burnout among Physicians: Prevalence and Risk Factors in a Singaporean Internal Medicine Programme. *Ann Acad Med Singapore*. 2016;45(10 PG-471-474):471-474. <http://ovidsp.ovid.com/ovidweb.cgi?T=JS&PAGE=reference&D=med8&NEWS=N&AN=27832222 NS> -.
  101. Jovanovic N, Podlesek A, Volpe U, et al. Burnout syndrome among psychiatric trainees in 22 countries: Risk increased by long working hours, lack of supervision, and psychiatry not being first career choice. *Eur Psychiatry*. 2016;32(PG-34-41):34-41. doi:10.1016/j.eurpsy.2015.10.007
  102. Miyoshi R, Matsuo H, Takeda R, Komatsu H, Abe H, Ishida Y. Burnout in Japanese residents and its associations with temperament and character. *Asian J Psychiatry*. 2016;24(PG-5-9):5-9. doi:<http://dx.doi.org/10.1016/j.ajp.2016.08.009>
  103. Torppa MA, Kuikka L, Nevalainen M, Pitkala KH. Emotionally exhausting factors in general practitioners' work. *Scand J Prim Health Care*. 2015;33(3 PG-178-183):178-183. doi:10.3109/02813432.2015.1067514
  104. De Oliveira Jr GS, Chang R, Fitzgerald PC, et al. The prevalence of burnout and depression and their association with adherence to safety and practice standards: A survey of united states anesthesiology trainees. *Anesth Analg*. 2013;117(1 PG-182-193):182-193. doi:<http://dx.doi.org/10.1213/ANE.0b013e3182917da9>
  105. Ruitenburg MM, Frings-Dresen MH, Sluiter JK. The prevalence of common mental disorders among hospital physicians and their association with self-reported work ability: a cross-sectional study. *BMC Health Serv Res*. 2012;12(1):292. doi:10.1186/1472-6963-12-292
  106. Ringrose R, Houterman S, Koops W, Oei G. Burnout in medical residents: A questionnaire and interview study. *Psychol Heal Med*. 2009;14(4 PG-476-486):476-486. doi:<http://dx.doi.org/10.1080/13548500903012822>
  107. McNeeley MF, Perez FA, Chew FS. The emotional wellness of radiology trainees: Prevalence and predictors of burnout. *Acad Radiol*. 2013;20(5 PG-647-655):647-655. doi:<http://dx.doi.org/10.1016/j.acra.2012.12.018>
  108. Porrino J, Mulcahy MJ, Mulcahy H, Relyea-Chew A, Chew FS. Emotional Wellness of Current Musculoskeletal Radiology Fellows. *Acad Radiol*. 2017;24(6 PG-682-693):682-693. doi:<http://dx.doi.org/10.1016/j.acra.2016.12.024>
  109. Baer TE, Feraco AM, Tuysuzoglu Sagalowsky S, Williams D, Litman HJ, Vinci RJ. Pediatric Resident Burnout and Attitudes Toward Patients. *Pediatrics*. 2017;139(3 PG-). doi:<https://dx.doi.org/10.1542/peds.2016-2163>
  110. Mordant P, Deneuve S, Rivera C, et al. Quality of Life of Surgical Oncology Residents and Fellows Across Europe. *J Surg Educ*. 2014;71(2 PG-222-228):222-228. doi:10.1016/j.jsurg.2013.07.010
  111. Shanafelt TD, Raymond M, Horn L, et al. Oncology Fellows' Career Plans, Expectations, and Well-Being: Do Fellows Know What They Are Getting Into? *J Clin Oncol*. 2014;32(27 PG-2991-+):2991-+. doi:10.1200/jco.2014.56.2827
  112. Simpkin AL, Khan A, West DC, et al. Stress From Uncertainty and Resilience Among Depressed and Burned Out Residents: A Cross-Sectional Study. *Acad Pediatr*. 2018;(PG-). doi:<http://dx.doi.org/10.1016/j.acap.2018.03.002>
  113. Trockel M, Bohman B, Lesure E, et al. A Brief Instrument to Assess Both Burnout and

- Professional Fulfillment in Physicians: Reliability and Validity, Including Correlation with Self-Reported Medical Errors, in a Sample of Resident and Practicing Physicians. *Acad Psychiatry*. 2018;42(1 PG-11-24):11-24. doi:<https://dx.doi.org/10.1007/s40596-017-0849-3>
114. van Vendeloo SN, Brand PLP, Verheyen CCPM. Burnout and quality of life among orthopaedic trainees in a modern educational programme: importance of the learning climate. *Bone Joint J*. 2014;96-B(8 PG-1133-8):1133-1138. doi:<https://dx.doi.org/10.1302/0301-620X.96B8.33609>
  115. Prins JT, Hoekstra-Weebers J, van de Wiel HBM, Gazendam-Donofrio SM, Sprangers F, Jaspers FCA. Burnout among Dutch medical residents. *Int J Behav Med*. 2007;14(3 PG-119-125):119-125. doi:10.1007/bf03000182
  116. Prins JT, Hoekstra-Weebers JEHM, Gazendam-Donofrio SM, et al. Burnout and engagement among resident doctors in the Netherlands: a national study. *Med Educ*. 2010;44(3 PG-236-47):236-247. doi:<https://dx.doi.org/10.1111/j.1365-2923.2009.03590.x>
  117. van der Wal RAB, Bucx MJL, Hendriks JCM, Scheffer GJ, Prins JB. Psychological distress, burnout and personality traits in Dutch anaesthesiologists A survey. *Eur J Anaesthesiol*. 2016;33(3 PG-179-186):179-186. doi:10.1097/eja.0000000000000375
  118. van Vendeloo SN, Prins DJ, Verheyen C, et al. The learning environment and resident burnout: a national study. *Perspect Med Educ*. 2018;7(2 PG-120-125):120-125. doi:10.1007/s40037-018-0405-1
  119. van Vendeloo SN, Godderis L, Brand PLP, Verheyen K, Rowell SA, Hoekstra H. Resident burnout: evaluating the role of the learning environment. *Bmc Med Educ*. 2018;18(PG-). doi:10.1186/s12909-018-1166-6
  120. Block L, Wu AW, Feldman L, Yeh H-C, Desai S V. Residency schedule, burnout and patient care among first-year residents. *Postgrad Med J*. 2013;89(1055 PG-495-500):495-500. doi:<https://dx.doi.org/10.1136/postgradmedj-2012-131743>
  121. Lebares CC, Guvva E V, Ascher NL, O'Sullivan PS, Harris HW, Epel ES. Burnout and Stress Among US Surgery Residents: Psychological Distress and Resilience. *J Am Coll Surg*. 2018;226(1 PG-80-90):80-90. doi:<http://dx.doi.org/10.1016/j.jamcollsurg.2017.10.010>
  122. Shakir HJ, McPheeters MJ, Shallwani H, Pittari JE, Reynolds RM. The Prevalence of Burnout Among US Neurosurgery Residents. *Neurosurgery*. 2017;(PG-). doi:<https://dx.doi.org/10.1093/neuros/nyx494>
  123. Huggard P, Dixon R. "Tired of caring": The impact of caring on resident doctors. *Australas J Disaster Trauma Stud*. 2011;2011(3 PG-105-111):105-111. <http://ovidsp.ovid.com/ovidweb.cgi?T=JS&PAGE=reference&D=psyc8&NEWS=N&AN=2012-03764-004 NS> -.
  124. Low JM, Tan MY, See KC, Aw MM. Sleep, activity and fatigue reported by postgraduate year 1 residents: a prospective cohort study comparing the effects of night-float versus traditional overnight on-call. *Singapore Med J*. 2018;(PG-). doi:<https://dx.doi.org/10.11622/smedj.2018036>
  125. Markwell AL, Wainer Z. The health and wellbeing of junior doctors: insights from a national survey. *Med J Aust*. 2009;191(8 PG-441-4):441-444. <http://ovidsp.ovid.com/ovidweb.cgi?T=JS&PAGE=reference&D=med6&NEWS=N&AN=19835538 NS> -.
  126. Cooke GP, Doust JA, Steele MC. A survey of resilience, burnout, and tolerance of

- 1  
2  
3 uncertainty in Australian general practice registrars. *BMC Med Educ.* 2013;13(PG-2):2.  
4 doi:<http://dx.doi.org/10.1186/1472-6920-13-2>
- 5 127. Kealy D, Halli P, Ogrodniczuk JS, Hadjipavlou G. Burnout among Canadian Psychiatry  
6 Residents: A National Survey. *Can J Psychiatry.* 2016;61(11 PG-732-736):732-736.  
7 doi:<http://dx.doi.org/10.1177/0706743716645286>
- 8 128. Lambden JP, Chamberlin P, Kozlov E, et al. Association of Perceived Futile or Potentially  
9 Inappropriate Care With Burnout and Thoughts of Quitting Among Health-Care  
10 Providers. *Am J Hosp Palliat Care.* 2018;(PG-1049909118792517):1049909118792517.  
11 doi:<https://dx.doi.org/10.1177/1049909118792517>
- 12 129. Leach PK, Nygaard RM, Chipman JG, Brunsvold ME, Marek AP. Impostor Phenomenon  
13 and Burnout in General Surgeons and General Surgery Residents. *J Surg Educ.* 2018;(PG-  
14 ). doi:<https://dx.doi.org/10.1016/j.jsurg.2018.06.025>
- 15 130. Raviola G, Machoki M, Mwaikambo E, Good MJD. HIV, disease plague, demoralization  
16 and "burnout": resident experience of the medical profession in Nairobi,  
17 Kenya. *Cult Med Psychiatry.* 2002;26(1):55-86.  
18 <http://www.ncbi.nlm.nih.gov/pubmed/12088098>. Accessed June 29, 2019.
- 19 131. Robertson SL, Robinson MD, Reid A. Electronic Health Record Effects on Work-Life  
20 Balance and Burnout Within the I3 Population Collaborative. *J Grad Med Educ.* 2017;9(4  
21 PG-479-484):479-484. doi:<http://dx.doi.org/10.4300/JGME-D-16-00123.1>
- 22 132. Schweitzer B. Stress and burnout in junior doctors. *S Afr Med J.* 1994;84(6 PG-352-  
23 4):352-354.  
24 <http://ovidsp.ovid.com/ovidweb.cgi?T=JS&PAGE=reference&D=med3&NEWS=N&AN=7740383> NS -.
- 25  
26  
27  
28  
29  
30  
31  
32  
33  
34  
35  
36  
37  
38  
39  
40  
41  
42  
43  
44  
45  
46  
47  
48  
49  
50  
51  
52  
53  
54  
55  
56  
57  
58  
59  
60

Figure 1: Forest plot of studies included in the meta-analysis  
Part 1 of 2

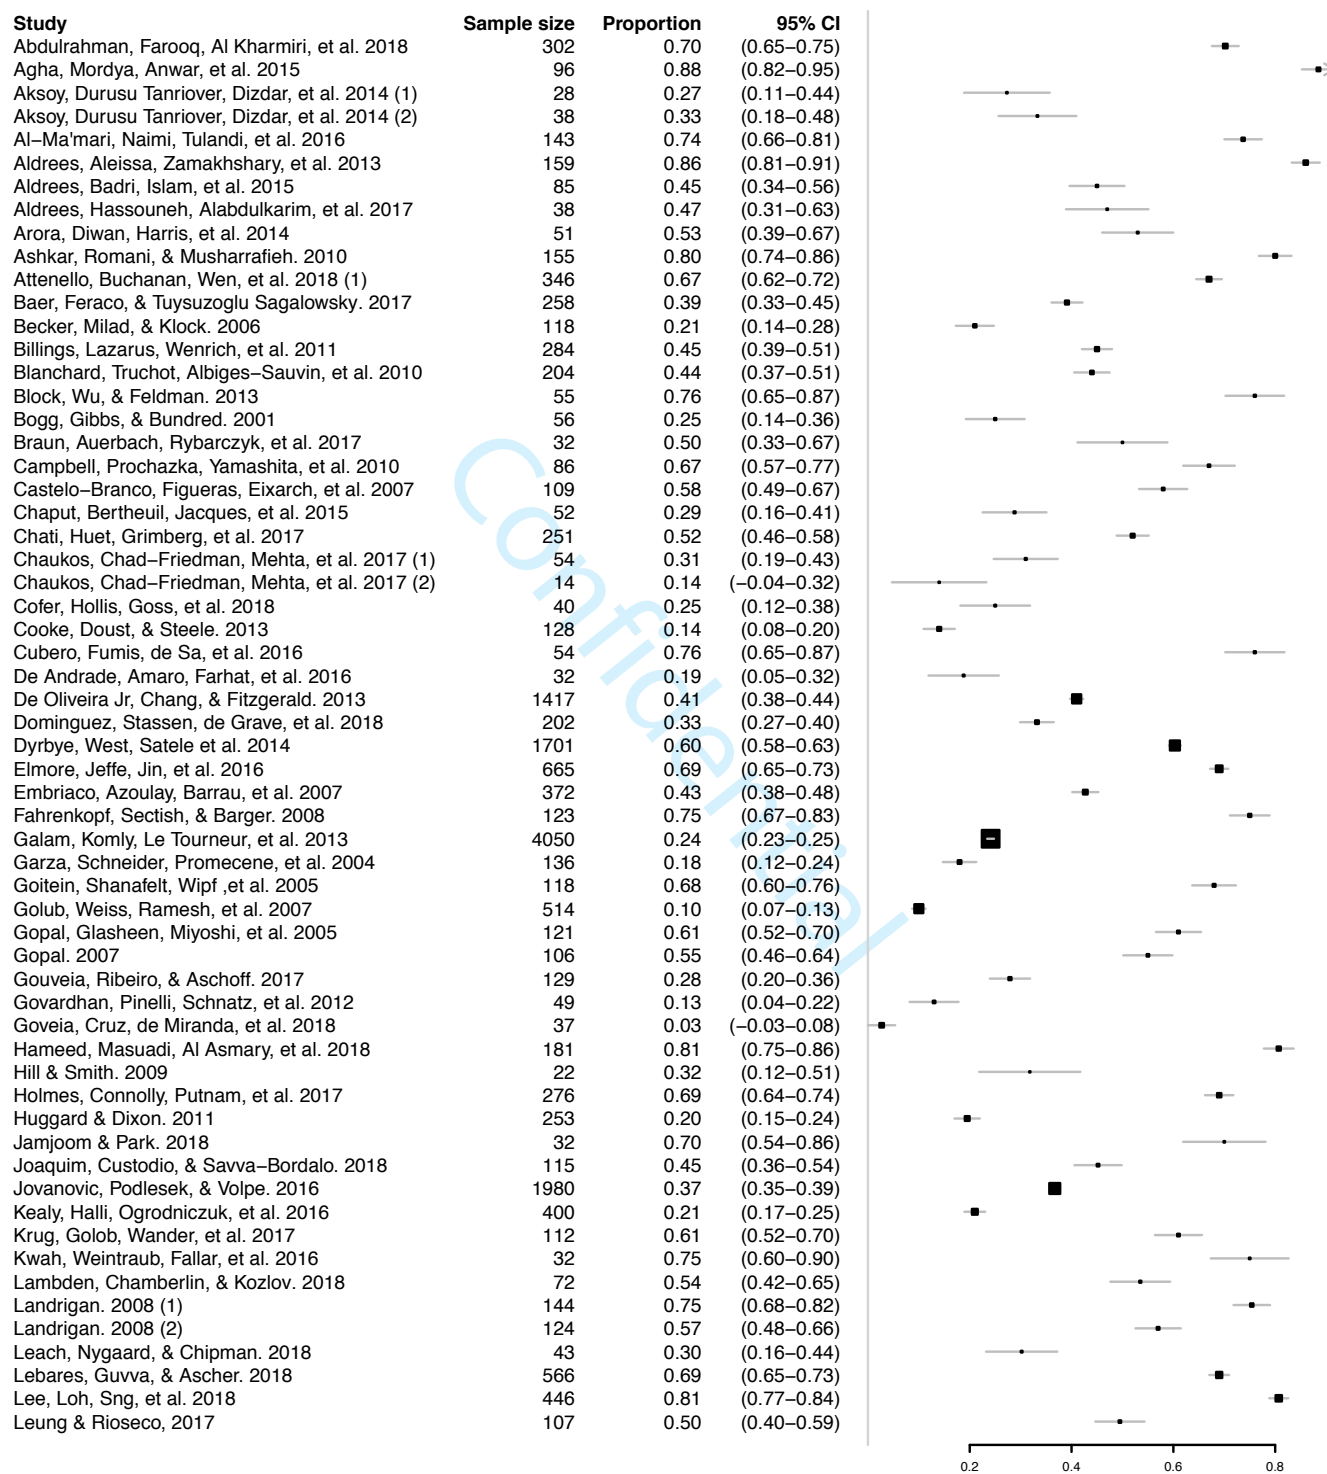

Figure 1: Forest plot of studies included in the meta-analysis

## Part 2 of 2

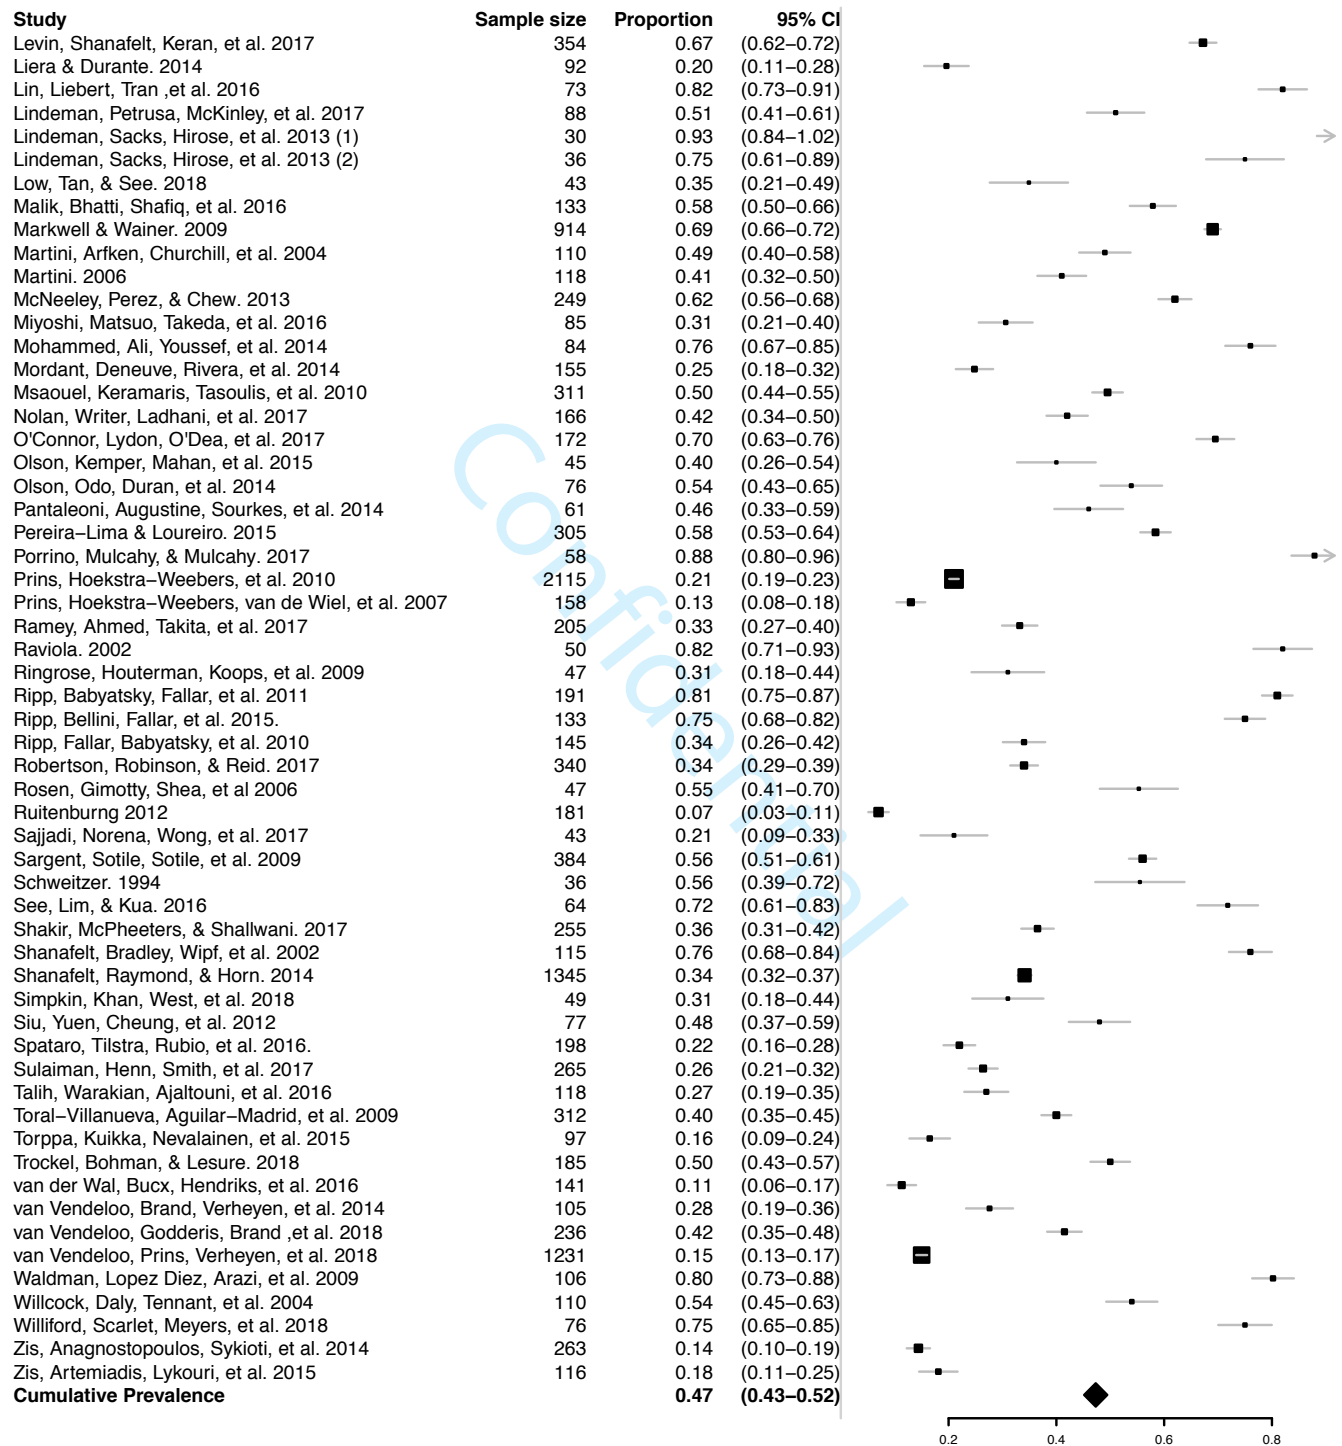

1  
2  
3  
4  
5  
6  
7  
8  
9  
10  
11  
12  
13  
14  
15  
16  
17  
18  
19  
20  
21  
22  
23  
24  
25  
26  
27  
28  
29  
30  
31  
32  
33  
34  
35  
36  
37  
38  
39  
40  
41  
42  
43  
44  
45  
46  
47  
48  
49  
50  
51  
52  
53  
54  
55  
56  
57  
58  
59  
60

**Supplementary Material**

Supplementary Table 1: Sample Search Strategy

Supplementary Table 2: Characteristics of the 197 studies included in systematic review

Supplementary Figure 1: The Preferred Reporting Items for Systematic Reviews and Meta-Analyses (PRISMA) Flow Diagram

Confidential



Appendix Table 1: Sample Search Strategy

| Database | Search Terms                                                                                                                                                                                                                                                                                                                                                                                                                                                                                                                                                                                                                                                                                                                                                                                                                                                                                                                                                                                                                                                 | Yield |
|----------|--------------------------------------------------------------------------------------------------------------------------------------------------------------------------------------------------------------------------------------------------------------------------------------------------------------------------------------------------------------------------------------------------------------------------------------------------------------------------------------------------------------------------------------------------------------------------------------------------------------------------------------------------------------------------------------------------------------------------------------------------------------------------------------------------------------------------------------------------------------------------------------------------------------------------------------------------------------------------------------------------------------------------------------------------------------|-------|
| EMBASE   | 1 exp job stress/<br>2 burnout/<br>3 stress/ or acute stress/ or emotional stress/ or mental stress/<br>or role stress/<br>4 emotional disorder/<br>5 depersonalization/<br>6 deperson*.ti,ab,kw.<br>7 ((emotional* or mental* or physical*) adj2 (fatigue* or<br>exhaust* or drain* or distress*)).ti,ab,kw.<br>8 burnout.ti,ab,kw.<br>9 (stress* adj2 (psychological or emotional or mental or<br>professional or job or work or occupational)).ti,ab,kw.<br>10 compassion fatigue.ti,ab,kw.<br>11 (cynicism or cynical).ti,ab,kw.<br>12 exhaustion/ or fatigue/<br>13 or/1-12<br>14 residency education/<br>15 (intern or interns or internship).ti,ab,kw.<br>16 (resident or residents or residency).ti,ab,kw.<br>17 housemanship*.ti,ab,kw.<br>18 house staff.ti,ab,kw.<br>19 housestaff.ti,ab,kw.<br>20 ((physician or doctor) adj2 training).ti,ab,kw.<br>21 (junio?r doctor* or foundation doctor* or house<br>officer*).ti,ab,kw.<br>22 or/14-21<br>23 13 and 22<br>24 23 not (animals/ not (humans/ and animals/))<br>25 remove duplicates from 24 | 5178  |

Appendix Table 2: Characteristics of the 197 studies included in systematic review

| Author                               | Country              | Region        | No. of Residents | Age                  | Males No. (%) | Specialty                      | Year of Survey | Tool to Measure Burnout | Experiencing Burnout (%) | Definition of Burnout   |
|--------------------------------------|----------------------|---------------|------------------|----------------------|---------------|--------------------------------|----------------|-------------------------|--------------------------|-------------------------|
| Abdulrahman et al, 2018 <sup>1</sup> | United Arab Emirates | ME & NA       | 302              | NR                   | 63 (21.0)     | Multiple                       | 2016           | MBI                     | 70.20%                   | High EE or DP           |
| Afzal et al, 2010 <sup>2</sup>       | USA                  | North America | 115              | NR                   | 67 (58.0)     | Multiple                       | 2008           | MBI                     | NR                       | NR                      |
| Agha et al, 2015 <sup>3</sup>        | Saudi Arabia         | ME & NA       | 96               | NR                   | 64 (67)       | Multiple                       | NS             | MBI                     | 88.54%                   | High EE or DP or low PA |
| Akdeniz et al, 2011 <sup>4</sup>     | Turkey               | Asia          | 174              | Mean : 32.2, SD: 4.5 | 74 (42.4)     | General Practice               | 2008           | MBI                     | NR                       | NR                      |
| Aksoy et al, 2014 <sup>5</sup>       | Turkey               | Asia          | 28               | Mean : 25.9, SD: 2.0 | 10 (47)       | Pediatrics                     | NS             | MBI                     | 27.27%                   | High EE or DP           |
| Aksoy et al, 2014 <sup>5</sup>       | Turkey               | Asia          | 38               | Mean : 26.6, SD: 1.5 | 16 (47)       | Internal Medicine              | NS             | MBI                     | 33.33%                   | High EE or DP           |
| Al Atassi et al, 2018 <sup>6</sup>   | USA                  | North America | 238              | NR                   | 190 (80.0)    | Oral and Maxillofacial Surgery | 2017           | MBI                     | NR                       | NR                      |
| Al-Dubai et al, 2013 <sup>7</sup>    | Malaysia             | Asia          | 191              | Mean : 26.5, SD: 1.6 | 85 (44.5)     | Multiple                       | NS             | MBI                     | NR                       | NR                      |
| Al-Ma'mari et al, 2016 <sup>8</sup>  | Canada               | North America | 143              | NR                   | 19 (13.0)     | Obstetrics and Gynecology      | NS             | MBI                     | 73.70%                   | High EE or DP or low PA |
| Aldrees et al, 2013 <sup>9</sup>     | Saudi Arabia         | ME & NA       | 159              | NR                   | NR            | Multiple                       | 2010           | MBI                     | 86.00%                   | High EE or DP or low PA |
| Aldrees et al, 2015 <sup>10</sup>    | Saudi Arabia         | ME & NA       | 85               | Mean : 29, SD: 2.3   | 57 (67)       | Otolaryngology                 | 2013           | MBI                     | 45.00%                   | High EE and DP          |

|                                     |              |                         |     |                      |            |                           |      |                                                    |        |                         |
|-------------------------------------|--------------|-------------------------|-----|----------------------|------------|---------------------------|------|----------------------------------------------------|--------|-------------------------|
| Aldrees et al, 2017 <sup>11</sup>   | Saudi Arabia | ME & NA                 | 38  | Mean : 28, SD 1.9    | 28 (74)    | Plastic Surgery           | 2015 | MBI                                                | 47.00% | High EE and DP          |
| Anil et al, 2017 <sup>12</sup>      | Turkey       | Asia                    | 71  | Mean : 27.8, SD: 1.7 | 24 (33)    | Pediatrics                | 2010 | MBI                                                | NR     | NR                      |
| Antiel et al, 2013 <sup>13</sup>    | USA          | North America           | 156 | NR                   | 106 (68.0) | General surgery           | 2012 | Modified MBI (2-Single Item Measures of EE and DP) | NR     | NR                      |
| Arora et al, 2014 <sup>14</sup>     | Australia    | Australia & New Zealand | 51  | NR                   | NR         | Orthopedic Surgery        | 2012 | MBI                                                | 53.00% | High EE or DP           |
| Ashkar et al, 2010 <sup>15</sup>    | Lebanon      | ME & NA                 | 155 | NR                   | 86 (55.5)  | Multiple                  | 2008 | MBI                                                | 80.00% | High EE or DP or low PA |
| Attenello et al, 2018 <sup>16</sup> | USA          | North America           | 346 | NR                   | 270 (78.0) | Neurosurgery              | 2015 | MBI                                                | 67.00% | High EE or DP           |
| Baer et al, 2017 <sup>17</sup>      | USA          | North America           | 258 | Mean : 29.4, SD: 2.3 | 54 (21.1)  | Pediatrics                | 2013 | Modified MBI (2-Single Item Measures of EE and DP) | 39.10% | High EE or DP           |
| Barrack et al, 2006 <sup>18</sup>   | USA          | North America           | 34  | Mean : 30.5, SD: 2.6 | 29 (85)    | Orthopedic Surgery        | 2005 | MBI                                                | NR     | NR                      |
| Becker et al, 2006 <sup>19</sup>    | USA          | North America           | 118 | Mean : 29.3, SD: 3   | 25 (20.8)  | Obstetrics and Gynecology | 2004 | MBI                                                | 21.00% | High EE + DP            |
| Beckman et al, 2010 <sup>20</sup>   | USA          | North America           | 131 | NR                   | 82 (62.7)  | Internal Medicine         | 2007 | MBI                                                | NR     | NR                      |
| Beckman et al, 2011 <sup>21</sup>   | USA          | North America           | 202 | NR                   | 116 (57.4) | Internal Medicine         | 2009 | MBI                                                | NR     | High EE or DP           |

|                                     |             |               |     |                                                                    |            |                   |              |                                              |        |                             |
|-------------------------------------|-------------|---------------|-----|--------------------------------------------------------------------|------------|-------------------|--------------|----------------------------------------------|--------|-----------------------------|
| Belayachi et al, 2016 <sup>22</sup> | Morocco     | Africa        | 198 | Mean : 29.3, SD: 3.2                                               | 82 (41.4)  | Multiple          | 2010         | MBI                                          | NR     | NR                          |
| Bellolio et al, 2014 <sup>23</sup>  | USA         | North America | 188 | NR                                                                 | 34 (18.0)  | Multiple          | NS           | Professional Quality of Life Scale Version 5 | NR     | >=42                        |
| Biaggi et al, 2003 <sup>24</sup>    | Switzerland | Europe        | 60  | 33.7 (total) ; residents (n=39), 31; chief residents (n=21): 38.6. | 36 (60)    | Multiple          | 2000         | Seven point scale                            | 41.70% | NR                          |
| Billings et al, 2011 <sup>25</sup>  | USA         | North America | 284 | NR                                                                 | 131 (46.0) | Internal Medicine | 2008 to 2010 | MBI                                          | 45.00% | High EE or DP               |
| Blanchard et al, 2010 <sup>26</sup> | France      | Europe        | 204 | NR                                                                 | 82 (40.0)  | Oncology          | 2009         | MBI                                          | 44.00% | High EE or DP               |
| Block et al, 2013 <sup>27</sup>     | USA         | North America | 55  | Mean : 29, SD: 3                                                   | 29 (53)    | Internal Medicine | 2011         | Modified MBI (6 items)                       | 76.00% | NS                          |
| Bogg et al, 2001 <sup>28</sup>      | England     | Europe        | 56  | NR                                                                 | NR         | Multiple          | NS           | MBI                                          | 25.00% | High EE, high DP and low PA |
| Bragard et al, 2010 <sup>29</sup>   | Belgium     | Europe        | 102 | NR                                                                 | NR         | Multiple          | NS           | MBI                                          | NR     | NR                          |
| Bragard et al, 2012 <sup>30</sup>   | Belgium     | Europe        | 113 | Mean : 28, SD: 2.9                                                 | 28 (25.0)  | Multiple          | 2002 to 2006 | MBI                                          | NR     | NR                          |
| Brant et al, 2010 <sup>31</sup>     | England     | Europe        | 36  | Mean : 25, Range: 23-30                                            | 15 (42)    | NR                | 2005 to 2007 | MBI                                          | NR     | NR                          |
| Braun et al, 2017 <sup>32</sup>     | USA         | North America | 32  | Mean : 28.59                                                       | 25 (79)    | Internal Medicine | 2014         | MBI                                          | 50.00% | High EE or DP               |

|                                          |           |                         |                        |                            |            |                           |              |                              |        |                                   |
|------------------------------------------|-----------|-------------------------|------------------------|----------------------------|------------|---------------------------|--------------|------------------------------|--------|-----------------------------------|
|                                          |           |                         |                        | , SD:<br>2.69              |            |                           |              |                              |        |                                   |
| Campbell et al, 2010 <sup>33</sup>       | USA       | North America           | 86                     | NR                         | 44 (51)    | Internal Medicine         | 2003 to 2008 | MBI                          | 67.00% | High EE or DP                     |
| Castelo-Branco et al, 2007 <sup>34</sup> | Spain     | Europe                  | 109                    | Mean : 27, SD: 2.3         | 15 (14.0)  | Obstetrics and Gynecology | 2004         | MBI                          | 58.00% | High EE or DP                     |
| Chaput et al, 2015 <sup>35</sup>         | France    | Europe                  | 52                     | Mean : 28.9, Range 25-34   | 26 (50)    | Plastic surgery           | 2013         | MBI                          | 28.80% | High EE or DP                     |
| Chati et al, 2017 <sup>36</sup>          | France    | Europe                  | 251                    | Mean : 29.5, SD: 2.7       | 144 (57.5) | General Surgery           | 2013         | MBI                          | 52.00% | High EE or DP                     |
| Chaukos et al, 2017 <sup>37</sup>        | USA       | North America           | 54                     | NR                         | 21 (40)    | Internal Medicine         | NS           | MBI                          | 31.00% | High EE or DP                     |
| Chaukos et al, 2017 <sup>37</sup>        | USA       | North America           | 14                     | NR                         | 6 (40)     | Psychiatry                | NS           | MBI                          | 14.00% | High EE or DP                     |
| Chen et al, 2013 <sup>38</sup>           | Taiwan    | Asia                    | 278                    | NR                         | NR         | Multiple                  | 2012         | MBI                          | NR     | High EE or DP                     |
| Choi et al, 2017 <sup>39</sup>           | USA       | North America           | 2011 (507), 2013 (520) | NR                         |            | Multiple                  | 2011 & 2013  | Single item measure          | NR     | NR                                |
| Cofer et al, 2018 <sup>40</sup>          | USA       | North America           | 40                     | NR                         | 27 (68)    | General Surgery           | 2016         | MBI                          | 25.00% | 2/3 of high EE, high DP or low PA |
| Coluccia, et al, 2017 <sup>41</sup>      | Italy     | Europe                  | 41                     | NR                         | 17 (42)    | Psychiatry                | 2016         | MBI                          | NR     | NR                                |
| Cooke et al, 2013 <sup>42</sup>          | Australia | Australia & New Zealand | 128                    | NR                         | NR         | General Practice          | 2010         | Single item measure          | 14.00% | Selecting statements 3-5          |
| Creed et al, 2014 <sup>43</sup>          | Australia | Australia & New Zealand | 355                    | Mean : 28.06, Range: 21-58 | 111 (31.2) | NR                        | NR           | Copenhagen Burnout Inventory | NR     | NR                                |
| Cubero et al, 2016 <sup>44</sup>         | Brazil    | South America           | 54                     | NR                         | 29 (54)    | Oncology                  | 2010         | MBI                          | 76.00% | High EE or DP                     |

|                                          |          |               |      |                           |            |                   |             |                                                     |        |                                         |
|------------------------------------------|----------|---------------|------|---------------------------|------------|-------------------|-------------|-----------------------------------------------------|--------|-----------------------------------------|
| Dahlin et al, 2010 <sup>45</sup>         | Sweden   | Europe        | 186  | Mean : 27.4, SD: 4        | 75 (40.3)  | NR                | 2003 & 2006 | Oldenburg Burnout Inventory                         | NR     | NR                                      |
| De Andrade et al, 2016 <sup>46</sup>     | Brazil   | South America | 32   | NR                        | 7 (22)     | Pediatrics        | 2009        | MBI                                                 | 18.80% | High EE and DP                          |
| De Oliveira Jr et al, 2013 <sup>47</sup> | USA      | North America | 1417 | NR                        | 808 (57.0) | Anesthesia        | NR          | Modified MBI (12 questions)                         | 41.00% | Moderate or high in 2/3 of EE, DP or PA |
| Demirci et al, 2010 <sup>48</sup>        | Turkey   | Asia          | 11   | NR                        | NR         | NR                | 2006        | MBI                                                 | NR     | High EE or DP                           |
| Dikmetas et al, 2011 <sup>49</sup>       | Turkey   | Asia          | 270  | Mean : 30, SD/R range: NR | 178 (65.9) | Multiple          | 2009        | MBI                                                 | NR     | High EE or DP or low PA                 |
| Dominguez et al, 2018 <sup>50</sup>      | Colombia | South America | 202  | Mean : 28.63, SD: 2.96    | 129 (63.9) | NR                | 2015        | MBI                                                 | 33.20% | High EE and 1 of high DP or low PA)     |
| Doolittle et al, 2013 <sup>51</sup>      | USA      | North America | 108  | Mean : 30, SD: 4.8        | 54 (50.0)  | Multiple          | 2010        | MBI                                                 | NR     | NR                                      |
| Durning et al, 2013 <sup>52</sup>        | USA      | North America | 17   | Mean : 29.6, SD: 2        | 10 (59)    | Internal Medicine | NR          | Modified MBI (2- Single Item Measures of EE and DP) | NR     | NR                                      |
| Dyrbye et al, 2014 <sup>53</sup>         | USA      | North America | 1701 | NR                        | 827 (48.6) | Multiple          | 2012        | MBI                                                 | 60.30% | High EE or DP                           |
| Elmore et al, 2016 <sup>54</sup>         | USA      | North America | 665  | Mean : 30.3, SD: 3.3      | 375 (56.4) | General Surgery   | 2014        | MBI                                                 | 69.00% | High EE or DP or low PA                 |
| Embriaco et al, 2007 <sup>55</sup>       | France   | Europe        | 372  | NR                        | NR         | NR                | 2004        | MBI                                                 | 42.70% | Total score between -8 to +34           |
| Fahrenkopf et al, 2008 <sup>56</sup>     | USA      | North America | 123  | NR                        | 37 (30.0)  | NR                | 2003        | MBI                                                 | 75.00% | High EE and DP                          |

|                                         |         |               |      |                            |             |                                                         |      |                            |        |                                   |
|-----------------------------------------|---------|---------------|------|----------------------------|-------------|---------------------------------------------------------|------|----------------------------|--------|-----------------------------------|
| Ferreira et al, 2012 <sup>57</sup>      | Brazil  | South America | 12   | NR                         | NR          | NR                                                      | 2011 | Burnout Syndrome Inventory | NR     | NR                                |
| Fulop et al, 2011 <sup>58</sup>         | Hungary | Europe        | 67   | Mean : 31.45<br>SD: 5.79   | 16 (24)     | NR                                                      | 2011 | MBI                        | NR     | NR                                |
| Galam et al, 2013 <sup>59</sup>         | France  | Europe        | 4050 | Mean : 26.4,<br>SD: NR     | 1268 (31.3) | General Practitioner                                    | 2011 | MBI                        | 24.10% | 2/3 of high EE, high DP or low PA |
| Garza et al, 2004 <sup>60</sup>         | USA     | North America | 136  | NR                         | 39 (29.0)   | Obstetrics and Gynecology                               | NR   | MBI                        | 18.00% | High EE, DP and low PA            |
| Geelan-Hansen et al, 2018 <sup>61</sup> | USA     | North America | 14   | NR                         | NR          | NR                                                      | NR   | MBI                        | NR     | NR                                |
| Gelfand et al, 2004 <sup>62</sup>       | USA     | North America | 26   | NR                         | NR          | Gen surg (and some off service PGY1 surgical residents) | 2003 | MBI                        | NR     | High EE, high DP and low PA       |
| Goitein et al, 2005 <sup>63</sup>       | USA     | North America | 118  | NR                         | 55 (47.0)   | Internal Medicine                                       | 2004 | MBI                        | 68.00% | High EE or DP                     |
| Golub et al, 2007 <sup>64</sup>         | USA     | North America | 514  | Mean : 31,<br>Range: 24-45 | 406 (79.0)  | Otolaryngology                                          | 2005 | MBI                        | 10.00% | High EE, high DP and low PA       |
| Gopal et al, 2005 <sup>65</sup>         | USA     | North America | 121  | NR                         | 58 (48.0)   | Internal Medicine                                       | 2003 | MBI                        | 61.00% | High EE or DP                     |
| Gopal et al, 2007 <sup>66</sup>         | USA     | North America | 106  | NR                         | 45 (42.5)   | Internal medicine                                       | 2004 | MBI                        | 55.00% | High EE or DP                     |
| Gouveia et al, 2017 <sup>67</sup>       | Brazil  | South America | 129  | NR                         | 62 (48.1)   | Multiple                                                | 2015 | MBI                        | 27.90% | High EE, high DP and low PA       |
| Govardhan et al, 2012 <sup>68</sup>     | USA     | North America | 49   | Mean : 30.1,<br>SD: 3      | 4 (9)       | Obstetrics and Gynecology                               | 2009 | MBI                        | 13.00% | High EE, high DP and low PA       |

|                                     |                |                         |     |                             |            |                    |              |                              |        |                             |
|-------------------------------------|----------------|-------------------------|-----|-----------------------------|------------|--------------------|--------------|------------------------------|--------|-----------------------------|
| Gouveia et al, 2018 <sup>69</sup>   | Brazil         | South America           | 37  | Mean : 30, SD: 2.9          | NR         | Anesthesia         | 2014 to 2015 | MBI                          | 2.70%  | High EE, high DP and low PA |
| Guenette et al, 2017 <sup>70</sup>  | USA            | North America           | 94  | NR                          | 59 (63)    | Radiology          | 2016         | MBI                          | NR     | High EE, high DP and low PA |
| Guenette et al, 2018 <sup>71</sup>  | USA            | North America           | 314 | Mean : 31.1, SD: 2.8        | 217 (69.0) | Radiology          | 2017         | MBI                          | NR     | Low PA                      |
| Gulen et al, 2016 <sup>72</sup>     | Turkey         | Asia                    | 48  | Mean : 30.5, SD: 3.2        | 26 (55)    | Emergency Medicine | 2015         | MBI                          | NR     | NR                          |
| Guthrie et al, 1999 <sup>73</sup>   | England        | Europe                  | 64  | NR                          | 31 (48)    | Psychiatry         | NR           | MBI                          | NR     | High EE, high DP and low PA |
| Halliday et al, 2017 <sup>74</sup>  | United Kingdom | Europe                  | 292 | HST 33, JST 28              | 128 (43.8) | NR                 | NR           | Oldenburg Burnout Inventory  | NR     | NR                          |
| Hameed et al, 2018 <sup>75</sup>    | Saudi Arabia   | ME & NA                 | 181 | Mean : 27.6, SD/R range: NR | 75 (41.4)  | Multiple           | 2013 to 2014 | MBI                          | 80.70% | High EE or DP               |
| Hannan et al, 2018 <sup>76</sup>    | Ireland        | Europe                  | 101 | Mean : 28, Range: 23-43     | 45 (44.4)  | NR                 | 2012 to 2014 | MBI                          | NR     | NR                          |
| Hausler et al, 2017 <sup>77</sup>   | Austria        | Europe                  | 136 | Mean : 32, SD: 4.8          | 47 (34.6)  | Multiple           | 2015 to 2016 | Modified MBI (21 items)      | NR     | NR                          |
| Henning et al, 2014 <sup>78</sup>   | New Zealand    | Australia & New Zealand | 17  | NR                          | 6 (35)     | NR                 | NR           | Copenhagen Burnout Inventory | NR     | NR                          |
| Hill et al, 2009 <sup>79</sup>      | USA            | North America           | 22  | NR                          | NR         | Otolaryngology     | 2006         | MBI                          | 31.82% | High EE and DP              |
| Hillhouse et al, 2000 <sup>80</sup> | USA            | North America           | 46  | Mean : 30.6,                | 31 (67)    | Multiple           | nr           | Staff Burnout Scale          | NR     | NR                          |



|    |                                           |                 |                                       |            |                                   |               |                           |                                    |                                                                 |        |                                       |
|----|-------------------------------------------|-----------------|---------------------------------------|------------|-----------------------------------|---------------|---------------------------|------------------------------------|-----------------------------------------------------------------|--------|---------------------------------------|
|    |                                           |                 |                                       | SD:<br>4.7 |                                   |               |                           | for<br>Health<br>Profess<br>ionals |                                                                 |        |                                       |
| 8  | Holmes et<br>al, 2017 <sup>81</sup>       | USA             | North<br>Americ<br>a                  | 276        | NR                                | 97<br>(35.0)  | Multipl<br>e              | 2014                               | MBI                                                             | 69.00% | High EE or<br>DP                      |
| 11 | Huggard<br>et al,<br>2011 <sup>82</sup>   | New<br>Zealand  | Austral<br>ia &<br>New<br>Zealan<br>d | 253        | Mean<br>:<br>31.1,<br>SD:<br>5.9  | 104<br>(41.1) | Multipl<br>e              | NR                                 | Profess<br>ional<br>Quality<br>of Life<br>Index<br>Version<br>3 | 19.50% | NR                                    |
| 17 | Hutter et<br>al, 2006 <sup>83</sup>       | USA             | North<br>Americ<br>a                  | 58         | NR                                | NR            | Multipl<br>e              | 2013 &<br>2014                     | MBI                                                             | NR     | NR                                    |
| 20 | Hwang et<br>al, 2018 <sup>84</sup>        | USA             | North<br>Americ<br>a                  | 45         | NR                                | 39<br>(87)    | Orthop<br>edic<br>Surgery | 2,011                              | MBI                                                             | NR     | High EE<br>and DP<br>and low<br>PA    |
| 24 | Hyman et<br>al, 2011 <sup>85</sup>        | USA             | North<br>Americ<br>a                  | 34         | NR                                | 20<br>(59)    | Multipl<br>e              | 2007                               | Modifi<br>ed MBI<br>NS                                          | NR     | High EE,<br>high DP,<br>and low<br>PA |
| 28 | Jamjoom<br>et al,<br>2018 <sup>86</sup>   | Saudi<br>Arabia | ME &<br>NA                            | 32         | NR                                | 2 (6)         | Pediatri<br>cs            | 2016                               | MBI                                                             | 70.00% | NR                                    |
| 31 | Jin et al,<br>2015 <sup>87</sup>          | China           | Asia                                  | 135        | NR                                | 66<br>(48.9)  | NR                        | 2008                               | MBI-<br>GS                                                      | NR     | NR                                    |
| 33 | Joaquim<br>et al,<br>2018 <sup>88</sup>   | Portugal        | Europe                                | 115        | Mean<br>:<br>28.4,<br>SD:<br>2.2  | 30<br>(26.3)  | Oncolo<br>gy              | 2011                               | MBI                                                             | 45.20% | NR                                    |
| 38 | Jovanovic<br>et al,<br>2016 <sup>89</sup> | Europe          | Europe                                | 1980       | Mean<br>:<br>31.9,<br>SD:<br>5.3  | 804<br>(40.6) | Psychia<br>try            | 2008 to<br>2012                    | MBI-<br>GS                                                      | 36.70% | High MBI-<br>EX and<br>MBI-CY         |
| 42 | Kang et<br>al, 2013 <sup>90</sup>         | South<br>Korea  | Asia                                  | 86         | NR                                | 64<br>(74)    | NR                        | 2010                               | MBI                                                             | NR     | NR                                    |
| 45 | Karaoglu<br>et al,<br>2015 <sup>91</sup>  | Turkey          | Asia                                  | 74         | Mean<br>:<br>27.6,<br>SD:<br>2.25 | 28<br>(41)    | Multipl<br>e              | 2011                               | Modifi<br>ed MBI<br>(21<br>items)                               | NR     | NR                                    |
| 49 | Kash et<br>al, 2000 <sup>92</sup>         | USA             | North<br>Americ<br>a                  | 76         | NR                                | 53<br>(70)    | Oncolo<br>gy              | NS                                 | MBI                                                             | NR     | NR                                    |
| 53 | Kassam<br>et al,<br>2015 <sup>93</sup>    | Canada          | North<br>Americ<br>a                  | 301        | Mean<br>:<br>30.9,<br>SD:<br>4.3  | 119<br>(39.4) | NR                        | 2012                               | Copenh<br>agen<br>Burnou<br>t                                   |        | NR                                    |

|                                      |           |               |     |                       |            |                   |              |                                                     |        |                             |
|--------------------------------------|-----------|---------------|-----|-----------------------|------------|-------------------|--------------|-----------------------------------------------------|--------|-----------------------------|
|                                      |           |               |     |                       |            |                   |              | Invento<br>ry                                       |        |                             |
| Kealy et al, 2016 <sup>94</sup>      | Canada    | North America | 400 | NR                    | 123 (30.8) | Psychiatry        | 2014         | Single item measure                                 | 21.00% | Self-report                 |
| Kolarik et al, 2018 <sup>95</sup>    | USA       | North America | 161 | Mean : 29.6, SD: 2.9  | 83 (51.6)  | Multiple          | 2017         | Modified MBI (2- Single Item Measures of EE and DP) | NR     | NR                          |
| Komur et al, 2017 <sup>96</sup>      | Turkey    | Asia          | 54  | NR                    | NR         | Pathology         | NS           | MBI                                                 | NR     | NR                          |
| Krug et al, 2017 <sup>97</sup>       | USA       | North America | 112 | NR                    | 47 (42)    | Internal Medicine | 2012         | MBI                                                 | 61.00% | High EE or DP               |
| Kwah et al, 2016 <sup>98</sup>       | USA       | North America | 32  | NR                    | NR         | Internal Medicine | 2012         | MBI                                                 | 75.00% | High EE or DP               |
| Lambden et al, 2018 <sup>99</sup>    | USA       | North America | 72  | NR                    | NR         | Multiple          | 2017         | Single item measure                                 | 53.50% | >=3 on single-item question |
| Landrigan et al, 2008 <sup>100</sup> | USA       | North America | 213 | 30.2                  | 62 (29.3)  | Pediatrics        | 2003 & 2004  | MBI                                                 | 75.40% | High EE or DP               |
| Landrigan et al, 2008 <sup>100</sup> | USA       | North America | 213 | 29.1                  | 68 (31.7)  | Pediatrics        | 2003 & 2004  | MBI                                                 | 57.00% | High EE or DP               |
| Leach et al, 2018 <sup>101</sup>     | USA       | North America | 43  | NR                    | 27 (63)    | General Surgery   | 2017         | Single item measure                                 | 30.20% | >=3                         |
| Lebares et al, 2018 <sup>102</sup>   | USA       | North America | 566 | NR                    | 277 (49.0) | General Surgery   | 2016         | Modified MBI (9 items)                              | 68.95% | High EE or DP or low PA     |
| Lebensohn et al, 2013 <sup>103</sup> | USA       | North America | 168 | Median: 29.0, IQR: NR | 67 (40.1)  | Family Medicine   | 2012 to 2013 | MBI                                                 | NR     | NR                          |
| Lee et al, 2018 <sup>104</sup>       | Singapore | Asia          | 446 | Mean : 29.4, SD: 2.6  | 208 (46.6) | Multiple          | 2015         | MBI                                                 | 80.70% | High EE, DP or low PA       |
| Lemkau, 1987 <sup>105</sup>          | USA       | North America | 67  | Mean : 29.1,          | 53 (79)    | General Practice  | 1984         | MBI                                                 | NR     | NR                          |

|                                     |                        |                         |     |                          |            |                 |              |                                    |        |                           |
|-------------------------------------|------------------------|-------------------------|-----|--------------------------|------------|-----------------|--------------|------------------------------------|--------|---------------------------|
|                                     |                        |                         |     | SD:<br>3.8               |            |                 |              |                                    |        |                           |
| Leung et al, 2017 <sup>106</sup>    | Australia, New Zealand | Australia & New Zealand | 107 | Median: 31.4, IQR: NR    | 54 (50.0)  | Oncology        | 2015         | MBI                                | 49.50% | High EE or DP             |
| Levin et al, 2017 <sup>107</sup>    | USA                    | North America           | 354 | Mean: 33, SD: 4          | 182 (51.4) | Neurology       | 2016         | MBI                                | 67.20% | High EE or DP             |
| Lin et al, 2016 <sup>108</sup>      | USA                    | North America           | 73  | Mean: 30.8, SD: 3.22     | 42 (58)    | General Surgery | 2013 to 2014 | MBI                                | 82.00% | High EE or DP             |
| Lindeman et al, 2013 <sup>109</sup> | USA                    | North America           | 30  | Mean: 30, Range: 25-36   | 21 (70)    | General Surgery | 2011         | MBI                                | 93.00% | >=13                      |
| Lindeman et al, 2013 <sup>109</sup> | USA                    | North America           | 36  | Mean: 30, Range: 25-36   | 24 (67)    | General Surgery | 2012         | MBI                                | 75.00% | >=13                      |
| Lindeman et al, 2017 <sup>110</sup> | USA                    | North America           | 88  | NR                       | 46 (52)    | General Surgery | 2016         | MBI                                | 51.00% | High EE                   |
| Llera et al, 2014 <sup>111</sup>    | Argentina              | South America           | 92  | NR                       | 28 (30)    | Multiple        | 2011         | MBI                                | 19.60% | High EE and DP and low PA |
| Low et al, 2018 <sup>112</sup>      | Singapore              | Asia                    | 43  | Median: 25, Range: 25-27 | 18 (43)    | Multiple        | 2015         | Professional Quality of Life Scale | 34.88% | >=57                      |
| Lue et al, 2010 <sup>113</sup>      | Taiwan                 | Asia                    | 555 | Mean: 29.35, SD: 2.58    | 376 (67.7) | Multiple        | 2007         | Copenhagen Burnout Inventory       |        | NR                        |
| Malik et al, 2016 <sup>114</sup>    | Pakistan               | Asia                    | 133 | NR                       | 98 (73.7)  | Multiple        | NS           | MBI                                | 57.90% | High in 2 of EE, DP or PA |
| Markwell et al, 2009 <sup>115</sup> | Australia, New Zealand | Australia & New Zealand | 914 | NR                       | 402 (44.0) | Multiple        | 2008         | Professional Quality of Life Scale | 69.00% | NR                        |
| Martini et al, 2004 <sup>116</sup>  | USA                    | North America           | 110 | NR                       | NR         | Multiple        | 2003         | MBI                                | 49.00% | NR                        |

|                                       |             |                         |     |                           |            |                   |      |                                                       |        |                                                         |
|---------------------------------------|-------------|-------------------------|-----|---------------------------|------------|-------------------|------|-------------------------------------------------------|--------|---------------------------------------------------------|
| Martini et al, 2006 <sup>117</sup>    | USA         | North America           | 118 | NR                        | NR         | Multiple          | 2004 | MBI                                                   | 41.00% | NR                                                      |
| McNeeley et al, 2013 <sup>118</sup>   | USA         | North America           | 249 | Mean : 31, Range: 25-46   | 182 (73.0) | Radiology         | 2012 | Modified MBI (2 Single Item Measures, & PA (5 items)) | 62.00% | High EE or DP                                           |
| Michels et al, 2003 <sup>119</sup>    | USA         | North America           | 350 | Mean : 30.4, SD: 5.2      | 238 (68.0) | General Practice  | 1993 | MBI                                                   | NR     | NR                                                      |
| Miyoshi et al, 2016 <sup>120</sup>    | Japan       | Asia                    | 85  | Mean : 26.24, SD: 3.81    | 47 (55)    | NR                | 2013 | MBI-GS                                                | 30.59% | High EE and 1 of high DP or low PA                      |
| Mohammed et al, 2014 <sup>121</sup>   | Egypt       | ME & NA                 | 84  | NR                        | 46 (55)    | Multiple          | 2012 | MBI                                                   | 76.00% | 2/3 of high EE, high DP or low PA                       |
| Moloney et al, 2000 <sup>122</sup>    | New Zealand | Australia & New Zealand | 99  | NR                        | 52 (52)    | Psychiatry        | 1997 | MBI                                                   | NR     | NR                                                      |
| Mordant et al, 2014 <sup>123</sup>    | Europe      | Europe                  | 155 | Mean : 34.6, SD: 8.2      | 103 (66.5) | Multiple          | 2010 | Modified MBI (2- Single Item Measures of EE and DP)   | 24.80% | "Once a week or less" response to at least one question |
| Msaouel et al, 2010 <sup>124</sup>    | Greece      | Europe                  | 311 | Median: 32, Range: 26-45  | 172 (55.3) | Multiple          | NR   | MBI                                                   | 49.50% | High EE and 1 of high DP or low PA)                     |
| Myszkowski et al, 2017 <sup>125</sup> | France      | Europe                  | 259 | Mean : 25.6, SD/Range: NR | 60 (23.2)  | Internal Medicine | NR   | MBI                                                   | NR     | NR                                                      |
| Nolan et al, 2017 <sup>126</sup>      | Canada      | North America           | 166 | Median: 27.5,             | 43 (26.0)  | Pediatrics        | 2014 | MBI                                                   | 42.00% | High EE or DP                                           |

|                                         |           |                         |     |                        |            |                   |      |                                                       |        |                           |
|-----------------------------------------|-----------|-------------------------|-----|------------------------|------------|-------------------|------|-------------------------------------------------------|--------|---------------------------|
|                                         |           |                         |     | IQR:<br>4.0            |            |                   |      |                                                       |        |                           |
| O'Connor et al, 2017 <sup>127</sup>     | Ireland   | Europe                  | 172 | NR                     | 75 (43.6)  | Multiple          | 2015 | MBI                                                   | 69.50% | High EE or DP             |
| Ogundipe et al, 2014 <sup>128</sup>     | Nigeria   | Africa                  | 204 | Mean : 33.44, SD: 4.5  | 119 (58.3) | Multiple          |      | MBI                                                   | NR     | High EE and DP and low PA |
| Okpozo et al, 2017 <sup>129</sup>       | USA       | North America           | 203 | NR                     | 105 (51.7) | Multiple          | NR   | MBI                                                   | NR     | NR                        |
| Olson et al, 2014 <sup>130</sup>        | USA       | North America           | 76  | Mean : 29.2, SD: 2.9   | 40 (53)    | Internal Medicine | 2012 | MBI                                                   | 53.90% | High EE or DP             |
| Olson et al, 2015 <sup>131</sup>        | USA       | North America           | 45  | Mean : 28.4, SD: 1.7   | 16 (36)    | Pediatrics        | 2014 | MBI                                                   | 40.00% | High EE or DP or low PA   |
| Panagopoulou et al, 2006 <sup>132</sup> | Greece    | Europe                  | 141 | Mean : 32, SD: 5       | 78 (55.0)  | Internal medicine | 2004 | MBI                                                   | NR     | High EE and DP            |
| Pantaleoni et al, 2014 <sup>133</sup>   | USA       | North America           | 61  | NR                     | NR         | Pediatrics        | 2011 | MBI                                                   | 46.00% | High EE or DP             |
| Park et al, 2016 <sup>134</sup>         | Korea     | Asia                    | 317 | Mean : 30.44, SD: 2.98 | 214 (67.5) | Multiple          | 2013 | MBI                                                   | NR     | NR                        |
| Parr et al, 2016 <sup>135</sup>         | Australia | Australia & New Zealand | 153 | NR                     | 68 (44.4)  | Multiple          | NR   | Copenhagen Burnout Inventory                          | NR     | >= 50                     |
| Pereira-Lima et al, 2015 <sup>136</sup> | Brazil    | South America           | 305 | Mean : 28, SD: 2.53    | 159 (52.1) | Multiple          | NR   | Burnout Syndrome Inventory                            | 58.36% | EE+ED or DH               |
| Porrino et al, 2017 <sup>137</sup>      | USA       | North America           | 58  | NR                     | 48 (83)    | Radiology         | 2016 | Modified MBI (2 Single Item Measures, & PA (5 items)) | 87.90% | High EE or DP or low PA   |

|                                       |                        |               |      |                           |            |                  |      |                                              |                                           |                                                                                        |
|---------------------------------------|------------------------|---------------|------|---------------------------|------------|------------------|------|----------------------------------------------|-------------------------------------------|----------------------------------------------------------------------------------------|
| Prins et al, 2007 <sup>138</sup>      | The Netherlands        | Europe        | 158  | Mean : 31.9, SD: 3.2      | 76 (48.0)  | Multiple         | 2003 | Modified MBI (20 items)                      | 13.00%                                    | Moderate: >19.92 EE + >7.95 (women) or >8.95 (men) on DP. OR >19.92EE and >25.97 PA    |
| Prins et al, 2010 <sup>139</sup>      | The Netherlands        | Europe        | 2115 | Mean : 31.5, SD: 3.5      | 820 (38.8) | Multiple         | 2005 | Modified MBI (20 items)                      | 21.00%                                    | Moderate: >=19.92 EE + >7.95 (women) or >8.95 (men) on DP. OR >=19.92EE and <=25.97 PA |
| Purdy et al, 1987 <sup>140</sup>      | USA                    | North America | 67   | Mean : 29.1, SD: 3.8      | 53 (79)    | General Practice | 1984 | MBI                                          | NR                                        | NR                                                                                     |
| Racic et al, 2018 <sup>141</sup>      | Bosnia and Herzegovina | Europe        | 26   | NR                        | NR         | General Practice | 2014 | Professional Quality of Life Index Version 5 | NR                                        | low <=22, moderate 23-41, high >=42                                                    |
| Ramey et al, 2017 <sup>142</sup>      | USA                    | North America | 205  | NR                        | 141 (68.8) | Oncology         | 2016 | MBI                                          | 33.20%                                    | High EE or DP                                                                          |
| Ratnakaran et al, 2016 <sup>143</sup> | India                  | Asia          | 558  | NR                        | 326 (58.4) | Multiple         | NR   | Copenhagen Burnout Inventory                 | NR; burnout in 3 diff categories reported | 50/100 score cutoff for high/low                                                       |
| Raviola et al, 2002 <sup>144</sup>    | Kenya                  | Africa        | 50   | Mean : 33, SD/R range: NR | NR         | Multiple         | NS   | Single item measure                          | 82.00%                                    | Self-report                                                                            |
| Ringrose et al, 2009 <sup>145</sup>   | Netherlands            | Europe        | 47   | Mean : 30.3, SD: 3.3      | 23 (49)    | Multiple         | 2007 | Modified MBI (15 items)                      | 31.00%                                    | High EE and 1 of high DP or low PA)                                                    |

|                                        |             |                         |     |                              |            |                   |      |                              |        |                                                                         |
|----------------------------------------|-------------|-------------------------|-----|------------------------------|------------|-------------------|------|------------------------------|--------|-------------------------------------------------------------------------|
| Ripp et al, 2010 <sup>146</sup>        | USA         | North America           | 145 | NR                           | 73 (50.3)  | Internal Medicine | 2007 | MBI                          | 34.00% | High EE or DP                                                           |
| Ripp et al, 2011 <sup>147</sup>        | USA         | North America           | 191 | Mean : 28, SD/R range: NR    | 126 (66.0) | Internal Medicine | 2009 | MBI                          | 81.00% | High EE or DP                                                           |
| Ripp et al, 2015 <sup>148</sup>        | USA         | North America           | 133 | NR                           | 77 (58.0)  | Internal Medicine | 2012 | MBI                          | 75.00% | High EE or DP                                                           |
| Robertson et al, 2017 <sup>149</sup>   | USA         | North America           | 340 | NR                           | 143 (42.0) | Multiple          | 2015 | Single item measure          | 34.00% | burnout was considered positive if respondent selected choice 3,4, or 5 |
| Rogers et al, 2014 <sup>150</sup>      | Australia   | Australia & New Zealand | 349 | Mean : 28, SD: 4.4           | 108 (31.0) | NR                | 2011 | Copenhagen Burnout Inventory | NR     | NR                                                                      |
| Rogers et al, 2016 <sup>151</sup>      | Canada      | North America           | 198 | NR                           | 55 (27.8)  | Multiple          | 2014 | Copenhagen Burnout Inventory | NR     | NR                                                                      |
| Rosen et al, 2006 <sup>152</sup>       | USA         | North America           | 47  | NR                           | 23 (49)    | Internal Medicine | 2003 | MBI                          | 55.30% | High EE and DP                                                          |
| Rui et al, 2016 <sup>153</sup>         | China       | Asia                    | 149 | NR                           | NR         | Anesthesia        | NS   | MBI                          | NR     | High EE, high DP and low PA                                             |
| Ruitenburng et al, 2012 <sup>154</sup> | Netherlands | Europe                  | 181 | Mean : 33, SD: 3.2           | 76 (42.0)  | Multiple          | 2009 | Modified MBI (13 items)      | 7.00%  | High EE and DP                                                          |
| Sajjadi et al, 2017 <sup>155</sup>     | Canada      | North America           | 43  | Mean : 30, SD: 3             | 19 (45)    | IM                | 2014 | MBI                          | 21.00% | High EE and DP and low PA                                               |
| Salles et al, 2014 <sup>156</sup>      | USA         | North America           | 141 | Mean : 31.25, SD/R range: NR | 89 (63.0)  | Multiple          | NR   | MBI                          | NR     | NR                                                                      |

|                                         |                     |               |      |                         |            |                                |      |                                                     |        |                                 |
|-----------------------------------------|---------------------|---------------|------|-------------------------|------------|--------------------------------|------|-----------------------------------------------------|--------|---------------------------------|
| Salpigkdis et al, 2016 <sup>157</sup>   | Greece, UK, Germany | Europe        | 131  | Mean : 30, SD: 3        | 66 (50.0)  | Multiple                       | 2016 | MBI                                                 | NR     | NR                              |
| Sargent et al, 2004 <sup>158</sup>      | USA                 | North America | 21   | Mean : 30, Range: 28-34 | 20 (97)    | Orthopedic Surgery             | NR   | MBI                                                 | NR     | NR                              |
| Sargent et al, 2009 <sup>159</sup>      | USA                 | North America | 384  | NR                      | 338 (88.0) | Orthopedic Surgery             | NR   | MBI                                                 | 56.00% | NR                              |
| Satterfield et al, 2009 <sup>160</sup>  | USA                 | North America | 28   | NR                      | 9 (32)     | Internal Medicine              |      | Tedium index                                        | NR     | NR                              |
| Schweitzer, 1994 <sup>161</sup>         | South Africa        | Africa        | 36   | NR                      | NR         | NR                             | NR   | Single item measure                                 | 55.50% | Yes                             |
| See et al, 2016 <sup>162</sup>          | Singapore           | Asia          | 64   | NR                      | NR         | Internal Medicine              | 2013 | Copenhagen Burnout Inventory                        | 71.80% | Score of 50/100 on any subscale |
| Selic et al, 2012 <sup>163</sup>        | Slovenia            | Europe        | 117  | Mean : 34.2, SD: 4.6    | 21 (17.9)  | General Practice               | 2009 | MBI                                                 | NR     | NR                              |
| Shakir et al, 2017 <sup>164</sup>       | USA                 | North America | 255  | NR                      | 205 (80.4) | Neurosurgery                   | 2016 | Modified MBI (9 items)                              | 36.50% | High EE or DP                   |
| Shams and El-Masry, 2013 <sup>165</sup> | Egypt               | ME & NA       | 30   | NR                      | NR         | Anesthesia                     | 2011 | MBI                                                 | NR     | High EE, DP and low PA          |
| Shanafelt et al, 2002 <sup>166</sup>    | USA                 | North America | 115  | NR                      | 54 (47.0)  | Internal Medicine              | 2001 | MBI                                                 | 76.00% | High EE or DP                   |
| Shanafelt et al, 2014 <sup>167</sup>    | USA                 | North America | 1345 | Median: 33, IQR: NR     | 710 (52.8) | Oncology                       | 2014 | Modified MBI (2- Single Item Measures of EE and DP) | 34.10% | High EE or DP                   |
| Shapiro et al, 2017 <sup>168</sup>      | USA                 | North America | 217  | NR                      | 178 (82.0) | Oral and Maxillofacial Surgery | NS   | MBI                                                 | NR     | NR                              |



|                                             |               |               |     |                               |            |                   |      |                                                     |        |                                   |
|---------------------------------------------|---------------|---------------|-----|-------------------------------|------------|-------------------|------|-----------------------------------------------------|--------|-----------------------------------|
| Shoimer et al, 2018 <sup>169</sup>          | Canada        | North America | 96  | NR                            | NR         | Dermatology       | 2014 | MBI                                                 | NR     | NR                                |
| Simpkin et al, 2018 <sup>170</sup>          | US and Canada | North America | 49  | NR                            | 15 (30)    | Pediatrics        | 2015 | Modified MBI (2- Single Item Measures of EE and DP) | 31.00% | High EE or DP                     |
| Siu et al, 2012 <sup>171</sup>              | Hong Kong     | Asia          | 77  | NR                            | NR         | NR                | 2009 | MBI                                                 | 48.00% | High EE and DP and low PA         |
| Sochos et al, 2012 <sup>172</sup>           | England       | Europe        | 184 | Mean : 30.6, SD: 4.4          | 73 (40.0)  | Multiple          | NS   | MBI                                                 | NR     | NR                                |
| Spataro et al, 2016 <sup>173</sup>          | USA           | North America | 198 | Mean : 29.9, Range: 25.9-41.5 | 101 (51.0) | Internal Medicine | 2014 | MBI                                                 | 22.00% | High EE or DP                     |
| Stodel et al, 2011 <sup>174</sup>           | South Africa  | Africa        | 22  | Mean : 30, SD: 3.26           | 6 (25)     | NR                | 2009 | MBI                                                 | NR     | NR                                |
| Sulaiman et al, 2017 <sup>175</sup>         | Ireland       | Europe        | 265 | Mean : 28.5, SD: 0.26         | 140 (52.8) | Multiple          | NS   | MBI                                                 | 26.40% | 2/3 of high EE, high DP or low PA |
| Swami et al, 2013 <sup>176</sup>            | India         | Asia          | 56  | Mean : 27.8, SD: 2.37         | NR         | Multiple          | NR   | Shirom-Milam Burnout Measure                        | NR     | NR                                |
| Talih et al, 2016 <sup>177</sup>            | Lebanon       | ME & NA       | 118 | NR                            | 62 (53.0)  | Multiple          | 2013 | Burnout Measure (modified)                          | 27.00% | >=3.5                             |
| Toral-Villanueva et al, 2009 <sup>178</sup> | Mexico        | North America | 312 | Mean : 28, SD: 2.5            | 178 (57.0) | Multiple          | 2003 | MBI                                                 | 40.00% | High EE or DP                     |

|                                          |             |               |      |                          |            |                    |      |                                                     |        |                                                                                                           |
|------------------------------------------|-------------|---------------|------|--------------------------|------------|--------------------|------|-----------------------------------------------------|--------|-----------------------------------------------------------------------------------------------------------|
| Torppa et al, 2015 <sup>179</sup>        | Finland     | Europe        | 97   | NR                       | NR         | General Practice   | 2011 | Modified MBI (1 item)                               | 16.50% | High EE                                                                                                   |
| Trockel et al, 2018 <sup>180</sup>       | USA         | North America | 185  | NR                       | NR         | Multiple           | NS   | Modified MBI (2- Single Item Measures of EE and DP) | 50.00% | NR                                                                                                        |
| Turgut et al, 2016 <sup>181</sup>        | Turkey      | Asia          | 127  | Mean : 28.01, 2.41       | 56 (44.1)  | NR                 | NS   | MBI                                                 | NR     | NR                                                                                                        |
| Tzischinsky et al, 2001 <sup>182</sup>   | Israel      | ME & NA       | 78   | M/F 30.7/30.3            | 53 (68)    | NR                 | NR   | MBI                                                 | NR     | NR                                                                                                        |
| van der Wal et al, 2016 <sup>183</sup>   | Netherlands | Europe        | 141  | Mean : 31, Range: 26-48  | 53 (37.6)  | Anesthesia         | 2012 | Modified MBI (20 items)                             | 11.30% | High EE and 1 of high DP or low PA                                                                        |
| van Vendeloot et al, 2014 <sup>184</sup> | Netherlands | Europe        | 105  | NR                       | 83 (79.0)  | Orthopedic Surgery | 2011 | Modified MBI (2- Single Item Measures of EE and DP) | 27.60% | High EE or DP                                                                                             |
| van Vendeloot et al, 2018 <sup>185</sup> | Belgium     | Europe        | 236  | Median: 28, Range: 26-40 | 96 (40.7)  | Multiple           | 2016 | Modified MBI (20 items)                             | 41.50% | Mean EE $\geq 2.5$ AND DP $\geq 1.8$ (men) or $\geq 1.6$ (women) OR ...EE $\geq 2.5$ and $\leq 3.7$ on PA |
| van Vendeloot et al, 2018 <sup>186</sup> | Netherlands | Europe        | 1231 | Median: 32, Range: 26-40 | 325 (26.4) | Multiple           | 2015 | Modified MBI (20 items)                             | 15.00% | Mean EE $\geq 2.5$ AND DP $\geq 1.8$ (men) or $\geq 1.6$ (women) OR ...EE $\geq 2.5$ and                  |

|                                          |           |                         |     |                        |            |                           |              |     |        |                                    |
|------------------------------------------|-----------|-------------------------|-----|------------------------|------------|---------------------------|--------------|-----|--------|------------------------------------|
|                                          |           |                         |     |                        |            |                           |              |     |        | <=3.7 on PA                        |
| Waheed et al, 2017 <sup>187</sup>        | Pakistan  | Asia                    | 102 | Mean : 27.45, SD: 1.69 | NR         | Obstetrics and Gynecology | 2016         | MBI | NR     | High EE or DP                      |
| Waldman et al, 2009 <sup>188</sup>       | Argentina | Europe                  | 106 | Mean : 29.1, SD: 2.4   | 73 (68.7)  | Cardiology                | 2007         | MBI | 80.20% | High EE or DP                      |
| Weigl et al, 2015 <sup>189</sup>         | Germany   | Europe                  | 39  | NR                     | NR         | Pediatrics                | NS           | MBI | NR     | NR                                 |
| West et al, 2009 <sup>190</sup>          | USA       | North America           | 239 | NR                     | 148 (62.1) | Internal Medicine         | 2003 to 2009 | MBI | NR     | NR                                 |
| Willcock et al, 2004 <sup>191</sup>      | Australia | Australia & New Zealand | 110 | Mean : 28.3, SD: 3.8   | 62 (56.0)  | Psychiatry                | 2001         | MBI | 54.00% | High EE or DP                      |
| Williford et al, 2018 <sup>192</sup>     | USA       | North America           | 76  | NR                     | NR         | General Surgery           | 2017         | MBI | 75.00% | High EE or DP                      |
| Woodside Jr et al, 2008 <sup>193</sup>   | USA       | North America           | 155 | Mean : 35, SD: 7.5     | 88 (57.0)  | Multiple                  | 2002 to 2005 | MBI | NR     | NR                                 |
| Yron-di et al, 2017 <sup>194</sup>       | France    | Europe                  | 271 | Mean : 28.2            | 104 (38.4) | Multiple                  | NS           | MBI | NR     | NR                                 |
| Zis et al, 2014 <sup>195</sup>           | Greece    | Europe                  | 263 | Mean : 33.5, SD: 3.3   | 141 (53.6) | Multiple                  | 2012         | MBI | 14.40% | High EE and 1 of high DP or low PA |
| Zis et al, 2015 <sup>196</sup>           | Greece    | Europe                  | 116 | Mean : 34.5, SD: 3.6   | 52 (44.8)  | Neurology                 | 2014         | MBI | 18.10% | High EE and 1 of high DP or low PA |
| Zubairi and Noordin, 2016 <sup>197</sup> | Pakistan  | Asia                    | 82  | NR                     | 44 (54)    | Multiple                  | 2013         | MBI | NR     | NR                                 |

1  
2  
3  
4  
5  
6  
7  
8  
9  
10  
11  
12  
13  
14  
15  
16  
17  
18  
19  
20  
21  
22  
23  
24  
25  
26  
27  
28  
29  
30  
31  
32  
33  
34  
35  
36  
37  
38  
39  
40  
41  
42  
43  
44  
45  
46  
47  
48  
49  
50  
51  
52  
53  
54  
55  
56  
57  
58  
59  
60

Confidential

Appendix Figure 1: The Preferred Reporting Items for Systematic Reviews and Meta-Analyses (PRISMA) Flow Diagram

1  
2  
3  
4  
5  
6  
7  
8  
9  
10  
11  
12  
13  
14  
15  
16  
17  
18  
19  
20  
21  
22  
23  
24  
25  
26  
27  
28  
29  
30  
31  
32  
33  
34  
35  
36  
37  
38  
39  
40  
41  
42  
43  
44  
45  
46  
47  
48  
49  
50  
51  
52  
53  
54  
55  
56  
57  
58  
59  
60

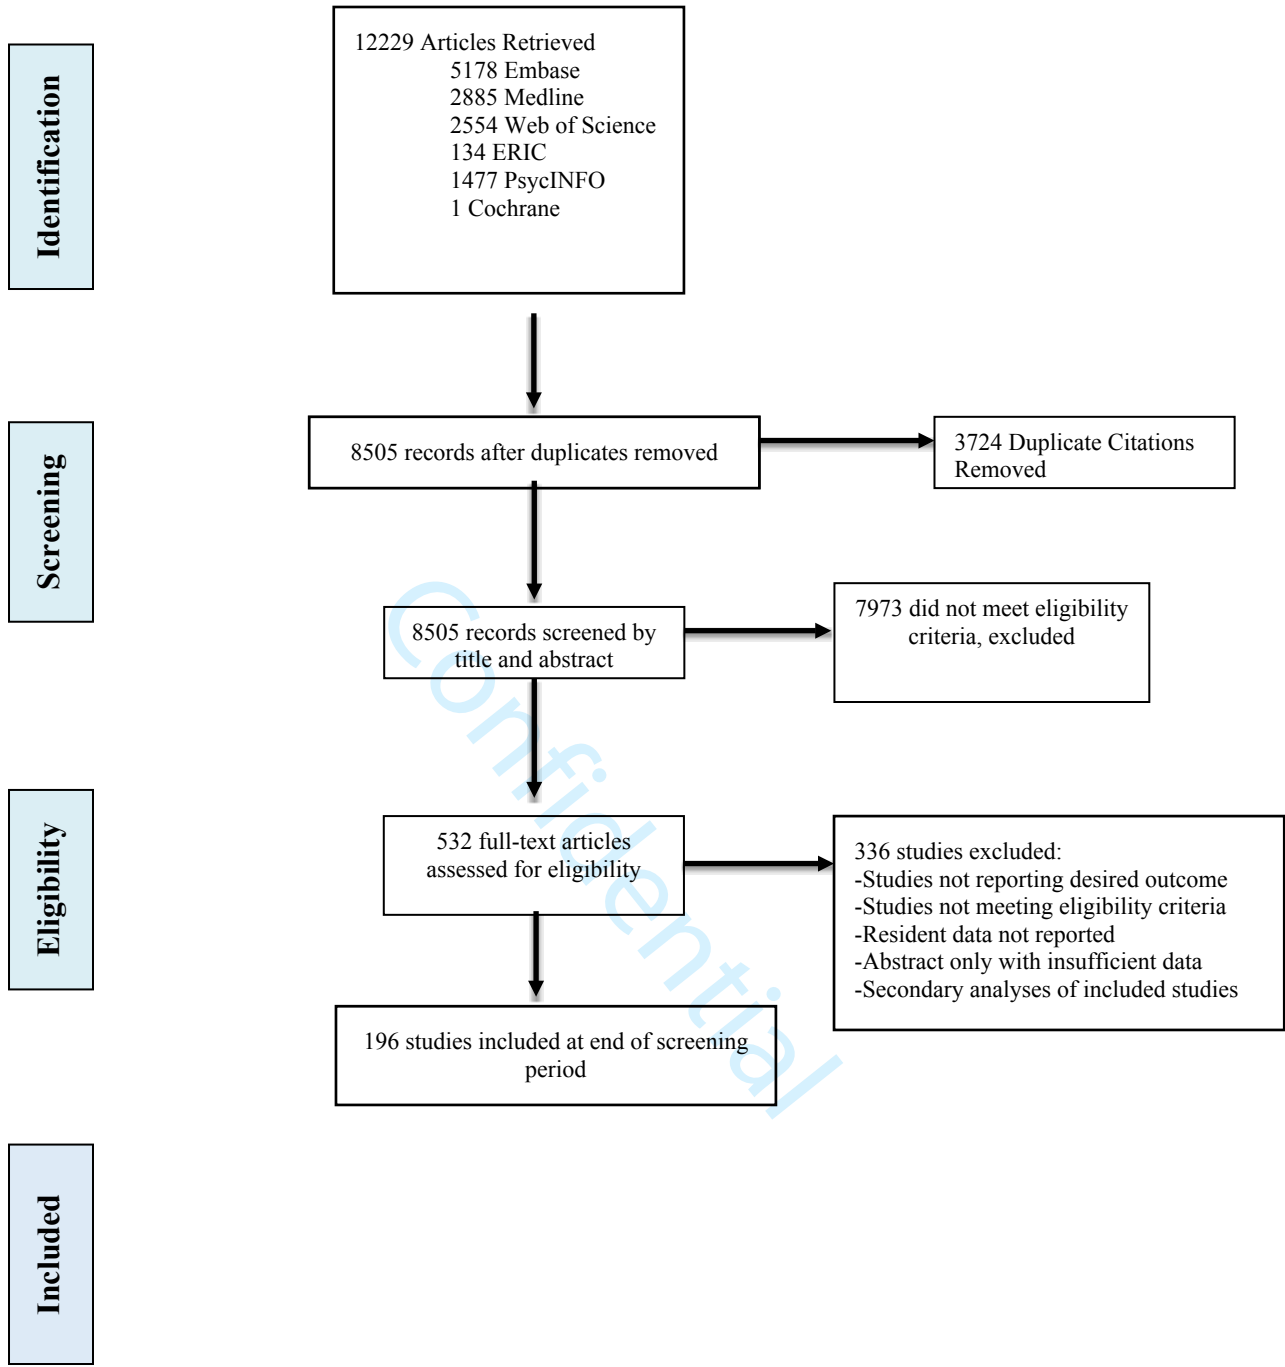

1  
2  
3  
4  
5  
6  
7  
8  
9  
10  
11  
12  
13  
14  
15  
16  
17  
18  
19  
20  
21  
22  
23  
24  
25  
26  
27  
28  
29  
30  
31  
32  
33  
34  
35  
36  
37  
38  
39  
40  
41  
42  
43  
44  
45  
46  
47  
48  
49  
50  
51  
52  
53  
54  
55  
56  
57  
58  
59  
60

Confidential

## References

1. Abdulrahman M, Farooq MM, Al Kharmiri A, Al Marzooqi F, Carrick FR. Burnout and depression among medical residents in the United Arab Emirates: A Multicenter study. *J Fam Med Prim care*. 2018;7(2 PG-435-441):435-441. doi:[https://dx.doi.org/10.4103/jfmpc.jfmpc\\_199\\_17](https://dx.doi.org/10.4103/jfmpc.jfmpc_199_17)
2. Afzal KI, Khan FM, Mulla Z, Akins R, Ledger E, Giordano FL. Primary language and cultural background as factors in resident burnout in medical specialties: a study in a bilingual US city. *South Med J*. 2010;103(7 PG-607-15):607-615. doi:<https://dx.doi.org/10.1097/SMJ.0b013e3181e20cad>
3. Agha A, Mordya A, Anwar E, Saleh N, Rashid I, Saeed M. Burnout among middle-grade doctors of tertiary care hospital in Saudi Arabia. *Work J Prev Assess Rehabil*. 2015;51(4 PG-839-847):839-847. doi:10.3233/wor-141898
4. Akdeniz M, Yaman H, Senol Y, et al. Family practice in Turkey: views of family practice residents. *Postgrad Med*. 2011;123(3 PG-144-9):144-149. doi:<https://dx.doi.org/10.3810/pgm.2011.05.2292>
5. Aksoy DY, Durusu Tanriover M, Dizdar O, et al. Burnout syndrome during residency in internal medicine and pediatrics in a country without working time directive. *Int J Health Care Qual Assur*. 2014;27(3 PG-223-230):223-230. doi:<http://dx.doi.org/10.1108/IJHCQA-12-2012-0127>
6. Al Atassi H, Shapiro MC, Rao S, Dean J, Salama A. Oral and Maxillofacial Surgery Resident Perception of Personal Achievement and Anxiety: A Cross-Sectional Analysis. *J Oral Maxillofac Surg*. 2018;(PG-). doi:<https://dx.doi.org/10.1016/j.joms.2018.06.018>
7. Al-Dubai SAR, Ganasegeran K, Perianayagam W, Rampal KG. Emotional burnout, perceived sources of job stress, professional fulfillment, and engagement among medical residents in Malaysia. *Sci World J*. 2013;2013(PG-137620):137620. doi:<http://dx.doi.org/10.1155/2013/137620>
8. Al-Ma'mari NO, Naimi AI, Tulandi T. Prevalence and predictors of burnout among obstetrics and gynecology residents in Canada. *Gynecol Surg*. 2016;13(4 PG-323-327):323-327. doi:<http://dx.doi.org/10.1007/s10397-016-0955-3>
9. Aldrees TM, Aleissa S, Zamakhshary M, Badri M, Sadat-Ali M. Physician well-being: Prevalence of burnout and associated risk factors in a tertiary hospital, Riyadh, Saudi Arabia. *Ann Saudi Med*. 2013;33(5 PG-451-456):451-456. doi:<http://dx.doi.org/10.5144/0256-4947.2013.451>
10. Aldrees T, Badri M, Islam T, Alqahtani K. Burnout among otolaryngology residents in Saudi Arabia: A multicenter study. *J Surg Educ*. 2015;72(5 PG-844-848):844-848. doi:<http://dx.doi.org/10.1016/j.jsurg.2015.02.006>
11. Aldrees T, Hassouneh B, Alabdulkarim A, et al. Burnout among plastic surgery residents: National survey in Saudi Arabia. *Saudi Med J*. 2017;38(8 PG-832-836):832-836. doi:<http://dx.doi.org/10.15537/smj.2017.8.18346>
12. Anil M, Yurtseven A, Yurtseven I, et al. The evaluation of burnout and job satisfaction levels in residents of pediatrics. *Turk Pediatr Ars*. 2017;52(2 PG-66-71):66-71. doi:<http://dx.doi.org/10.5152/TurkPediatriArs.2017.4982>
13. Antiel RM, Reed DA, Van Arendonk KJ, et al. Effects of Duty Hour Restrictions on Core Competencies, Education, Quality of Life, and Burnout Among General Surgery Interns. *JAMA Surg*. 2013;148(5):448. doi:10.1001/jamasurg.2013.1368
14. Arora M, Diwan AD, Harris IA. Prevalence and factors of burnout among Australian orthopaedic trainees: a cross-sectional study. *J Orthop Surg (Hong Kong)*. 2014;22(3 PG-374-7):374-377. <http://ovidsp.ovid.com/ovidweb.cgi?T=JS&PAGE=reference&D=med8&NEWS=N&AN=25550022 NS> .
15. Ashkar K, Romani M, Musharrafieh U, Chaaya M. Prevalence of burnout syndrome among medical residents: experience of a developing country. *Postgrad Med J*. 2010;86(1015 PG-266-71):266-271. doi:<https://dx.doi.org/10.1136/pgmj.2009.092106>
16. Attenello FJ, Buchanan IA, Wen T, et al. Factors associated with burnout among US neurosurgery residents: a nationwide survey. *J Neurosurg*. 2018;(PG-1-15):1-15. doi:<https://dx.doi.org/10.3171/2017.9.JNS17996>
17. Baer TE, Feraco AM, Tuysuzoglu Sagalowsky S, Williams D, Litman HJ, Vinci RJ. Pediatric Resident Burnout and Attitudes Toward Patients. *Pediatrics*. 2017;139(3 PG-). doi:<https://dx.doi.org/10.1542/peds.2016-2163>
18. Barrack RL, Miller LS, Sotile WM, Sotile MO, Rubash HE. Effect of duty hour standards on burnout among orthopaedic surgery residents. *Clin Orthop Relat Res*. 2006;449:134-137. doi:10.1097/01.blo.0000224030.78108.58
19. Becker JL, Milad MP, Klock SC. Burnout, depression, and career satisfaction: Cross-sectional study of obstetrics and gynecology residents. *Am J Obstet Gynecol*. 2006;195(5 PG-1444-1449):1444-1449.

- doi:<http://dx.doi.org/10.1016/j.ajog.2006.06.075>
20. Beckman TJ, Reed DA, Shanafelt TD, West CP. Impact of Resident Well-Being and Empathy on Assessments of Faculty Physicians. *J Gen Intern Med.* 2010;25(1):52-56. doi:10.1007/s11606-009-1152-0
  21. Beckman T, Reed D, Shanafelt T, West C. Associations between resident physician well-being and assessments of knowledge and clinical performance. *J Gen Intern Med.* 2011;26(SUPPL. 1 PG-S230):S230. doi:<http://dx.doi.org/10.1007/s11606-011-1730-9>
  22. Belayachi J, Rkain I, Rkain H, et al. Burnout Syndrome in Moroccan Training Resident: Impact on Quality of Life. *Iran J Public Health.* 2016;45(2 PG-260-2):260-262. <http://ovidsp.ovid.com/ovidweb.cgi?T=JS&PAGE=reference&D=prem&NEWS=N&AN=27114993> NS -.
  23. Bellolio MF, Cabrera D, Sadosty AT, et al. Compassion fatigue is similar in emergency medicine residents compared to other medical and surgical specialties. *West J Emerg Med.* 2014;15(6 PG-629-635):629-635. doi:<http://dx.doi.org/10.5811/westjem.2014.5.21624>
  24. Biaggi P, Peter S, Ulich E. Stressors, emotional exhaustion and aversion to patients in residents and chief residents - what can be done? *Swiss Med Wkly.* 2003;133(23-24):339-346. doi:2003/23/smw-10134
  25. Billings ME, Lazarus ME, Wenrich M, Curtis JR, Engelberg RA. The effect of the hidden curriculum on resident burnout and cynicism. *J Grad Med Educ.* 2011;3(4 PG-503-10):503-510. doi:<https://dx.doi.org/10.4300/JGME-D-11-00044.1>
  26. Blanchard P, Truchot D, Albiges-Sauvin L, et al. Prevalence and causes of burnout amongst oncology residents: A comprehensive nationwide cross-sectional study. *Eur J Cancer.* 2010;46(15):2708-2715. doi:10.1016/j.ejca.2010.05.014
  27. Block L, Wu AW, Feldman L, Yeh H-C, Desai S V. Residency schedule, burnout and patient care among first-year residents. *Postgrad Med J.* 2013;89(1055 PG-495-500):495-500. doi:<https://dx.doi.org/10.1136/postgradmedj-2012-131743>
  28. Bogg J, Gibbs T, Bundred P. Training, job demands and mental health of pre-registration house officers. *Med Educ.* 2001;35(6 PG-590-5):590-595. <http://ovidsp.ovid.com/ovidweb.cgi?T=JS&PAGE=reference&D=med4&NEWS=N&AN=11380863> NS -.
  29. Bragard I, Etienne A-M, Libert Y, et al. Predictors and correlates of burnout in residents working with cancer patients. *J Cancer Educ.* 2010;25(1 PG-120-6):120-126. doi:<https://dx.doi.org/10.1007/s13187-010-0050-9>
  30. Bragard I, Dupuis G, Razavi D, Reynaert C, Etienne AM. Quality of work life in doctors working with cancer patients. *Occup Med (Chic Ill).* 2012;62(1 PG-34-40):34-40. doi:<http://dx.doi.org/10.1093/occmed/kqr149>
  31. Brant H, Wetherell MA, Lightman S, Crown A, Vedhara K. An exploration into physiological and self-report measures of stress in pre-registration doctors at the beginning and end of a clinical rotation. *Stress.* 2010;13(2 PG-155-62):155-162. doi:<https://dx.doi.org/10.3109/10253890903093778>
  32. Braun SE, Auerbach SM, Rybarczyk B, Lee B, Call S. Mindfulness, burnout, and effects on performance evaluations in internal medicine residents. *Adv Med Educ Pract.* 2017;8(PG-591-597):591-597. doi:<https://dx.doi.org/10.2147/AMEP.S140554>
  33. Campbell J, Prochazka A V, Yamashita T, Gopal R. Predictors of persistent burnout in internal medicine residents: a prospective cohort study. *Acad Med.* 2010;85(10 PG-1630-4):1630-1634. doi:<https://dx.doi.org/10.1097/ACM.0b013e3181f0c4e7>
  34. Castelo-Branco C, Figueras F, Eixarch E, et al. Stress symptoms and burnout in obstetric and gynaecology residents. *BJOG An Int J Obstet Gynaecol.* 2007;114(1 PG-94-98):94-98. doi:<http://dx.doi.org/10.1111/j.1471-0528.2006.01155.x>
  35. Chaput B, Bertheuil N, Jacques J, et al. Professional Burnout Among Plastic Surgery Residents: Can it be Prevented? Outcomes of a National Survey. *Ann Plast Surg.* 2015;75(1 PG-2-8):2-8. doi:<https://dx.doi.org/10.1097/SAP.0000000000000530>
  36. Chati R, Huet E, Grimberg L, Schwarz L, Tuech J-J, Bridoux V. Factors associated With burnout among French digestive surgeons in training: results of a national survey on 328 residents and fellows. *Am J Surg.* 2017;213(4 PG-754-762):754-762. doi:<https://dx.doi.org/10.1016/j.amjsurg.2016.08.003>
  37. Chaukos D, Chad-Friedman E, Mehta DH, et al. Risk and Resilience Factors Associated with Resident Burnout. *Acad Psychiatry.* 2017;41(2 PG-189-194):189-194. doi:<http://dx.doi.org/10.1007/s40596-016-0628-6>
  38. Chen K-Y, Yang C-M, Lien C-H, et al. Burnout, job satisfaction, and medical malpractice among physicians. *Int J Med Sci.* 2013;10(11 PG-1471-8):1471-1478. doi:<https://dx.doi.org/10.7150/ijms.6743>
  39. Choi D, Cedfeldt A, Flores C, Irish K, Brunett P, Girard D. Resident wellness: institutional trends over 10



- years since 2003. *Adv Med Educ Pract.* 2017;8(PG-513-523):513-523.  
doi:<https://dx.doi.org/10.2147/AMEP.S138770>
40. Cofer KD, Hollis RH, Goss L, Morris MS, Porterfield JR, Chu DI. Burnout is Associated With Emotional Intelligence but not Traditional Job Performance Measurements in Surgical Residents. *J Surg Educ.* 2018;(PG-). doi:<http://dx.doi.org/10.1016/j.jsurg.2018.01.021>
  41. Coluccia A, Fereti F, Bolognesi S, et al. Association between burnout and emotional and sexual life among medical students of postgraduate schools in psychiatry. *Minerva Psichiatr.* 2017;58(4 PG-187-195):187-195. doi:10.23736/s0391-1772.17.01946-x
  42. Cooke GP, Doust JA, Steele MC. A survey of resilience, burnout, and tolerance of uncertainty in Australian general practice registrars. *BMC Med Educ.* 2013;13(PG-2):2. doi:<http://dx.doi.org/10.1186/1472-6920-13-2>
  43. Creed PA, Rogers ME, Praskova A, Searle J. Career calling as a personal resource moderator between environmental demands and burnout in Australian junior doctors. *J Career Dev.* 2014;41(6 PG-547-561):547-561. doi:<http://dx.doi.org/10.1177/0894845313520493>
  44. Cubero DIG, Fumis RRL, de Sa TH, et al. "Burnout in Medical Oncology Fellows: a Prospective Multicenter Cohort Study in Brazilian Institutions." *J Cancer Educ.* 2016;31(3 PG-582-7):582-587. doi:<https://dx.doi.org/10.1007/s13187-015-0850-z>
  45. Dahlin M, Fjell J, Runeson B. Factors at medical school and work related to exhaustion among physicians in their first postgraduate year. *Nord J Psychiatry.* 2010;64(6 PG-402-8):402-408. doi:<https://dx.doi.org/10.3109/08039481003759219>
  46. De Andrade APM, Amaro E, Farhat SCL, Schwartsman C. Higher burnout scores in paediatric residents are associated with increased brain activity during attentional functional magnetic resonance imaging task. *Acta Paediatr Int J Paediatr.* 2016;105(6 PG-705-713):705-713. doi:<http://dx.doi.org/10.1111/apa.13371>
  47. De Oliveira Jr GS, Chang R, Fitzgerald PC, et al. The prevalence of burnout and depression and their association with adherence to safety and practice standards: A survey of united states anesthesiology trainees. *Anesth Analg.* 2013;117(1 PG-182-193):182-193. doi:<http://dx.doi.org/10.1213/ANE.0b013e3182917da9>
  48. Demirci S, Yildirim YK, Ozsaran Z, Uslu R, Yalman D, Aras AB. Evaluation of burnout syndrome in oncology employees. *Med Oncol.* 2010;27(3 PG-968-974):968-974. doi:10.1007/s12032-009-9318-5
  49. Dikmetas E, Top M, Ergin G. An examination of mobbing and burnout of residents. *Turk Psikiyatri Derg.* 2011;22(3 PG-137-49):137-149. <http://ovidsp.ovid.com/ovidweb.cgi?T=JS&PAGE=reference&D=med7&NEWS=N&AN=21870303> NS .
  50. Dominguez LC, Stassen L, de Grave W, Sanabria A, Alfonso E, Dolmans D. Taking control: Is job crafting related to the intention to leave surgical training? *PLoS One.* 2018;13(6 PG-e0197276):e0197276. doi:<https://dx.doi.org/10.1371/journal.pone.0197276>
  51. Doolittle BR, Windish DM, Seelig CB. Burnout, coping, and spirituality among internal medicine resident physicians. *J Grad Med Educ.* 2013;5(2 PG-257-61):257-261. doi:<https://dx.doi.org/10.4300/JGME-D-12-00136.1>
  52. Durning SJ, Costanzo M, Artino AR, et al. Functional neuroimaging correlates of burnout among internal medicine residents and faculty members. *Front Psychiatry.* 2013;4(OCT PG-131):131. doi:<http://dx.doi.org/10.3389/fpsy.2013.00131>
  53. Dyrbye LN, West CP, Satele D, et al. Burnout among u.s. medical students, residents, and early career physicians relative to the general u.s. population. *Acad Med.* 2014;89(3 PG-443-451):443-451. doi:<http://dx.doi.org/10.1097/ACM.000000000000134>
  54. Elmore LC, Jeffe DB, Jin L, Awad MM, Turnbull IR. National Survey of Burnout among US General Surgery Residents. *J Am Coll Surg.* 2016;223(3 PG-440-451):440-451. doi:<http://dx.doi.org/10.1016/j.jamcollsurg.2016.05.014>
  55. Embriaco N, Azoulay E, Barrau K, et al. High level of burnout in intensivists: Prevalence and associated factors. *Am J Respir Crit Care Med.* 2007;175(7 PG-686-692):686-692. doi:<http://dx.doi.org/10.1164/rccm.200608-1184OC>
  56. Fahrenkopf AM, Sectish TC, Barger LK, et al. Rates of medication errors among depressed and burnt out residents: Prospective cohort study. *BMJ.* 2008;336(7642 PG-488-491):488-491. doi:<http://dx.doi.org/10.1136/bmj.39469.763218.BE>
  57. Ferreira Bortoletti F, Teresa Benevides-Pereira AM, Vasconcellos EG, et al. Triggering risk factors of the burnout syndrome in Ob/Gyn physicians from a reference public university of Brazil. *ISRN Obstet Gynecol.* 2012;(PG-593876):593876. doi:<http://dx.doi.org/10.5402/2012/593876>
  58. Fulop E, Devecsery A, Hausz K, Kovacs Z, Csabai M. Relationship between empathy and burnout among

- 1  
2  
3 psychiatric residents. *New Med.* 2011;2011-Janua(4 PG-143-147):143-147. [http://www.newmedicine.pl/  
http://ovidsp.ovid.com/ovidweb.cgi?T=JS&PAGE=reference&D=emed13&NEWS=N&AN=606207483](http://www.newmedicine.pl/http://ovidsp.ovid.com/ovidweb.cgi?T=JS&PAGE=reference&D=emed13&NEWS=N&AN=606207483) NS  
4  
5  
6 59. Galam E, Komly V, Le Tourneur A, Jund J. Burnout among French GPs in training: A cross-sectional study. *Br J Gen Pract.* 2013;63(608 PG-217-224):e217-e224. doi:<http://dx.doi.org/10.3399/bjgp13X664270>  
7  
8 60. Garza JA, Schneider KM, Promecene P, Monga M. Burnout in residency: Statewide study. *South Med J.* 2004;97(12 PG-1171-1173):1171-1173. doi:<http://dx.doi.org/10.1097/01.SMJ.0000129926.66568.10>  
9  
10 61. Geelan-Hansen K, Anne S, Benninger MS. Burnout in Otolaryngology-Head and Neck Surgery: A Single  
11 Academic Center Experience. *Otolaryngol - Head Neck Surg (United States).* 2018;(PG-).  
12 doi:<http://dx.doi.org/10.1177/0194599818774740>  
13 62. Gelfand D V, Podnos YD, Carmichael JC, et al. Effect of the 80-hour workweek on resident Burnout. *Arch*  
14 *Surg.* 2004;139(9 PG-933-940):933-940. doi:<http://dx.doi.org/10.1001/archsurg.139.9.933>  
15 63. Goitein L, Shanafelt TD, Wipf JE, Slatore CG, Back AL. The effects of work-hour limitations on resident  
16 well-being, patient care, and education in an internal medicine residency program. *Arch Intern Med.*  
17 2005;165(22 PG-2601-2606):2601-2606. doi:<http://dx.doi.org/10.1001/archinte.165.22.2601>  
18 64. Golub JS, Weiss PS, Ramesh AK, Ossoff RH, Johns 3rd MM. Burnout in residents of otolaryngology-head  
19 and neck surgery: a national inquiry into the health of residency training. *Acad Med.* 2007;82(6 PG-596-  
20 601):596-601.  
21 <http://ovidsp.ovid.com/ovidweb.cgi?T=JS&PAGE=reference&D=med5&NEWS=N&AN=17525550> NS -.  
22 65. Gopal R, Glasheen JJ, Miyoshi TJ, Prochazka A V. Burnout and internal medicine resident work-hour  
23 restrictions. *Arch Intern Med.* 2005;165(22 PG-2595-2600):2595-2600.  
24 doi:<http://dx.doi.org/10.1001/archinte.165.22.2595>  
25 66. Gopal RK, Carreira F, Baker WA, et al. Internal Medicine Residents Reject “Longer and Gentler” Training.  
26 *J Gen Intern Med.* 2007;22(1):102-106. doi:10.1007/s11606-007-0119-2  
27 67. Gouveia PA da C, Ribeiro MHCN, Aschoff CA de M, Gomes DP, Silva NAF da, Cavalcanti HAF. Factors  
28 associated with burnout syndrome in medical residents of a university hospital. *Rev Assoc Med Bras.*  
29 2017;63(6 PG-504-511):504-511. doi:<https://dx.doi.org/10.1590/1806-9282.63.06.504>  
30 68. Govardhan LM, Pinelli V, Schnatz PF. Burnout, depression and job satisfaction in obstetrics and  
31 gynecology residents. *Conn Med.* 2012;76(7 PG-389-95):389-395.  
32 <http://ovidsp.ovid.com/ovidweb.cgi?T=JS&PAGE=reference&D=med7&NEWS=N&AN=23248861> NS -.  
33 69. Goveia CS, Cruz TTMD, de Miranda DB, et al. Association between burnout syndrome and anxiety in  
34 residents and anesthesiologists of the Federal District. *Brazilian J Anesthesiol.* 2018;(PG-).  
35 doi:<http://dx.doi.org/10.1016/j.bjan.2018.02.007>  
36 70. Guenette JP, Smith SE. Burnout: Prevalence and associated factors among radiology residents in New  
37 England with comparison against United States resident physicians in other specialties. *Am J Roentgenol.*  
38 2017;209(1 PG-136-141):136-141. doi:<http://dx.doi.org/10.2214/AJR.16.17541>  
39 71. Guenette JP, Smith SE. Burnout: Job Resources and Job Demands Associated With Low Personal  
40 Accomplishment in United States Radiology Residents. *Acad Radiol.* 2018;25(6 PG-739-743):739-743.  
41 doi:<http://dx.doi.org/10.1016/j.acra.2017.12.002>  
42 72. Gulen B, Serinken M, Eken C, et al. Serum S100B as a Surrogate Biomarker in the Diagnoses of Burnout  
43 and Depression in Emergency Medicine Residents. *Acad Emerg Med.* 2016;23(7 PG-786-789):786-789.  
44 doi:<http://dx.doi.org/10.1111/acem.12973>  
45 73. Guthrie E, Tattan T, Williams E, Black D, Bacliocotti H. Sources of stress, psychological distress and  
46 burnout in psychiatrists. *Psychiatr Bull.* 1999;23(4 PG-207-212):207-212.  
47 <http://ovidsp.ovid.com/ovidweb.cgi?T=JS&PAGE=reference&D=emed6&NEWS=N&AN=29160925> NS -.  
48 74. Halliday L, Walker A, Vig S, Hines J, Brecknell J. Grit and burnout in UK doctors: a cross-sectional study  
49 across specialties and stages of training. *Postgrad Med J.* 2017;93(1101 PG-389-394):389-394.  
50 doi:10.1136/postgradmedj-2015-133919  
51 75. Hameed TK, Masuadi E, Al Asmary NA, Al-Anzi FG, Al Dubayee MS. A study of resident duty hours and  
52 burnout in a sample of Saudi residents. *BMC Med Educ.* 2018;18(1 PG-180):180.  
53 doi:<https://dx.doi.org/10.1186/s12909-018-1300-5>  
54 76. Hannan E, Breslin N, Doherty E, McGreal M, Moneley D, Offiah G. Burnout and stress amongst interns in  
55 Irish hospitals: contributing factors and potential solutions. *Ir J Med Sci.* 2018;187(2 PG-301-307):301-307.  
56 doi:<http://dx.doi.org/10.1007/s11845-017-1688-7>  
57 77. Hausler M, Strecker C, Huber A, Brenner M, Hoge T, Hofer S. Associations between the Application of  
58 Signature Character Strengths, Health and Well-being of Health Professionals. *Front Psychol.* 2017;8(PG-  
59  
60

- 1307):1307. doi:<https://dx.doi.org/10.3389/fpsyg.2017.01307>
78. Henning MA, Sollers J, Strom JM, et al. Junior doctors in their first year: mental health, quality of life, burnout and heart rate variability. *Perspect Med Educ*. 2014;3(2 PG-136-43):136-143. doi:<https://dx.doi.org/10.1007/s40037-013-0075-y>
  79. Hill JD, Smith RJH. Monitoring stress levels in postgraduate medical training. *Laryngoscope*. 2009;119(1 PG-75-8):75-78. doi:<https://dx.doi.org/10.1002/lary.20013>
  80. Hillhouse JJ, Adler CM, Walters DN. A simple model of stress, burnout and symptomatology in medical residents: A longitudinal study. *Psychol Heal Med*. 2000;5(1 PG-63-73):63-73. doi:<http://dx.doi.org/10.1080/135485000106016>
  81. Holmes EG, Connolly A, Putnam KT, et al. Taking Care of Our Own: A Multispecialty Study of Resident and Program Director Perspectives on Contributors to Burnout and Potential Interventions. *Acad Psychiatry*. 2017;41(2 PG-159-166):159-166. doi:<http://dx.doi.org/10.1007/s40596-016-0590-3>
  82. Huggard P, Dixon R. "Tired of caring": The impact of caring on resident doctors. *Australas J Disaster Trauma Stud*. 2011;2011(3 PG-105-111):105-111. <http://ovidsp.ovid.com/ovidweb.cgi?T=JS&PAGE=reference&D=psyc8&NEWS=N&AN=2012-03764-004NS>
  83. Hutter MM, Kellogg KC, Ferguson CM, Abbott WM, Warshaw AL. The impact of the 80-hour resident workweek on surgical residents and attending surgeons. *Ann Surg*. 2006;243(6 PG-864-871):864-871. doi:<http://dx.doi.org/10.1097/01.sla.0000220042.48310.66>
  84. S Hwang J, A Ippolito J, S Beebe K, Benevenia J, S Berberian W. Dealing with the loss of a resident: An analysis of burnout rates in a reduced complement training program. *Work*. 2018;(PG-). doi:<https://dx.doi.org/10.3233/WOR-182764>
  85. Hyman SA, Michaels DR, Berry JM, Schildcrout JS, Mercaldo ND, Weinger MB. Risk of burnout in perioperative clinicians: a survey study and literature review. *Anesthesiology*. 2011;114(1 PG-194-204):194-204. doi:<https://dx.doi.org/10.1097/ALN.0b013e318201ce9a>
  86. Jamjoom RS, Park YS. Assessment of pediatric residents burnout in a tertiary academic centre. *Saudi Med J*. 2018;39(3 PG-296-300):296-300. doi:<http://dx.doi.org/10.15537/smj.2018.3.22328>
  87. Jin WM, Zhang Y, Wang XP. Job burnout and organizational justice among medical interns in Shanghai, People's Republic of China. *Adv Med Educ Pract*. 2015;6(PG-539-544):539-544. doi:10.2147/amep.s88953
  88. Joaquim A, Custodio S, Savva-Bordalo J, et al. Burnout and occupational stress in the medical residents of Oncology, Haematology and Radiotherapy: a prevalence and predictors study in Portugal. *Psychol Health Med*. 2018;23(3 PG-317-324):317-324. doi:<https://dx.doi.org/10.1080/13548506.2017.1344256>
  89. Jovanovic N, Podlesek A, Volpe U, et al. Burnout syndrome among psychiatric trainees in 22 countries: Risk increased by long working hours, lack of supervision, and psychiatry not being first career choice. *Eur Psychiatry*. 2016;32(PG-34-41):34-41. doi:10.1016/j.eurpsy.2015.10.007
  90. Kang E-K, Lihm H-S, Kong E-H. Association of intern and resident burnout with self-reported medical errors. *Korean J Fam Med*. 2013;34(1 PG-36-42):36-42. doi:<https://dx.doi.org/10.4082/kjfm.2013.34.1.36>
  91. Karaoglu N, Pekcan S, Durduran Y, Mergen H, Odabasi D, Ors R. A sample of paediatric residents' loneliness-anxiety-depression-burnout and job satisfaction with probable affecting factors. *J Pak Med Assoc*. 2015;65(2 PG-183-191):183-191. <http://jpma.org.pk/PdfDownload/7168.pdf>  
<http://ovidsp.ovid.com/ovidweb.cgi?T=JS&PAGE=reference&D=emed17&NEWS=N&AN=603983631NS>
  92. Kash KM, Holland JC, Breitbart W, et al. Stress and burnout in oncology. *Oncol York*. 2000;14(11 PG-1621-+):1621-+.
  93. Kassam A, Horton J, Shoimer I, Patten S. Predictors of Well-Being in Resident Physicians: A Descriptive and Psychometric Study. *J Grad Med Educ*. 2015;7(1 PG-70-74):70-74. doi:<http://dx.doi.org/10.4300/JGME-D-14-00022.1>
  94. Kealy D, Halli P, Ogrodniczuk JS, Hadjipavlou G. Burnout among Canadian Psychiatry Residents: A National Survey. *Can J Psychiatry*. 2016;61(11 PG-732-736):732-736. doi:<http://dx.doi.org/10.1177/0706743716645286>
  95. Kolarik RC, O'Neal RL, Ewing JA. Resident Preferences for Program Director Role in Wellness Management. *J Gen Intern Med*. 2018;(PG-1-5):1-5. doi:<http://dx.doi.org/10.1007/s11606-018-4367-0>
  96. Komur I, Ozdemirel RO, Ozver I, et al. Posttraumatic Stress and Burnout Symptoms in Forensic Doctors and Staff in a Mortuary. *Am J Forensic Med Pathol*. 2017;38(3 PG-184-188):184-188. doi:<http://dx.doi.org/10.1097/PAF.0000000000000329>
  97. Krug MF, Golob AL, Wander PL, Wipf JE. Changes in Resident Well-Being at One Institution Across a

- Decade of Progressive Work Hours Limitations. *Acad Med*. 2017;92(10 PG-1480-1484):1480-1484. doi:<http://dx.doi.org/10.1097/ACM.0000000000001675>
98. Kwah J, Weintraub J, Fallar R, Ripp J. The Effect of Burnout on Medical Errors and Professionalism in First-Year Internal Medicine Residents. *J Grad Med Educ*. 2016;8(4 PG-597-600):597-600. <http://ovidsp.ovid.com/ovidweb.cgi?T=JS&PAGE=reference&D=emexa&NEWS=N&AN=615609921> NS -
99. Lambden JP, Chamberlin P, Kozlov E, et al. Association of Perceived Futile or Potentially Inappropriate Care With Burnout and Thoughts of Quitting Among Health-Care Providers. *Am J Hosp Palliat Care*. 2018;(PG-1049909118792517):1049909118792517. doi:<https://dx.doi.org/10.1177/1049909118792517>
100. Landrigan CP, Fahrenkopf AM, Lewin D, et al. Effects of the Accreditation Council for Graduate Medical Education Duty Hour Limits on Sleep, Work Hours, and Safety. *Pediatrics*. 2008;122(2):250-258. doi:10.1542/peds.2007-2306
101. Leach PK, Nygaard RM, Chipman JG, Brunsvold ME, Marek AP. Impostor Phenomenon and Burnout in General Surgeons and General Surgery Residents. *J Surg Educ*. 2018;(PG-). doi:<https://dx.doi.org/10.1016/j.jsurg.2018.06.025>
102. Lebares CC, Guvva E V, Ascher NL, O'Sullivan PS, Harris HW, Epel ES. Burnout and Stress Among US Surgery Residents: Psychological Distress and Resilience. *J Am Coll Surg*. 2018;226(1 PG-80-90):80-90. doi:<http://dx.doi.org/10.1016/j.jamcollsurg.2017.10.010>
103. Lebensohn P, Dodds S, Benn R, et al. Resident wellness behaviors: relationship to stress, depression, and burnout. *Fam Med*. 2013;45(8 PG-541-549):541-549. <http://ovidsp.ovid.com/ovidweb.cgi?T=JS&PAGE=reference&D=emed15&NEWS=N&AN=563066226> NS -
104. Lee PT, Loh J, Sng G, Tung J, Yeo KK. Empathy and burnout: A study on residents from a Singapore institution. *Singapore Med J*. 2018;59(1 PG-50-54):50-54. doi:<http://dx.doi.org/10.11622/smedj.2017096>
105. Lemkau JP. Sex Role Stress and Job Burnout among Family Practice Physicians. *J Vocat Behav*. 1987;31(1 PG-81-90):81-90. <http://libaccess.mcmaster.ca/login?url=https://search.proquest.com/docview/63148790?accountid=12347> [http://sfx.scholarsportal.info/mcmaster?url\\_ver=Z39.88-2004&rft\\_val\\_fmt=info:ofi/fmt:kev:mtx:journal&genre=article&sid=ProQ:ProQ%3Aeric&atitle=Sex+Role+Str](http://sfx.scholarsportal.info/mcmaster?url_ver=Z39.88-2004&rft_val_fmt=info:ofi/fmt:kev:mtx:journal&genre=article&sid=ProQ:ProQ%3Aeric&atitle=Sex+Role+Str).
106. Leung J, Rioseco P. Burnout, stress and satisfaction among Australian and New Zealand radiation oncology trainees. *J Med Imaging Radiat Oncol*. 2017;61(1 PG-146-155):146-155. doi:10.1111/1754-9485.12541
107. Levin KH, Shanafelt TD, Keran CM, et al. Burnout, career satisfaction, and well-being among US neurology residents and fellows in 2016. *Neurology*. 2017;89(5 PG-492-501):492-501. doi:<http://dx.doi.org/10.1212/WNL.0000000000004135>
108. Lin DT, Liebert CA, Tran J, Lau JN, Salles A. Emotional Intelligence as a Predictor of Resident Well-Being. *J Am Coll Surg*. 2016;223(2 PG-352-358):352-358. doi:<http://dx.doi.org/10.1016/j.jamcollsurg.2016.04.044>
109. Lindeman BM, Sacks BC, Hirose K, Lipsett PA. Multifaceted longitudinal study of surgical resident education, quality of life, and patient care before and after July 2011. *J Surg Educ*. 2013;70(6 PG-769-776):769-776. doi:<http://dx.doi.org/10.1016/j.jsurg.2013.06.018>
110. Lindeman B, Petrusa E, McKinley S, et al. Association of Burnout With Emotional Intelligence and Personality in Surgical Residents: Can We Predict Who Is Most at Risk? *J Surg Educ*. 2017;74(6 PG-22-30):e22-e30. doi:<http://dx.doi.org/10.1016/j.jsurg.2017.11.001>
111. Llera J, Durante E. Correlation between the educational environment and burn-out syndrome in residency programs at a university hospital. *Arch Argent Pediatr*. 2014;112(1 PG-6-11):6-11. doi:<http://dx.doi.org/10.1590/S0325-00752014000100003>
112. Low JM, Tan MY, See KC, Aw MM. Sleep, activity and fatigue reported by postgraduate year 1 residents: a prospective cohort study comparing the effects of night-float versus traditional overnight on-call. *Singapore Med J*. 2018;(PG-). doi:<https://dx.doi.org/10.11622/smedj.2018036>
113. Lue B-H, Chen H-J, Wang C-W, Cheng Y, Chen M-C. Stress, personal characteristics and burnout among first postgraduate year residents: a nationwide study in Taiwan. *Med Teach*. 2010;32(5 PG-400-7):400-407. doi:<https://dx.doi.org/10.3109/01421590903437188>
114. Malik AA, Bhatti S, Shafiq A, et al. Burnout among surgical residents in a lower-middle income country - Are we any different? *Ann Med Surg*. 2016;9(PG-28-32):28-32. doi:<http://dx.doi.org/10.1016/j.amsu.2016.05.012>

- 1  
2  
3 115. Markwell AL, Wainer Z. The health and wellbeing of junior doctors: insights from a national survey. *Med J Aust.* 2009;191(8 PG-441-4):441-444.  
4 <http://ovidsp.ovid.com/ovidweb.cgi?T=JS&PAGE=reference&D=med6&NEWS=N&AN=19835538> NS -.
- 5 116. Martini S, Arfken CL, Churchill A, Balon R. Burnout comparison among residents in different medical  
6 specialties. *Acad Psychiatry.* 2004;28(3 PG-240-242):240-242.  
7 doi:<http://dx.doi.org/10.1176/appi.ap.28.3.240>
- 8 117. Martini S, Arfken CL, Balon R. Comparison of Burnout Among Medical Residents Before and After the  
9 Implementation of Work Hours Limits. *Acad Psychiatry.* 2006;30(4):352-355. doi:10.1176/appi.ap.30.4.352
- 10 118. McNeeley MF, Perez FA, Chew FS. The emotional wellness of radiology trainees: Prevalence and  
11 predictors of burnout. *Acad Radiol.* 2013;20(5 PG-647-655):647-655.  
12 doi:<http://dx.doi.org/10.1016/j.acra.2012.12.018>
- 13 119. Michels PJ, Probst JC, Godenick MT, Palesch Y. Anxiety and anger among family practice residents: A  
14 South Carolina family practice research consortium study. *Acad Med.* 2003;78(1 PG-69-79):69-79.  
15 <http://www.lww.com/product/?1040-2446>  
16 <http://ovidsp.ovid.com/ovidweb.cgi?T=JS&PAGE=reference&D=emexa&NEWS=N&AN=36105728> NS -.
- 17 120. Miyoshi R, Matsuo H, Takeda R, Komatsu H, Abe H, Ishida Y. Burnout in Japanese residents and its  
18 associations with temperament and character. *Asian J Psychiatry.* 2016;24(PG-5-9):5-9.  
19 doi:<http://dx.doi.org/10.1016/j.ajp.2016.08.009>
- 20 121. Mohammed KA-M, Ali EG, Youssef IM, Fahmy MT, Haggag WE. Depression and burnout among  
21 residents. *Arab J Psychiatry.* 2014;25(1 PG-40-51):40-51. doi:<http://dx.doi.org/10.12816/0004114>
- 22 122. Moloney J, MacDonald J. Psychiatric training in New Zealand. *Aust N Z J Psychiatry.* 2000;34(1 PG-146-  
23 53):146-153.  
24 <http://ovidsp.ovid.com/ovidweb.cgi?T=JS&PAGE=reference&D=med4&NEWS=N&AN=11185928> NS -.
- 25 123. Mordant P, Deneuve S, Rivera C, et al. Quality of Life of Surgical Oncology Residents and Fellows Across  
26 Europe. *J Surg Educ.* 2014;71(2 PG-222-228):222-228. doi:10.1016/j.jsurg.2013.07.010
- 27 124. Msaouel P, Keramaris NC, Tasoulis A, et al. Burnout and training satisfaction of medical residents in  
28 Greece: will the European Work Time Directive make a difference? *Hum Resour Health.* 2010;8(PG-16):16.  
29 doi:<https://dx.doi.org/10.1186/1478-4491-8-16>
- 30 125. Myszkowski N, Villoing B, Zenasni F, Jaury P, Boujut E. Monitoring stress among internal medicine  
31 residents: an experience-driven, practical and short measure. *Psychol Health Med.* 2017;22(6 PG-719-  
32 726):719-726. doi:<http://dx.doi.org/10.1080/13548506.2016.1220599>
- 33 126. Nolan KJ, Writer H, Ladhani M. Wellness in Canadian paediatric residents and their program directors.  
34 *Paediatr Child Heal.* 2017;22(4 PG-199-202):199-202. doi:<http://dx.doi.org/10.1093/pch/pxx050>
- 35 127. O'Connor P, Lydon S, O'Dea A, et al. A longitudinal and multicentre study of burnout and error in Irish  
36 junior doctors. *Postgrad Med J.* 2017;93(1105 PG-660-664):660-664.  
37 doi:<http://dx.doi.org/10.1136/postgradmedj-2016-134626>
- 38 128. Ogundipe OA, Olagunju AT, Lasebikan VO, Coker AO. Burnout among doctors in residency training in a  
39 tertiary hospital. *Asian J Psychiatry.* 2014;10(PG-27-32):27-32.  
40 doi:<http://dx.doi.org/10.1016/j.ajp.2014.02.010>
- 41 129. Okpozo AZ, Gong T, Ennis MC, Adenuga B. Investigating the impact of ethical leadership on aspects of  
42 burnout. *Leadersh Organ Dev J.* 2017;38(8 PG-1128-1143):1128-1143.  
43 doi:<http://dx.doi.org/10.1108/LODJ-09-2016-0224>
- 44 130. Olson SM, Odo NU, Duran AM, Pereira AG, Mandel JH. Burnout and Physical Activity in Minnesota  
45 Internal Medicine Resident Physicians. *J Grad Med Educ.* 2014;6(4):669-674. doi:10.4300/JGME-D-13-  
46 00396
- 47 131. Olson K, Kemper KJ, Mahan JD. What Factors Promote Resilience and Protect Against Burnout in First-  
48 Year Pediatric and Medicine-Pediatric Residents? *J Evid Based Complementary Altern Med.*  
49 2015;20(3):192-198. doi:10.1177/2156587214568894
- 50 132. Panagopoulou E, Montgomery A, Benos A. Burnout in internal medicine physicians: Differences between  
51 residents and specialists. *Eur J Intern Med.* 2006;17(3 PG-195-200):195-200.  
52 doi:<http://dx.doi.org/10.1016/j.ejim.2005.11.013>
- 53 133. Pantaleoni JL, Augustine EM, Sourkes BM, Bachrach LK. Burnout in pediatric residents over a 2-year  
54 period: A longitudinal study. *Acad Pediatr.* 2014;14(2 PG-167-172):167-172.  
55 doi:<http://dx.doi.org/10.1016/j.acap.2013.12.001>
- 56 134. Park C, Lee YJ, Hong M, et al. A Multicenter Study Investigating Empathy and Burnout Characteristics in  
57 Medical Residents with Various Specialties. *J Korean Med Sci.* 2016;31(4 PG-590-597):590-597.  
58  
59  
60

- doi:<http://dx.doi.org/10.3346/jkms.2016.31.4.590>
135. Parr JM, Pinto N, Hanson M, Meehan A, Moore PT. Medical graduates, tertiary hospitals, and burnout: A longitudinal cohort study. *Ochsner J*. 2016;16(1 PG-22-26):22-26. <http://www.ochsnerjournal.org/doi/pdf/10.1043/TOJ-14-0055> <http://ovidsp.ovid.com/ovidweb.cgi?T=JS&PAGE=reference&D=emed18&NEWS=N&AN=609110258> NS -.
136. Pereira-Lima K, Loureiro SR. Burnout, anxiety, depression, and social skills in medical residents. *Psychol Health Med*. 2015;20(3 PG-353-362):353-362. doi:<http://dx.doi.org/10.1080/13548506.2014.936889>
137. Porrino J, Mulcahy MJ, Mulcahy H, Relyea-Chew A, Chew FS. Emotional Wellness of Current Musculoskeletal Radiology Fellows. *Acad Radiol*. 2017;24(6 PG-682-693):682-693. doi:<http://dx.doi.org/10.1016/j.acra.2016.12.024>
138. Prins JT, Hoekstra-Weebers J, van de Wiel HBM, Gazendam-Donofrio SM, Sprangers F, Jaspers FCA. Burnout among Dutch medical residents. *Int J Behav Med*. 2007;14(3 PG-119-125):119-125. doi:10.1007/bf03000182
139. Prins JT, Hoekstra-Weebers JEHM, Gazendam-Donofrio SM, et al. Burnout and engagement among resident doctors in the Netherlands: a national study. *Med Educ*. 2010;44(3 PG-236-47):236-247. doi:<https://dx.doi.org/10.1111/j.1365-2923.2009.03590.x>
140. Purdy RR, Lemkau JP, Rafferty JP, Rudisill JR. Resident physicians in family practice: who's burned out and who knows? *Fam Med*. 1987;19(3):203-208. <http://www.ncbi.nlm.nih.gov/pubmed/3596113>. Accessed June 29, 2019.
141. Racic M, Virijevic A, Ivkovic N, Joksimovic BN, Joksimovic VR, Mijovic B. Compassion fatigue and compassion satisfaction among family physicians in the Republic of Srpska, Bosnia and Herzegovina. *Int J Occup Saf Ergon*. 2018;(PG-1-8):1-8. doi:<https://dx.doi.org/10.1080/10803548.2018.1440044>
142. Ramey SJ, Ahmed AA, Takita C, Wilson LD, Thomas CR, Yechieli R. Burnout Evaluation of Radiation Residents Nationwide: Results of a Survey of United States Residents. *Int J Radiat Oncol Biol Phys*. 2017;99(3 PG-530-538):530-538. doi:<http://dx.doi.org/10.1016/j.ijrobp.2017.06.014>
143. Ratnakaran B, Prabhakaran A, Karunakaran V. Prevalence of burnout and its correlates among residents in a tertiary medical center in Kerala, India: A cross-sectional study. *J Postgrad Med*. 2016;62(3 PG-157-161):157-161. doi:<http://dx.doi.org/10.4103/0022-3859.184274>
144. Raviola G, Machoki M, Mwaikambo E, Good MJD. HIV, disease plague, demoralization and "burnout": resident experience of the medical profession in Nairobi, Kenya. *Cult Med Psychiatry*. 2002;26(1):55-86. <http://www.ncbi.nlm.nih.gov/pubmed/12088098>. Accessed June 29, 2019.
145. Ringrose R, Houterman S, Koops W, Oei G. Burnout in medical residents: A questionnaire and interview study. *Psychol Heal Med*. 2009;14(4 PG-476-486):476-486. doi:<http://dx.doi.org/10.1080/13548500903012822>
146. Ripp J, Fallar R, Babyatsky M, David R, Reich L, Korenstein D. Prevalence of resident burnout at the start of training. *Teach Learn Med*. 2010;22(3 PG-172-5):172-175. doi:<https://dx.doi.org/10.1080/10401334.2010.488194>
147. Ripp J, Babyatsky M, Fallar R, et al. The incidence and predictors of job burnout in first-year internal medicine residents: a five-institution study. *Acad Med*. 2011;86(10 PG-1304-10):1304-1310. doi:<https://dx.doi.org/10.1097/ACM.0b013e31822c1236>
148. Ripp JA, Bellini L, Fallar R, Bazari H, Katz JT, Korenstein D. The impact of duty hours restrictions on job burnout in internal medicine residents: a three-institution comparison study. *Acad Med*. 2015;90(4 PG-494-499):494-499. doi:<http://dx.doi.org/10.1097/ACM.0000000000000641>
149. Robertson SL, Robinson MD, Reid A. Electronic Health Record Effects on Work-Life Balance and Burnout Within the I3 Population Collaborative. *J Grad Med Educ*. 2017;9(4 PG-479-484):479-484. doi:<http://dx.doi.org/10.4300/JGME-D-16-00123.1>
150. Rogers ME, Creed PA, Searle J. Emotional labour, training stress, burnout, and depressive symptoms in junior doctors. *J Vocat Educ Train*. 2014;66(2 PG-232-248):232-248. NS -.
151. Rogers E, Polonijo AN, Carpiano RM. Getting by with a little help from friends and colleagues: Testing how residents' social support networks affect loneliness and burnout. *Can Fam Physician*. 2016;62(11 PG-677-683):e677-e683. <http://www.cfp.ca/content/62/11/e677.full.pdf+html> <http://ovidsp.ovid.com/ovidweb.cgi?T=JS&PAGE=reference&D=emed18&NEWS=N&AN=613299251> NS -.
152. Rosen IM, Gimotty PA, Shea JA, Bellini LM. Evolution of sleep quantity, sleep deprivation, mood disturbances, empathy, and burnout among interns. *Acad Med*. 2006;81(1 PG-82-85):82-85.

- doi:<http://dx.doi.org/10.1097/00001888-200601000-00020>
153. Rui M, Ting C, Pengqian F, Xinqiao F. Burnout among anaesthetists in Chinese hospitals: a multicentre, cross-sectional survey in 6 provinces. *J Eval Clin Pract.* 2016;22(3):387-394. doi:10.1111/jep.12498
  154. Ruitenburg MM, Frings-Dresen MH, Sluiter JK. The prevalence of common mental disorders among hospital physicians and their association with self-reported work ability: a cross-sectional study. *BMC Health Serv Res.* 2012;12(1):292. doi:10.1186/1472-6963-12-292
  155. Sajjadi S, Norena M, Wong H, Dodek P. Moral distress and burnout in internal medicine residents. *Can Med Educ J.* 2017;8(1 PG-36-43):e36-e43.  
<http://ovidsp.ovid.com/ovidweb.cgi?T=JS&PAGE=reference&D=prem&NEWS=N&AN=28344714> NS -.
  156. Salles A, Cohen GL, Mueller CM. The relationship between grit and resident well-being. *Am J Surg.* 2014;207(2 PG-251-254):251-254. doi:<http://dx.doi.org/10.1016/j.amjsurg.2013.09.006>
  157. Salpigktidis II, Paliouras D, Gogakos AS, et al. Burnout syndrome and job satisfaction in Greek residents: exploring differences between trainees inside and outside the country. *Ann Transl Med.* 2016;4(22 PG-444):444. doi:<https://dx.doi.org/10.21037/atm.2016.11.33>
  158. Sargent MC, Sotile W, Sotile MO, Rubash H, Barrack RL. Stress and coping among orthopaedic surgery residents and faculty. *J Bone Jt Surg - Ser A.* 2004;86(7 PG-1579-1586):1579-1586.  
<http://ovidsp.ovid.com/ovidweb.cgi?T=JS&PAGE=reference&D=emed9&NEWS=N&AN=38886551> NS -.
  159. Sargent MC, Sotile W, Sotile MO, Rubash H, Barrack RL. Quality of life during orthopaedic training and academic practice. Part I: Orthopaedic surgery residents and faculty. *J Bone Jt Surg - Ser A.* 2009;91(10 PG-2395-2405):2395-2405. doi:<http://dx.doi.org/10.2106/JBJS.H.00665>
  160. Satterfield J, Swenson S, Rabow M. Emotional Intelligence in Internal Medicine Residents: Educational Implications for Clinical Performance and Burnout. *Ann Behav Sci Med Educ.* 2009;14(2 PG-65-68):65-68.  
<http://ovidsp.ovid.com/ovidweb.cgi?T=JS&PAGE=reference&D=medp&NEWS=N&AN=20407619> NS -.
  161. Schweitzer B. Stress and burnout in junior doctors. *S Afr Med J.* 1994;84(6 PG-352-4):352-354.  
<http://ovidsp.ovid.com/ovidweb.cgi?T=JS&PAGE=reference&D=med3&NEWS=N&AN=7740383> NS -.
  162. See KC, Lim TK, Kua EH, Phua J, Chua GS, Ho KY. Stress and Burnout among Physicians: Prevalence and Risk Factors in a Singaporean Internal Medicine Programme. *Ann Acad Med Singapore.* 2016;45(10 PG-471-474):471-474.  
<http://ovidsp.ovid.com/ovidweb.cgi?T=JS&PAGE=reference&D=med8&NEWS=N&AN=27832222> NS -.
  163. Selic P, Stegne-Ignjatovic T, Klemenc-Ketis Z. Burnout among Slovenian family medicine trainees: A cross-sectional study. *Zdr Vestn.* 2012;81(3 PG-218-224):218-224.  
<http://vestnik.sz.d.si/index.php/vestnik/article/download/764/680>  
<http://ovidsp.ovid.com/ovidweb.cgi?T=JS&PAGE=reference&D=emed14&NEWS=N&AN=364528464> NS -.
  164. Shakir HJ, McPheeters MJ, Shallwani H, Pittari JE, Reynolds RM. The Prevalence of Burnout Among US Neurosurgery Residents. *Neurosurgery.* 2017;(PG-). doi:<https://dx.doi.org/10.1093/neuros/nyx494>
  165. Shams T, El-Masry R. Job Stress and Burnout among Academic Career Anaesthesiologists at an Egyptian University Hospital. *Sultan Qaboos Univ Med J.* 2013;13(2):287-295.  
<http://www.ncbi.nlm.nih.gov/pubmed/23862036>. Accessed June 29, 2019.
  166. Shanafelt TD, Bradley KA, Wipf JE, Back AL. Burnout and self-reported patient care in an internal medicine residency program. *Ann Intern Med.* 2002;136(5 PG-358-367):358-367.  
<http://ovidsp.ovid.com/ovidweb.cgi?T=JS&PAGE=reference&D=emed8&NEWS=N&AN=34183994> NS -.
  167. Shanafelt TD, Raymond M, Horn L, et al. Oncology Fellows' Career Plans, Expectations, and Well-Being: Do Fellows Know What They Are Getting Into? *J Clin Oncol.* 2014;32(27 PG-2991-+):2991-+.  
doi:10.1200/jco.2014.56.2827
  168. Shapiro MC, Rao SR, Dean J, Salama AR. What a Shame: Increased Rates of OMS Resident Burnout May Be Related to the Frequency of Shamed Events During Training. *J Oral Maxillofac Surg.* 2017;75(3 PG-449-457):449-457. doi:<http://dx.doi.org/10.1016/j.joms.2016.08.040>
  169. Shoimer I, Patten S, Mydlarski PR. Burnout in dermatology residents: a Canadian perspective. *Br J Dermatol.* 2018;178(1 PG-270-271):270-271. doi:<http://dx.doi.org/10.1111/bjd.15549>
  170. Simpkin AL, Khan A, West DC, et al. Stress From Uncertainty and Resilience Among Depressed and Burned Out Residents: A Cross-Sectional Study. *Acad Pediatr.* 2018;(PG-).  
doi:<http://dx.doi.org/10.1016/j.acap.2018.03.002>
  171. Siu CFY, Yuen SK, Cheung A. Burnout among public doctors in Hong Kong: cross-sectional survey. *Hong Kong Med J.* 2012;18(3 PG-186-192):186-192.
  172. Sochos A, Bowers A. Burnout, occupational stressors, and social support in psychiatric and medical

- 1  
2  
3 trainees. *Eur J Psychiatry*. 2012;26(3 PG-196-206):196-206. doi:10.4321/s0213-61632012000300006
- 4 173. Spataro BM, Tilstra SA, Rubio DM, McNeil MA. The Toxicity of Self-Blame: Sex Differences in Burnout  
5 and Coping in Internal Medicine Trainees. *J Women's Heal*. 2016;25(11 PG-1147-1152):1147-1152.  
6 doi:http://dx.doi.org/10.1089/jwh.2015.5604
- 7 174. Stodel JM, Stewart-Smith A. The influence of burnout on skills retention of junior doctors at Red Cross War  
8 Memorial Children's Hospital: a case study. *S Afr Med J*. 2011;101(2 PG-115-8):115-118.  
9 http://ovidsp.ovid.com/ovidweb.cgi?T=JS&PAGE=reference&D=med7&NEWS=N&AN=21678738 NS -.
- 10 175. Sulaiman CFC, Henn P, Smith S, O'Tuathaigh CMP. Burnout syndrome among non-consultant hospital  
11 doctors in Ireland: relationship with self-reported patient care. *Int J Qual Heal care J Int Soc Qual Heal*  
12 *Care*. 2017;29(5 PG-679-684):679-684. doi:https://dx.doi.org/10.1093/intqhc/mzx087
- 13 176. Swami MK, Mathur DM, Pushp BK. Emotional intelligence, perceived stress and burnout among resident  
14 doctors: An assessment of the relationship. *Natl Med J India*. 2013;26(4 PG-210-213):210-213.  
15 http://www.nmji.in/archives/Volume-26/Issue-4/OA-III.pdf  
16 http://ovidsp.ovid.com/ovidweb.cgi?T=JS&PAGE=reference&D=emed15&NEWS=N&AN=372957372 NS
- 17 -.
- 18 177. Talih F, Warakian R, Ajaltouni J, Shehab AA, Tamim H. Correlates of Depression and Burnout Among  
19 Residents in a Lebanese Academic Medical Center: a Cross-Sectional Study. *Acad Psychiatry*. 2016;40(1  
20 PG-38-45):38-45. doi:http://dx.doi.org/10.1007/s40596-015-0400-3
- 21 178. Toral-Villanueva R, Aguilar-Madrid G, Juarez-Perez CA. Burnout and patient care in junior doctors in  
22 Mexico City. *Occup Med (Lond)*. 2009;59(1 PG-8-13):8-13. doi:https://dx.doi.org/10.1093/occmed/kqn122
- 23 179. Torppa MA, Kuikka L, Nevalainen M, Pitkala KH. Emotionally exhausting factors in general practitioners'  
24 work. *Scand J Prim Health Care*. 2015;33(3 PG-178-183):178-183. doi:10.3109/02813432.2015.1067514
- 25 180. Trockel M, Bohman B, Lesure E, et al. A Brief Instrument to Assess Both Burnout and Professional  
26 Fulfillment in Physicians: Reliability and Validity, Including Correlation with Self-Reported Medical Errors,  
27 in a Sample of Resident and Practicing Physicians. *Acad Psychiatry*. 2018;42(1 PG-11-24):11-24.  
28 doi:https://dx.doi.org/10.1007/s40596-017-0849-3
- 29 181. Turgut N, Karacalar S, Polat C, et al. Burnout Syndrome During Residency. *Turkish J Anaesthesiol Reanim*.  
30 2016;44(5 PG-258-264):258-264.  
31 http://ovidsp.ovid.com/ovidweb.cgi?T=JS&PAGE=reference&D=prem&NEWS=N&AN=27909607 NS -.
- 32 182. Tzischinsky O, Zohar D, Epstein R, Chillag N, Lavie P. Daily and yearly burnout symptoms in Israeli shift  
33 work residents. *J Hum Ergol (Tokyo)*. 2001;30(1-2):357-362.  
34 http://www.ncbi.nlm.nih.gov/pubmed/14564908. Accessed June 29, 2019.
- 35 183. van der Wal RAB, Bucx MJL, Hendriks JCM, Scheffer GJ, Prins JB. Psychological distress, burnout and  
36 personality traits in Dutch anaesthesiologists A survey. *Eur J Anaesthesiol*. 2016;33(3 PG-179-186):179-  
37 186. doi:10.1097/eja.0000000000000375
- 38 184. van Vendeloo SN, Brand PLP, Verheyen CCPM. Burnout and quality of life among orthopaedic trainees in  
39 a modern educational programme: importance of the learning climate. *Bone Joint J*. 2014;96-B(8 PG-1133-  
40 8):1133-1138. doi:https://dx.doi.org/10.1302/0301-620X.96B8.33609
- 41 185. van Vendeloo SN, Godderis L, Brand PLP, Verheyen K, Rowell SA, Hoekstra H. Resident burnout:  
42 evaluating the role of the learning environment. *Bmc Med Educ*. 2018;18(PG-). doi:10.1186/s12909-018-  
43 1166-6
- 44 186. van Vendeloo SN, Prins DJ, Verheyen C, et al. The learning environment and resident burnout: a national  
45 study. *Perspect Med Educ*. 2018;7(2 PG-120-125):120-125. doi:10.1007/s40037-018-0405-1
- 46 187. Waheed K, Liaqat N, Ejaz S, et al. Burnout among gynaecological residents in lahore, Pakistan: A cross-  
47 sectional survey. *J Pak Med Assoc*. 2017;67(9 PG-1318-1322):1318-1322.  
48 http://jpma.org.pk/PdfDownload/8342.pdf  
49 http://ovidsp.ovid.com/ovidweb.cgi?T=JS&PAGE=reference&D=emexa&NEWS=N&AN=617643712 NS
- 50 -.
- 51 188. Waldman S V, Lopez Diez JC, Arazi HC, Linetzky B, Guinjoan S, Grancelli H. Burnout, perceived stress,  
52 and depression among cardiology residents in Argentina. *Acad Psychiatry*. 2009;33(4 PG-296-301):296-  
53 301. doi:http://dx.doi.org/10.1176/appi.ap.33.4.296
- 54 189. Weigl M, Schneider A, Hoffmann F, Angerer P. Work stress, burnout, and perceived quality of care: a  
55 cross-sectional study among hospital pediatricians. *Eur J Pediatr*. 2015;174(9 PG-1237-1246):1237-1246.  
56 doi:10.1007/s00431-015-2529-1
- 57 190. West CP, Tan AD, Habermann TM, Sloan JA, Shanafelt TD. Association of resident fatigue and distress  
58 with perceived medical errors. *JAMA - J Am Med Assoc*. 2009;302(12 PG-1294-1300):1294-1300.
- 59  
60



- 1  
2  
3 doi:<http://dx.doi.org/10.1001/jama.2009.1389>
- 4 191. Willcock SM, Daly MG, Tennant CC, Allard BJ. Burnout and psychiatric morbidity in new medical  
5 graduates. *Med J Aust.* 2004;181(7 PG-357-360):357-360.  
6 <http://ovidsp.ovid.com/ovidweb.cgi?T=JS&PAGE=reference&D=emed9&NEWS=N&AN=39341646> NS -.
- 7 192. Williford ML, Scarlet S, Meyers MO, et al. Multiple-Institution Comparison of Resident and Faculty  
8 Perceptions of Burnout and Depression During Surgical Training. *JAMA Surg.* 2018;(PG-).  
9 doi:<https://dx.doi.org/10.1001/jamasurg.2018.0974>
- 10 193. Woodside Jr JR, Miller MN, Floyd MR, McGowen KR, Pfortmiller DT. Observations on burnout in family  
11 medicine and psychiatry residents. *Acad Psychiatry.* 2008;32(1 PG-13-19):13-19.  
12 doi:<http://dx.doi.org/10.1176/appi.ap.32.1.13>
- 13 194. Yroni A, Fournier C, Fourcade O, Schmitt L. Burnout compared between anaesthesiology and psychiatry  
14 residents in France: An observational study. *Eur J Anaesthesiol.* 2017;34(7 PG-480-482):480-482.  
15 doi:<https://dx.doi.org/10.1097/EJA.0000000000000573>
- 16 195. Zis P, Anagnostopoulos F, Sykioti P. Burnout in medical residents: A study based on the job demands-  
17 resources model. *Sci World J.* 2014;2014(PG-673279):673279. doi:<http://dx.doi.org/10.1155/2014/673279>
- 18 196. Zis P, Artemiadis AK, Lykouri M, et al. Residency Training: Determinants of burnout of neurology trainees  
19 in Attica, Greece. *Neurology.* 2015;85(11 PG-81-84):e81-e84.  
20 doi:<http://dx.doi.org/10.1212/WNL.0000000000001924>
- 21 197. Zubairi AJ, Noordin S. Factors associated with burnout among residents in a developing country. *Ann Med*  
22 *Surg.* 2016;6(PG-60-63):60-63. doi:<http://dx.doi.org/10.1016/j.amsu.2016.01.090>
- 23  
24  
25  
26  
27  
28  
29  
30  
31  
32  
33  
34  
35  
36  
37  
38  
39  
40  
41  
42  
43  
44  
45  
46  
47  
48  
49  
50  
51  
52  
53  
54  
55  
56  
57  
58  
59  
60

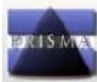

# PRISMA 2009 Checklist

1  
2  
3  
4  
5  
6  
7  
8  
9  
10  
11  
12  
13  
14  
15  
16  
17  
18  
19  
20  
21  
22  
23  
24  
25  
26  
27  
28  
29  
30  
31  
32  
33  
34  
35  
36  
37  
38  
39  
40  
41  
42  
43  
44  
45  
46  
47

| Section/topic                      | #  | Checklist item                                                                                                                                                                                                                                                                                              | Reported on page #  |
|------------------------------------|----|-------------------------------------------------------------------------------------------------------------------------------------------------------------------------------------------------------------------------------------------------------------------------------------------------------------|---------------------|
| <b>TITLE</b>                       |    |                                                                                                                                                                                                                                                                                                             |                     |
| Title                              | 1  | Identify the report as a systematic review, meta-analysis, or both.                                                                                                                                                                                                                                         | 1                   |
| <b>ABSTRACT</b>                    |    |                                                                                                                                                                                                                                                                                                             |                     |
| Structured summary                 | 2  | Provide a structured summary including, as applicable: background; objectives; data sources; study eligibility criteria, participants, and interventions; study appraisal and synthesis methods; results; limitations; conclusions and implications of key findings; systematic review registration number. | 2                   |
| <b>INTRODUCTION</b>                |    |                                                                                                                                                                                                                                                                                                             |                     |
| Rationale                          | 3  | Describe the rationale for the review in the context of what is already known.                                                                                                                                                                                                                              | 3                   |
| Objectives                         | 4  | Provide an explicit statement of questions being addressed with reference to participants, interventions, comparisons, outcomes, and study design (PICOS).                                                                                                                                                  | 3                   |
| <b>METHODS</b>                     |    |                                                                                                                                                                                                                                                                                                             |                     |
| Protocol and registration          | 5  | Indicate if a review protocol exists, if and where it can be accessed (e.g., Web address), and, if available, provide registration information including registration number.                                                                                                                               | 3                   |
| Eligibility criteria               | 6  | Specify study characteristics (e.g., PICOS, length of follow-up) and report characteristics (e.g., years considered, language, publication status) used as criteria for eligibility, giving rationale.                                                                                                      | 4                   |
| Information sources                | 7  | Describe all information sources (e.g., databases with dates of coverage, contact with study authors to identify additional studies) in the search and date last searched.                                                                                                                                  | 3                   |
| Search                             | 8  | Present full electronic search strategy for at least one database, including any limits used, such that it could be repeated.                                                                                                                                                                               | 3, Appendix Table 1 |
| Study selection                    | 9  | State the process for selecting studies (i.e., screening, eligibility, included in systematic review, and, if applicable, included in the meta-analysis).                                                                                                                                                   | 4                   |
| Data collection process            | 10 | Describe method of data extraction from reports (e.g., piloted forms, independently, in duplicate) and any processes for obtaining and confirming data from investigators.                                                                                                                                  | 4                   |
| Data items                         | 11 | List and define all variables for which data were sought (e.g., PICOS, funding sources) and any assumptions and simplifications made.                                                                                                                                                                       | 4                   |
| Risk of bias in individual studies | 12 | Describe methods used for assessing risk of bias of individual studies (including specification of whether this was done at the study or outcome level), and how this information is to be used in any data synthesis.                                                                                      | 4                   |
| Summary measures                   | 13 | State the principal summary measures (e.g., risk ratio, difference in means).                                                                                                                                                                                                                               | 4-5                 |
| Synthesis of results               | 14 | Describe the methods of handling data and combining results of studies, if done, including measures of consistency (e.g., I <sup>2</sup> ) for each meta-analysis.                                                                                                                                          | 4-5                 |

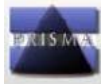

# PRISMA 2009 Checklist

Page 1 of 2

| Section/topic                 | #  | Checklist item                                                                                                                                                                                           | Reported on page #                     |
|-------------------------------|----|----------------------------------------------------------------------------------------------------------------------------------------------------------------------------------------------------------|----------------------------------------|
| Risk of bias across studies   | 15 | Specify any assessment of risk of bias that may affect the cumulative evidence (e.g., publication bias, selective reporting within studies).                                                             | 4                                      |
| Additional analyses           | 16 | Describe methods of additional analyses (e.g., sensitivity or subgroup analyses, meta-regression), if done, indicating which were pre-specified.                                                         | 4-5                                    |
| <b>RESULTS</b>                |    |                                                                                                                                                                                                          |                                        |
| Study selection               | 17 | Give numbers of studies screened, assessed for eligibility, and included in the review, with reasons for exclusions at each stage, ideally with a flow diagram.                                          | 5, Appendix Figure 1                   |
| Study characteristics         | 18 | For each study, present characteristics for which data were extracted (e.g., study size, PICOS, follow-up period) and provide the citations.                                                             | Table 1, Appendix table 2              |
| Risk of bias within studies   | 19 | Present data on risk of bias of each study and, if available, any outcome level assessment (see item 12).                                                                                                | 6                                      |
| Results of individual studies | 20 | For all outcomes considered (benefits or harms), present, for each study: (a) simple summary data for each intervention group (b) effect estimates and confidence intervals, ideally with a forest plot. | Figure 1, Table 1& 2, Appendix table 2 |
| Synthesis of results          | 21 | Present results of each meta-analysis done, including confidence intervals and measures of consistency.                                                                                                  | Page 6-7, Table 3, Figure 4            |
| Risk of bias across studies   | 22 | Present results of any assessment of risk of bias across studies (see Item 15).                                                                                                                          | 7                                      |
| Additional analysis           | 23 | Give results of additional analyses, if done (e.g., sensitivity or subgroup analyses, meta-regression [see Item 16]).                                                                                    | 6-7                                    |
| <b>DISCUSSION</b>             |    |                                                                                                                                                                                                          |                                        |
| Summary of evidence           | 24 | Summarize the main findings including the strength of evidence for each main outcome; consider their relevance to key groups (e.g., healthcare providers, users, and policy makers).                     | 7-8                                    |
| Limitations                   | 25 | Discuss limitations at study and outcome level (e.g., risk of bias), and at review-level (e.g., incomplete retrieval of identified research, reporting bias).                                            | 8                                      |
| Conclusions                   | 26 | Provide a general interpretation of the results in the context of other evidence, and implications for future research.                                                                                  | 9                                      |
| <b>FUNDING</b>                |    |                                                                                                                                                                                                          |                                        |
| For Peer Review Only          |    |                                                                                                                                                                                                          |                                        |

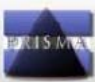

# PRISMA 2009 Checklist

1  
2  
3  
4  
5  
6  
7  
8  
9  
10  
11  
12  
13  
14  
15  
16  
17  
18  
19  
20  
21  
22  
23  
24  
25  
26  
27  
28  
29  
30  
31  
32  
33  
34  
35  
36  
37  
38  
39  
40  
41  
42  
43  
44  
45  
46  
47

|         |    |                                                                                                                                            |   |
|---------|----|--------------------------------------------------------------------------------------------------------------------------------------------|---|
| Funding | 27 | Describe sources of funding for the systematic review and other support (e.g., supply of data); role of funders for the systematic review. | 9 |
|---------|----|--------------------------------------------------------------------------------------------------------------------------------------------|---|

From: Moher D, Liberati A, Tetzlaff J, Altman DG, The PRISMA Group (2009). Preferred Reporting Items for Systematic Reviews and Meta-Analyses: The PRISMA Statement. PLoS Med 6(7): e1000097. doi:10.1371/journal.pmed1000097

For more information, visit: [www.prisma-statement.org](http://www.prisma-statement.org).

Page 2 of 2

Confidential
