# Supplementary material for: Global prevalence of burnout among postgraduate medical trainees: a systematic review and meta-regression
Source: PubMed Central journal article supplement — CMAJ Open. 2021 Mar 8;9(1):E189–200. doi: 10.9778/cmajo.20200068 (PMC8034324; doi:10.9778/cmajo.20200068), 2021-03-08
Supplement: supp_9.1.E189_CMAJOpen-2020-0068-1-at.pdf [file supp_9.1.E189_CMAJOpen-2020-0068-1-at.pdf]

**Appendix 1 (as supplied by the authors): Search Strategy**

| Database     | Search Terms                                                                                                                                                                                                                                                                                                                                                                                                                                                                                                                                                                                                                                                                                                                                                                                                                                                                                                                                                                                                                                                                                                                                                                                                                                       | Yield |
|--------------|----------------------------------------------------------------------------------------------------------------------------------------------------------------------------------------------------------------------------------------------------------------------------------------------------------------------------------------------------------------------------------------------------------------------------------------------------------------------------------------------------------------------------------------------------------------------------------------------------------------------------------------------------------------------------------------------------------------------------------------------------------------------------------------------------------------------------------------------------------------------------------------------------------------------------------------------------------------------------------------------------------------------------------------------------------------------------------------------------------------------------------------------------------------------------------------------------------------------------------------------------|-------|
| EMBASE       | <ol style="list-style-type: none"> <li>1 exp job stress/</li> <li>2 burnout/</li> <li>3 stress/ or acute stress/ or emotional stress/ or mental stress/ or role stress/</li> <li>4 emotional disorder/</li> <li>5 depersonalization/</li> <li>6 deperson*.ti,ab,kw.</li> <li>7 ((emotional* or mental* or physical*) adj2 (fatigue* or exhaust* or drain* or distress*)).ti,ab,kw.</li> <li>8 burnout.ti,ab,kw.</li> <li>9 (stress* adj2 (psychological or emotional or mental or professional or job or work or occupational)).ti,ab,kw.</li> <li>10 compassion fatigue.ti,ab,kw.</li> <li>11 (cynicism or cynical).ti,ab,kw.</li> <li>12 exhaustion/ or fatigue/</li> <li>13 or/1-12</li> <li>14 residency education/</li> <li>15 (intern or interns or internship).ti,ab,kw.</li> <li>16 (resident or residents or residency).ti,ab,kw.</li> <li>17 housemanship*.ti,ab,kw.</li> <li>18 house staff.ti,ab,kw.</li> <li>19 housestaff.ti,ab,kw.</li> <li>20 ((physician or doctor) adj2 training).ti,ab,kw.</li> <li>21 (junio?r doctor* or foundation doctor* or house officer*).ti,ab,kw.</li> <li>22 or/14-21</li> <li>23 13 and 22</li> <li>24 23 not (animals/ not (humans/ and animals/))</li> <li>25 remove duplicates from 24</li> </ol> | 5178  |
| OVID Medline | <ol style="list-style-type: none"> <li>1 occupational stress/</li> <li>2 burnout, professional/</li> <li>3 Stress, Psychological/</li> <li>4 exp Mental Fatigue/</li> <li>5 Affective Symptoms/</li> <li>6 Depersonalization/</li> <li>7 ((emotional* or mental* or physical*) adj2 (fatigu* or exhaust* or drain* or distress*)).ti,ab,kf.</li> <li>8 burnout.ti,ab,kf.</li> <li>9 (stress* adj2 (psychological or emotional or mental or professional or job or work or occupational)).ti,ab,kf.</li> <li>10 (cynicism or cynical).ti,ab,kf.</li> <li>11 (depersonal* or depersonif*).ti,ab,kf.</li> <li>12 compassion fatigue.ti,ab,kf.</li> <li>13 or/1-12</li> <li>14 "Internship and Residency"/</li> <li>15 (intern or interns or internship*).ti,ab,kf.</li> <li>16 (resident or residents or residency).ti,ab,kf.</li> <li>17 housemanship*.ti,ab,kf.</li> <li>18 house staff.ti,ab,kf.</li> <li>19 housestaff.ti,ab,kf.</li> <li>20 ((physician or doctor) adj2 training).ti,ab,kf.</li> </ol>                                                                                                                                                                                                                                           | 2885  |

|                                |                                                                                                                                                                                                                                                                                                                                                                                                                                                                                                                                                                                                                                                                                                                                                                                                                                                                                                                                                                               |      |
|--------------------------------|-------------------------------------------------------------------------------------------------------------------------------------------------------------------------------------------------------------------------------------------------------------------------------------------------------------------------------------------------------------------------------------------------------------------------------------------------------------------------------------------------------------------------------------------------------------------------------------------------------------------------------------------------------------------------------------------------------------------------------------------------------------------------------------------------------------------------------------------------------------------------------------------------------------------------------------------------------------------------------|------|
|                                | <p>21 (junior doctor* or foundation doctor* or house officer*).ti,ab,kf.<br/> 22 or/14-21<br/> 23 13 and 22<br/> 24 remove duplicates from 23<br/> 25 24 not (animals/ not (humans/ and animals/))</p>                                                                                                                                                                                                                                                                                                                                                                                                                                                                                                                                                                                                                                                                                                                                                                        |      |
| Web of Science Core Collection | <p>(TS=(resident or residents or residency or intern or internship or interns or housemanship* or house staff or housestaff or junior doctor* or juniour doctor* or foundation doctor* or house officer*)) AND TS=(burnout or exhaust* or fatigu* or drain* or distress* or depersonif* or depersonal* or job stress* or psychological stress* or emotional stress* or mental stress* or professional stress or job stress or work stress or occupational stress) AND TS=(medical or hospital or clinical)) AND LANGUAGE: (English) AND DOCUMENT TYPES:(Article)<br/> <i>Indexes=SCI-EXPANDED, SSCI, A&amp;HCI, CPCI-S, CPCI-SSH, ESCI Timespan=All years</i></p>                                                                                                                                                                                                                                                                                                             | 2554 |
| PsycINFO                       | <p>1 exp occupational stress/ or occupational neurosis/<br/> 2 PSYCHOLOGICAL STRESS/ or STRESS/<br/> 3 Fatigue/<br/> 4 DEPERSONALIZATION/<br/> 5 (depersonal* or depersonif*).mp.<br/> 6 ((emotional* or mental* or physical*) adj2 (fatigu* or exhaust* or drain* or distress*)).mp.<br/> 7 burnout.mp.<br/> 8 (stress* adj2 (psychological or emotional or mental or professional or job or work or occupational)).mp.<br/> 9 compassion fatigue.mp.<br/> 10 (cynicism or cynical).mp.<br/> 11 or/1-10<br/> 12 INTERNSHIP PROGRAMS/ or exp CLINICAL PSYCHOLOGY INTERNSHIP/ or MEDICAL INTERNSHIP/<br/> 13 (interns or intern or internship*).mp.<br/> 14 (resident or residents or residency).mp.<br/> 15 housemanship*.mp.<br/> 16 house staff.mp.<br/> 17 housestaff.mp.<br/> 18 ((physician or doctor) adj2 training).mp.<br/> 19 (junio?r doctor* or foundation doctor* or house officer*).mp.<br/> 20 or/12-19<br/> 21 11 and 20<br/> 22 remove duplicates from 20</p> | 1477 |
| ERIC                           | <p>((resident OR residents OR residency OR intern OR internship OR interns OR housemanship* OR house staff OR housestaff OR junior doctor* OR juniour doctor* OR foundation doctor* OR house officer*)) AND noft((burnout OR exhaust* OR fatigu* OR drain* OR distress* OR depersonif* OR depersonal* OR job stress* OR psychological stress* OR emotional stress* OR mental stress* OR professional stress OR job stress OR work</p>                                                                                                                                                                                                                                                                                                                                                                                                                                                                                                                                         | 134  |

|                                         |                                                                                                                                                                                                                                                                                                                                                                                                                                                                                                                                                                                                                                                                                                                                                                                                                                                                                                                 |   |
|-----------------------------------------|-----------------------------------------------------------------------------------------------------------------------------------------------------------------------------------------------------------------------------------------------------------------------------------------------------------------------------------------------------------------------------------------------------------------------------------------------------------------------------------------------------------------------------------------------------------------------------------------------------------------------------------------------------------------------------------------------------------------------------------------------------------------------------------------------------------------------------------------------------------------------------------------------------------------|---|
|                                         | stress OR occupational stress)) AND noft((medical OR hospital OR clinical))                                                                                                                                                                                                                                                                                                                                                                                                                                                                                                                                                                                                                                                                                                                                                                                                                                     |   |
| Cochrane Database of Systematic Reviews | <ol style="list-style-type: none"> <li>1. ((emotional* or mental* or physical*) adj2 (fatigu* or exhaust* or drain* or distress*)).mp.</li> <li>2. burnout.mp.</li> <li>3. (stress* adj2 (psychological or emotional or mental or professional or job or work or occupational)).mp.</li> <li>4. (cynicism or cynical).mp.</li> <li>5. (depersonal* or depersonif*).mp.</li> <li>6. compassion fatigue.mp.</li> <li>7. or/1-6</li> <li>8. (intern or interns or internship*).mp.</li> <li>9. (resident or residents or residency).mp.</li> <li>10. housemanship*.mp.</li> <li>11. house staff.mp.</li> <li>12. housestaff.mp.</li> <li>13. ((physician or doctor) adj2 training).mp.</li> <li>14. (junio?r doctor* or foundation doctor* or house officer*).mp.</li> <li>15. or/8-14</li> <li>16. 7 and 15</li> <li>17. remove duplicates from 16</li> </ol> <p>17 not (animals/ not (humans/ and animals/))</p> | 1 |
