# Supplementary material for: Global prevalence of burnout among postgraduate medical trainees: a systematic review and meta-regression
Source: PubMed Central journal article supplement — CMAJ Open. 2021 Mar 8;9(1):E189–200. doi: 10.9778/cmajo.20200068 (PMC8034324; doi:10.9778/cmajo.20200068), 2021-03-08
Supplement: supp_9.1.E189_CMAJOpen-2020-0068-2-at.pdf [file supp_9.1.E189_CMAJOpen-2020-0068-2-at.pdf]

**Appendix 2 (as supplied by the authors):** Demographic characteristics of 118 datasets from 114 studies included in the meta-analysis

| Author                            | Country              | N PMTs | Males (%)  | Specialty                 | Year of Survey | Experiencing Burnout (%) | Tool used to Measure Burnout |
|-----------------------------------|----------------------|--------|------------|---------------------------|----------------|--------------------------|------------------------------|
| Abdulrahman(1) et al, 2018        | United Arab Emirates | 302    | 63 (21.0)  | Multiple                  | 2016           | 70.20%                   | MBI                          |
| Agha (2) et al, 2015              | Saudi Arabia         | 96     | 64 (67)    | Multiple                  | NS             | 88.54%                   | MBI                          |
| Aksoy (3) et al, 2014 [Dataset 1] | Turkey               | 28     | 10 (47)    | Pediatrics                | NS             | 27.27%                   | MBI                          |
| Aksoy (3) et al, 2014 [Dataset 2] | Turkey               | 38     | 16 (47)    | Internal Medicine         | NS             | 33.33%                   | MBI                          |
| Al-Ma'mari (4) et al, 2016        | Canada               | 143    | 19 (13.0)  | Obstetrics and Gynecology | NS             | 73.70%                   | MBI                          |
| Aldrees (5) et al, 2013           | Saudi Arabia         | 159    | NR         | Multiple                  | 2010           | 86.00%                   | MBI                          |
| Aldrees (6) et al, 2015           | Saudi Arabia         | 85     | 57 (67)    | Otolaryngology            | 2013           | 45.00%                   | MBI                          |
| Aldrees (7) et al, 2017           | Saudi Arabia         | 38     | 28 (74)    | Plastic Surgery           | 2015           | 47.00%                   | MBI                          |
| Arora (8) et al, 2014             | Australia            | 51     | NR         | Orthopedic Surgery        | 2012           | 53.00%                   | MBI                          |
| Ashkar (9) et al, 2010            | Lebanon              | 155    | 86 (55.5)  | Multiple                  | 2008           | 80.00%                   | MBI                          |
| Attenello (10) et al, 2018        | USA                  | 346    | 270 (78.0) | Neurosurgery              | 2015           | 67.00%                   | MBI                          |
| Becker (11) et al, 2006           | USA                  | 118    | 25 (20.8)  | Obstetrics and Gynecology | 2004           | 21.00%                   | MBI                          |
| Billings (12) et al, 2011         | USA                  | 284    | 131 (46.0) | Internal Medicine         | 2008 to 2010   | 45.00%                   | MBI                          |
| Blanchard (13) et al, 2010        | France               | 204    | 82 (40.0)  | Oncology                  | 2009           | 44.00%                   | MBI                          |
| Bogg (14) et al, 2001             | England              | 56     | NR         | Multiple                  | NS             | 25.00%                   | MBI                          |
| Braun (15) et al, 2017            | USA                  | 32     | 25 (79)    | Internal Medicine         | 2014           | 50.00%                   | MBI                          |
| Campbell (16) et al, 2010         | USA                  | 86     | 44 (51)    | Internal Medicine         | 2003 to 2008   | 67.00%                   | MBI                          |
| Castelo-Branco (17) et al, 2007   | Spain                | 109    | 15 (14.0)  | Obstetrics and Gynecology | 2004           | 58.00%                   | MBI                          |
| Chaput (18) et al, 2015           | France               | 52     | 26 (50)    | Plastic surgery           | 2013           | 28.80%                   | MBI                          |

Appendix to: Naji L, Singh B, Shah A, et al. Global prevalence of burnout among postgraduate medical trainees: a systematic review and meta-regression.

*CMAJ Open* 2021. DOI:10.9778/cmajo.20200068. Copyright © 2021 The Author(s) or their employer(s).

To receive this resource in an accessible format, please contact us at [cmajgroup@cmaj.ca](mailto:cmajgroup@cmaj.ca).

|                                      |              |      |             |                           |              |        |     |
|--------------------------------------|--------------|------|-------------|---------------------------|--------------|--------|-----|
| Chati (19) et al, 2017               | France       | 251  | 144 (57.5)  | General Surgery           | 2013         | 52.00% | MBI |
| Chaukos (20) et al, 2017 [Dataset 1] | USA          | 54   | 21 (40)     | Internal Medicine         | NS           | 31.00% | MBI |
| Chaukos et al, (20) 2017 [Dataset 2] | USA          | 14   | 6 (40)      | Psychiatry                | NS           | 14.00% | MBI |
| Cofer et al, (21) 2018               | USA          | 40   | 27 (68)     | General Surgery           | 2016         | 25.00% | MBI |
| Cubero et al, (22) 2016              | Brazil       | 54   | 29 (54)     | Oncology                  | 2010         | 76.00% | MBI |
| De Andrade (23) et al, 2016          | Brazil       | 32   | 7 (22)      | Pediatrics                | 2009         | 18.80% | MBI |
| Dominguez (24) et al, 2018           | Colombia     | 202  | 129 (69.3)  | NR                        | 2015         | 33.20% | MBI |
| Dyrbye et al, (25) 2014              | USA          | 1701 | 827 (48.6)  | Multiple                  | 2012         | 60.30% | MBI |
| Elmore et al, (26) 2016              | USA          | 665  | 375 (56.4)  | General Surgery           | 2014         | 69.00% | MBI |
| Embriaco et al, (27) 2007            | France       | 372  | NR          | NR                        | 2004         | 42.70% | MBI |
| Fahrenkopf et al, (28) 2008          | USA          | 123  | 37 (30.0)   | NR                        | 2003         | 75.00% | MBI |
| Galam et al, (29) 2013               | France       | 4050 | 1268 (31.3) | General Practice          | 2011         | 24.10% | MBI |
| Garza et al, (30) 2004               | USA          | 136  | 39 (29.9)   | Obstetrics and Gynecology | NR           | 18.00% | MBI |
| Goitein et al, (31) 2005             | USA          | 118  | 56 (47.5)   | Internal Medicine         | 2004         | 68.00% | MBI |
| Golub et al, (32) 2007               | USA          | 514  | 406 (79.0)  | Otolaryngology            | 2005         | 10.00% | MBI |
| Gopal et al, (33) 2005               | USA          | 121  | 58 (48.0)   | Internal Medicine         | 2003         | 61.00% | MBI |
| Gopal et al, (34) 2007               | USA          | 106  | 45 (42.5)   | Internal medicine         | 2004         | 55.00% | MBI |
| Gouveia et al, (35) 2017             | Brazil       | 129  | 62 (48.0)   | Multiple                  | 2015         | 27.90% | MBI |
| Govardhan et al, (36) 2012           | USA          | 49   | 4 (9)       | Obstetrics and Gynecology | 2009         | 13.00% | MBI |
| Goveia et al, (37) 2018              | Brazil       | 37   | NR          | Anesthesia                | 2014 to 2015 | 2.70%  | MBI |
| Hameed et al, (38) 2018              | Saudi Arabia | 181  | 75 (41.4)   | Multiple                  | 2013 to 2014 | 80.70% | MBI |
| Hill et al, (39) 2009                | USA          | 22   | NR          | Otolaryngology            | 2006         | 31.82% | MBI |
| Holmes et al, (40) 2017              | USA          | 276  | 97 (35.0)   | Multiple                  | 2014         | 69.00% | MBI |
| Jamjoom et al, (41) 2018             | Saudi Arabia | 32   | 2 (6)       | Pediatrics                | 2016         | 70.00% | MBI |

Appendix to: Naji L, Singh B, Shah A, et al. Global prevalence of burnout among postgraduate medical trainees: a systematic review and meta-regression.

*CMAJ Open* 2021. DOI:10.9778/cmajo.20200068. Copyright © 2021 The Author(s) or their employer(s).

To receive this resource in an accessible format, please contact us at [cmajgroup@cmaj.ca](mailto:cmajgroup@cmaj.ca).

|                                        |                        |     |            |                   |              |        |     |
|----------------------------------------|------------------------|-----|------------|-------------------|--------------|--------|-----|
| Joaquim et al, (42) 2018               | Portugal               | 115 | 30 (26.3)  | Oncology          | 2011         | 45.20% | MBI |
| Krug et al, (43) 2017                  | USA                    | 112 | 47 (42.0)  | Internal Medicine | 2012         | 61.00% | MBI |
| Kwah et al, (44) 2016                  | USA                    | 32  | NR         | Internal Medicine | 2012         | 75.00% | MBI |
| Landrigan et al, (45) 2008 [Dataset 1] | USA                    | 213 | 62 (29.3)  | Pediatrics        | 2003 & 2004  | 75.40% | MBI |
| Landrigan et al, (45) 2008 [Dataset 2] | USA                    | 213 | 78 (31.7)  | Pediatrics        | 2003 & 2004  | 57.00% | MBI |
| Lee et al, (46) 2018                   | Singapore              | 446 | 208 (46.6) | Multiple          | 2015         | 80.70% | MBI |
| Leung et al, (47) 2017                 | Australia, New Zealand | 107 | 53 (50.0)  | Oncology          | 2015         | 49.50% | MBI |
| Levin et al, (48) 2017                 | USA                    | 354 | 182 (51.4) | Neurology         | 2016         | 67.20% | MBI |
| Lin et al, (49) 2016                   | USA                    | 73  | 42 (58)    | General Surgery   | 2013 to 2014 | 82.00% | MBI |
| Lindeman et al (50) , 2013 [Dataset 1] | USA                    | 30  | 21 (70)    | General Surgery   | 2011         | 93.00% | MBI |
| Lindeman et al, (50) 2013 [Dataset 2]  | USA                    | 36  | 24 (67)    | General Surgery   | 2012         | 75.00% | MBI |
| Lindeman et al, (51) 2017              | USA                    | 88  | 46 (52)    | General Surgery   | 2016         | 51.00% | MBI |
| Llera et al, (52) 2014                 | Argentina              | 92  | 28 (30)    | Multiple          | 2011         | 19.60% | MBI |
| Malik et al, (53) 2016                 | Pakistan               | 133 | 98 (73.7)  | Multiple          | NS           | 57.90% | MBI |
| Martini et al, (54) 2004               | USA                    | 110 | NR         | Multiple          | 2003         | 49.00% | MBI |
| Martini et al, (55) 2006               | USA                    | 118 | NR         | Multiple          | 2004         | 41.00% | MBI |
| Mohammed et al, (56) 2014              | Egypt                  | 84  | 46 (55)    | Multiple          | 2012         | 76.00% | MBI |
| Msaouel et al, (57) 2010               | Greece                 | 311 | 172 (55.3) | Multiple          | NR           | 49.50% | MBI |
| Nolan et al, (58) 2017                 | Canada                 | 166 | 43 (26.0)  | Pediatrics        | 2014         | 42.00% | MBI |
| O'Connor et al, (59) 2017              | Ireland                | 172 | 75 (43.6)  | Multiple          | 2015         | 69.50% | MBI |
| Olson et al, (60) 2014                 | USA                    | 76  | 40 (53)    | Internal Medicine | 2012         | 53.90% | MBI |
| Olson et al, (61) 2015                 | USA                    | 45  | 16 (36)    | Pediatrics        | 2014         | 40.00% | MBI |
| Pantaleoni et al, (62) 2014            | USA                    | 61  | NR         | Pediatrics        | 2011         | 46.00% | MBI |
| Ramey et al, (63) 2017                 | USA                    | 205 | 141 (68.8) | Oncology          | 2016         | 33.20% | MBI |

Appendix to: Naji L, Singh B, Shah A, et al. Global prevalence of burnout among postgraduate medical trainees: a systematic review and meta-regression.

*CMAJ Open* 2021. DOI:10.9778/cmajo.20200068. Copyright © 2021 The Author(s) or their employer(s).

To receive this resource in an accessible format, please contact us at [cmajgroup@cmaj.ca](mailto:cmajgroup@cmaj.ca).

|                                   |           |      |            |                    |              |        |                              |
|-----------------------------------|-----------|------|------------|--------------------|--------------|--------|------------------------------|
| Ripp et al, (64) 2010             | USA       | 145  | 73 (50.3)  | Internal Medicine  | 2007         | 34.00% | MBI                          |
| Ripp et al, (65) 2011             | USA       | 191  | 126 (66.0) | Internal Medicine  | 2009         | 81.00% | MBI                          |
| Ripp et al, (66) 2015             | USA       | 133  | 77 (58.0)  | Internal Medicine  | 2012         | 75.00% | MBI                          |
| Rosen et al, (67) 2006            | USA       | 47   | 23 (49)    | Internal Medicine  | 2003         | 55.30% | MBI                          |
| Sajjadi et al, (68) 2017          | Canada    | 43   | 19 (45)    | IM                 | 2014         | 21.00% | MBI                          |
| Sargent et al, (69) 2009          | USA       | 384  | 338 (88.0) | Orthopedic Surgery | NR           | 56.00% | MBI                          |
| Shanafelt et al, (70) 2002        | USA       | 115  | 54 (47.0)  | Internal Medicine  | 2001         | 76.00% | MBI                          |
| Siu et al, (71) 2012              | Hong Kong | 77   | NR         | NR                 | 2009         | 48.00% | MBI                          |
| Spataro et al (72) , 2016         | USA       | 198  | 102 (51.0) | Internal Medicine  | 2014         | 22.00% | MBI                          |
| Sulaiman et al, (73) 2017         | Ireland   | 265  | 140 (52.8) | Multiple           | NS           | 26.40% | MBI                          |
| Toral-Villanueva (74) et al, 2009 | Mexico    | 312  | 177 (57.0) | Multiple           | 2003         | 40.00% | MBI                          |
| Waldman (75) et al, 2009          | Argentina | 106  | 70 (66.0)  | Cardiology         | 2007         | 80.20% | MBI                          |
| Willcock (76) et al, 2004         | Australia | 110  | 70 (56.0)  | Psychiatry         | 2001         | 54.00% | MBI                          |
| Williford (77) et al, 2018        | USA       | 76   | NR         | General Surgery    | 2017         | 75.00% | MBI                          |
| Zis et al, (78) 2014              | Greece    | 263  | 141 (53.6) | Multiple           | 2012         | 14.40% | MBI                          |
| Zis et al, (79) 2015              | Greece    | 116  | 52 (44.8)  | Neurology          | 2014         | 18.10% | MBI                          |
| Talih et al, (80) 2016            | Lebanon   | 118  | 62 (53.0)  | Multiple           | 2013         | 27.00% | Burnout Measure (modified)   |
| Pereira-Lima (81) et al, 2015     | Brazil    | 305  | 159 (52.1) | Multiple           | NR           | 58.36% | Burnout Syndrome Inventory   |
| See et al, (82) 2016              | Singapore | 64   | NR         | Internal Medicine  | 2013         | 71.80% | Copenhagen Burnout Inventory |
| Jovanovic et al, (83) 2016        | Europe    | 1980 | 804 (40.6) | Psychiatry         | 2008 to 2012 | 36.70% | MBI-GS                       |
| Miyoshi et al, (84) 2016          | Japan     | 85   | 47 (55)    | NR                 | 2013         | 30.59% | MBI-GS                       |
| Torppa et al, (85) 2015           | Finland   | 97   | NR         | General Practice   | 2011         | 16.50% | Modified MBI (1 item)        |
| De Oliveira Jr (86) et al, 2013   | USA       | 1417 | 808 (57.0) | Anesthesia         | NR           | 41.00% | Modified MBI (12 questions)  |

Appendix to: Naji L, Singh B, Shah A, et al. Global prevalence of burnout among postgraduate medical trainees: a systematic review and meta-regression.

*CMAJ Open* 2021. DOI:10.9778/cmajo.20200068. Copyright © 2021 The Author(s) or their employer(s).

To receive this resource in an accessible format, please contact us at [cmajgroup@cmaj.ca](mailto:cmajgroup@cmaj.ca).

|                              |                                                                                                                                                                                                                                                                |      |            |            |      |        |                                                       |
|------------------------------|----------------------------------------------------------------------------------------------------------------------------------------------------------------------------------------------------------------------------------------------------------------|------|------------|------------|------|--------|-------------------------------------------------------|
| Ruitenburng et al, (87) 2012 | Netherlands                                                                                                                                                                                                                                                    | 181  | 76 (42.0)  | Multiple   | 2009 | 7.00%  | Modified MBI (13 items)                               |
| Ringrose et al, (88) 2009    | Netherlands                                                                                                                                                                                                                                                    | 47   | 23 (49)    | Multiple   | 2007 | 31.00% | Modified MBI (15 items)                               |
| McNeeley et al, (89) 2013    | USA                                                                                                                                                                                                                                                            | 249  | 182 (73.0) | Radiology  | 2012 | 62.00% | Modified MBI (2 Single Item Measures, & PA (5 items)) |
| Porrino et al,(90) 2017      | USA                                                                                                                                                                                                                                                            | 58   | 48 (83)    | Radiology  | 2016 | 87.90% | Modified MBI (2 Single Item Measures, & PA (5 items)) |
| Baer et al, (91) 2017        | USA                                                                                                                                                                                                                                                            | 258  | 54 (21.1)  | Pediatrics | 2013 | 39.10% | Modified MBI (2-Single Item Measures of EE and DP)    |
| Mordant et al,(92) 2014      | Italy (n=34), Netherlands (n=22), France (n=22), Belgium (n=17), UK (n=14), Austria (n=7), Portugal (n=5), Poland (n=4), Spain (n=4), Slovenia (n=4), Germany (n=3), Lithuania (n=3), Greece (n=2), Ukraine (n=2), Ireland (n=2), Bulgaria (n=2), Other (n=22) | 155  | 103 (66.5) | Multiple   | 2010 | 24.80% | Modified MBI (2-Single Item Measures of EE and DP)    |
| Shanafelt et al, (93) 2014   | USA                                                                                                                                                                                                                                                            | 1345 | 710 (52.8) | Oncology   | 2014 | 34.10% | Modified MBI (2-Single Item)                          |

Appendix to: Naji L, Singh B, Shah A, et al. Global prevalence of burnout among postgraduate medical trainees: a systematic review and meta-regression.

*CMAJ Open* 2021. DOI:10.9778/cmajo.20200068. Copyright © 2021 The Author(s) or their employer(s).

To receive this resource in an accessible format, please contact us at [cmajgroup@cmaj.ca](mailto:cmajgroup@cmaj.ca).

|                                |                 |      |            |                    |      |        |                                                    |
|--------------------------------|-----------------|------|------------|--------------------|------|--------|----------------------------------------------------|
|                                |                 |      |            |                    |      |        | Measures of EE and DP)                             |
| Simpkin et al, (94) 2018       | US and Canada   | 49   | 15 (30)    | Pediatrics         | 2015 | 31.00% | Modified MBI (2-Single Item Measures of EE and DP) |
| Trockel et al,(95) 2018        | USA             | 185  | NR         | Multiple           | NS   | 50.00% | Modified MBI (2-Single Item Measures of EE and DP) |
| van Vendelo (96) et al, 2014   | Netherlands     | 105  | 83 (79.0)  | Orthopedic Surgery | 2011 | 27.60% | Modified MBI (2-Single Item Measures of EE and DP) |
| Prins et al, (97) 2007         | The Netherlands | 158  | 76 (48.0)  | Multiple           | 2003 | 13.00% | Modified MBI (20 items)                            |
| Prins et al,(98) 2010          | The Netherlands | 2115 | 820 (38.8) | Multiple           | 2005 | 21.00% | Modified MBI (20 items)                            |
| van der Wal et al, (99) 2016   | Netherlands     | 141  | 53 (37.6)  | Anesthesia         | 2012 | 11.30% | Modified MBI (20 items)                            |
| van Vendeloo et al, (100) 2018 | Netherlands     | 1231 | 325 (26.4) | Multiple           | 2015 | 15.00% | Modified MBI (20 items)                            |
| van Vendeloo et al,(101) 2018  | Belgium         | 236  | 96 (40.7)  | Multiple           | 2016 | 41.50% | Modified MBI (20 items)                            |
| Block et al, (102) 2013        | USA             | 55   | 29 (53)    | Internal Medicine  | 2011 | 76.00% | Modified MBI (6 items)                             |
| Lebares et al,(103) 2018       | USA             | 566  | 277 (49.0) | General Surgery    | 2016 | 68.95% | Modified MBI (9 items)                             |
| Shakir et al, (104) 2017       | USA             | 255  | 205 (80.4) | Neurosurgery       | 2016 | 36.50% | Modified MBI (9 items)                             |
| Huggard et al, (105) 2011      | New Zealand     | 253  | 104 (41.1) | Multiple           | NR   | 19.50% | Professional Quality of Life Index Version 3       |
| Low et al, (106) 2018          | Singapore       | 43   | 18 (43)    | Multiple           | 2015 | 34.88% | Professional Quality of Life Scale                 |

Appendix to: Naji L, Singh B, Shah A, et al. Global prevalence of burnout among postgraduate medical trainees: a systematic review and meta-regression.

*CMAJ Open* 2021. DOI:10.9778/cmajo.20200068. Copyright © 2021 The Author(s) or their employer(s).

To receive this resource in an accessible format, please contact us at [cmajgroup@cmaj.ca](mailto:cmajgroup@cmaj.ca).

|                            |                        |     |            |                  |      |        |                                    |
|----------------------------|------------------------|-----|------------|------------------|------|--------|------------------------------------|
| Markwell et al, (107) 2009 | Australia, New Zealand | 914 | 402 (44.0) | Multiple         | 2008 | 69.00% | Professional Quality of Life Scale |
| Cooke et al, (108) 2013    | Australia              | 128 | NR         | General Practice | 2010 | 14.00% | Single item measure                |
| Kealy et al, (109) 2016    | Canada                 | 400 | 123 (30.8) | Psychiatry       | 2014 | 21.00% | Single item measure                |
| Lambden et al, (110) 2018  | USA                    | 72  | NR         | Multiple         | 2017 | 53.50% | Single item measure                |
| Leach et al, (111) 2018    | USA                    | 43  | 27 (63)    | General Surgery  | 2017 | 30.20% | Single item measure                |
| Raviola et al, (112) 2002  | Kenya                  | 50  | NR         | Multiple         | NS   | 82.00% | Single item measure                |
| Robertson et al,(113) 2017 | USA                    | 340 | 143 (42.0) | Multiple         | 2015 | 34.00% | Single item measure                |
| Schweitzer, (114)1994      | South Africa           | 36  | NR         | NR               | NR   | 55.50% | Single item measure                |

## REFERENCES

1. Abdulrahman M, Farooq MM, Al Kharmiri A, Al Marzooqi F, Carrick FR. Burnout and depression among medical residents in the United Arab Emirates: A Multicenter study. *J Fam Med Prim care*. 2018;7(2 PG-435-441):435–41.
2. Agha A, Mordya A, Anwar E, Saleh N, Rashid I, Saeed M. Burnout among middle-grade doctors of tertiary care hospital in Saudi Arabia. *Work J Prev Assess Rehabil*. 2015;51(4 PG-839-847):839–47.
3. Aksoy DY, Durusu Tanriover M, Dizdar O, Kalyoncu U, Karakaya J, Unal S, et al. Burnout syndrome during residency in internal medicine and pediatrics in a country without working time directive. *Int J Health Care Qual Assur*. 2014;27(3 PG-223-230):223–30.
4. Al-Ma'mari NO, Naimi AI, Tulandi T. Prevalence and predictors of burnout among obstetrics and gynecology residents in Canada. *Gynecol Surg*. 2016;13(4 PG-323-327):323–7.
5. Aldrees TM, Aleissa S, Zamakhshary M, Badri M, Sadat-Ali M. Physician well-being: Prevalence of burnout and associated risk factors in a tertiary hospital, Riyadh, Saudi Arabia. *Ann Saudi Med*. 2013;33(5 PG-451-456):451–6.
6. Aldrees T, Badri M, Islam T, Alqahtani K. Burnout among otolaryngology residents in Saudi Arabia: A multicenter study. *J Surg Educ*. 2015;72(5 PG-844-848):844–8.
7. Aldrees T, Hassouneh B, Alabdulkarim A, Asad L, Alqaryan S, Aljohani E, et al. Burnout among plastic surgery residents:

Appendix to: Naji L, Singh B, Shah A, et al. Global prevalence of burnout among postgraduate medical trainees: a systematic review and meta-regression.

*CMAJ Open* 2021. DOI:10.9778/cmajo.20200068. Copyright © 2021 The Author(s) or their employer(s).

To receive this resource in an accessible format, please contact us at [cmajgroup@cmaj.ca](mailto:cmajgroup@cmaj.ca).

- National survey in Saudi Arabia. *Saudi Med J*. 2017;38(8 PG-832-836):832–6.
8. Arora M, Diwan AD, Harris IA. Prevalence and factors of burnout among Australian orthopaedic trainees: a cross-sectional study. *J Orthop Surg (Hong Kong)*. 2014;22(3 PG-374-7):374–7.
  9. Ashkar K, Romani M, Musharrafieh U, Chaaya M. Prevalence of burnout syndrome among medical residents: experience of a developing country. *Postgrad Med J*. 2010;86(1015 PG-266-71):266–71.
  10. Attenello FJ, Buchanan IA, Wen T, Donoho DA, McCartney S, Cen SY, et al. Factors associated with burnout among US neurosurgery residents: a nationwide survey. *J Neurosurg*. 2018;(PG-1-15):1–15.
  11. Becker JL, Milad MP, Klock SC. Burnout, depression, and career satisfaction: Cross-sectional study of obstetrics and gynecology residents. *Am J Obstet Gynecol*. 2006;195(5 PG-1444-1449):1444–9.
  12. Billings ME, Lazarus ME, Wenrich M, Curtis JR, Engelberg RA. The effect of the hidden curriculum on resident burnout and cynicism. *J Grad Med Educ*. 2011;3(4 PG-503-10):503–10.
  13. Blanchard P, Truchot D, Albiges-Sauvin L, Dewas S, Pointreau Y, Rodrigues M, et al. Prevalence and causes of burnout amongst oncology residents: a comprehensive nationwide cross-sectional study. *Eur J Cancer*. 2010;46(15 PG-2708-15):2708–15.
  14. Bogg J, Gibbs T, Bundred P. Training, job demands and mental health of pre-registration house officers. *Med Educ*. 2001;35(6 PG-590-5):590–5.
  15. Braun SE, Auerbach SM, Rybarczyk B, Lee B, Call S. Mindfulness, burnout, and effects on performance evaluations in internal medicine residents. *Adv Med Educ Pract*. 2017;8(PG-591-597):591–7.
  16. Campbell J, Prochazka A V, Yamashita T, Gopal R. Predictors of persistent burnout in internal medicine residents: a prospective cohort study. *Acad Med*. 2010;85(10 PG-1630-4):1630–4.
  17. Castelo-Branco C, Figueras F, Eixarch E, Quereda F, Cancelo MJ, Gonzalez S, et al. Stress symptoms and burnout in obstetric and gynaecology residents. *BJOG An Int J Obstet Gynaecol*. 2007;114(1 PG-94-98):94–8.
  18. Chaput B, Bertheuil N, Jacques J, Smilevitch D, Bekara F, Soler P, et al. Professional Burnout Among Plastic Surgery Residents: Can it be Prevented? Outcomes of a National Survey. *Ann Plast Surg*. 2015;75(1 PG-2-8):2–8.
  19. Chati R, Huet E, Grimberg L, Schwarz L, Tuech J-J, Bridoux V. Factors associated With burnout among French digestive surgeons in training: results of a national survey on 328 residents and fellows. *Am J Surg*. 2017;213(4 PG-754-762):754–62.
  20. Chaukos D, Chad-Friedman E, Mehta DH, Byerly L, Celik A, McCoy TH, et al. Risk and Resilience Factors Associated with Resident Burnout. *Acad Psychiatry*. 2017;41(2 PG-189-194):189–94.
  21. Cofer KD, Hollis RH, Goss L, Morris MS, Porterfield JR, Chu DI. Burnout is Associated With Emotional Intelligence but not Traditional Job Performance Measurements in Surgical Residents. *J Surg Educ*. 2018;(PG-).
  22. Cubero DIG, Fumis RRL, de Sa TH, Dettino A, Costa FO, Van Eyll BMRHA, et al. “Burnout in Medical Oncology Fellows: a

Appendix to: Naji L, Singh B, Shah A, et al. Global prevalence of burnout among postgraduate medical trainees: a systematic review and meta-regression.

*CMAJ Open* 2021. DOI:10.9778/cmajo.20200068. Copyright © 2021 The Author(s) or their employer(s).

To receive this resource in an accessible format, please contact us at [cmajgroup@cmaj.ca](mailto:cmajgroup@cmaj.ca).



- Prospective Multicenter Cohort Study in Brazilian Institutions.” *J Cancer Educ.* 2016;31(3 PG-582-7):582–7.
23. De Andrade APM, Amaro E, Farhat SCL, Schwartsman C. Higher burnout scores in paediatric residents are associated with increased brain activity during attentional functional magnetic resonance imaging task. *Acta Paediatr Int J Paediatr.* 2016;105(6 PG-705-713):705–13.
  24. Dominguez LC, Stassen L, de Grave W, Sanabria A, Alfonso E, Dolmans D. Taking control: Is job crafting related to the intention to leave surgical training? *PLoS One.* 2018;13(6 PG-e0197276):e0197276.
  25. Dyrbye LN, West CP, Satele D, Boone S, Tan L, Sloan J, et al. Burnout among u.s. medical students, residents, and early career physicians relative to the general u.s. population. *Acad Med.* 2014;89(3 PG-443-451):443–51
  26. Elmore LC, Jeffe DB, Jin L, Awad MM, Turnbull IR. National Survey of Burnout among US General Surgery Residents. *J Am Coll Surg.* 2016;223(3 PG-440-451):440–51.
  27. Embriaco N, Azoulay E, Barrau K, Kentish N, Pochard F, Loundou A, et al. High level of burnout in intensivists: Prevalence and associated factors. *Am J Respir Crit Care Med.* 2007;175(7 PG-686-692):686–92.
  28. Fahrenkopf AM, Sectish TC, Barger LK, Sharek PJ, Lewin D, Chiang VW, et al. Rates of medication errors among depressed and burnt out residents: Prospective cohort study. *BMJ.* 2008;336(7642 PG-488-491):488–91.
  29. Galam E, Komly V, Le Tourneur A, Jund J. Burnout among French GPs in training: A cross-sectional study. *Br J Gen Pract.* 2013;63(608 PG-e217-e224):e217–24.
  30. Garza JA, Schneider KM, Promecene P, Monga M. Burnout in residency: Statewide study. *South Med J.* 2004;97(12 PG-1171-1173):1171–3.
  31. Goitein L, Shanafelt TD, Wipf JE, Slatore CG, Back AL. The effects of work-hour limitations on resident well-being, patient care, and education in an internal medicine residency program. *Arch Intern Med.* 2005;165(22 PG-2601-2606):2601–6.
  32. Golub JS, Weiss PS, Ramesh AK, Ossoff RH, Johns 3rd MM. Burnout in residents of otolaryngology-head and neck surgery: a national inquiry into the health of residency training. *Acad Med.* 2007;82(6 PG-596-601):596–601.
  33. Gopal R, Glasheen JJ, Miyoshi TJ, Prochazka A V. Burnout and internal medicine resident work-hour restrictions. *Arch Intern Med.* 2005;165(22 PG-2595-2600):2595–600.
  34. Gopal RK, Carreira F, Baker WA, Glasheen JJ, Crane LA, Miyoshi TJ, et al. Internal Medicine Residents Reject “Longer and Gentler” Training. *J Gen Intern Med.* 2007 Jan;22(1):102–6.
  35. Gouveia PA da C, Ribeiro MHCN, Aschoff CA de M, Gomes DP, Silva NAF da, Cavalcanti HAF. Factors associated with burnout syndrome in medical residents of a university hospital. *Rev Assoc Med Bras.* 2017;63(6 PG-504-511):504–11.
  36. Govardhan LM, Pinelli V, Schnatz PF. Burnout, depression and job satisfaction in obstetrics and gynecology residents. *Conn Med.* 2012;76(7 PG-389-95):389–95
  37. Goveia CS, Cruz TTMD, de Miranda DB, Guimaraes GMN, Ladeira LCA, Tolentino FDS, et al. Association between burnout

Appendix to: Naji L, Singh B, Shah A, et al. Global prevalence of burnout among postgraduate medical trainees: a systematic review and meta-regression.

*CMAJ Open* 2021. DOI:10.9778/cmajo.20200068. Copyright © 2021 The Author(s) or their employer(s).

To receive this resource in an accessible format, please contact us at [cmajgroup@cmaj.ca](mailto:cmajgroup@cmaj.ca).

- syndrome and anxiety in residents and anesthesiologists of the Federal District. *Brazilian J Anesthesiol.* 2018;(PG-).
38. Hameed TK, Masuadi E, Al Asmary NA, Al-Anzi FG, Al Dubayee MS. A study of resident duty hours and burnout in a sample of Saudi residents. *BMC Med Educ.* 2018;18(1 PG-180):180.
  39. Hill JD, Smith RJH. Monitoring stress levels in postgraduate medical training. *Laryngoscope.* 2009;119(1 PG-75-8):75–8.
  40. Holmes EG, Connolly A, Putnam KT, Penaskovic KM, Denniston CR, Clark LH, et al. Taking Care of Our Own: A Multispecialty Study of Resident and Program Director Perspectives on Contributors to Burnout and Potential Interventions. *Acad Psychiatry.* 2017;41(2 PG-159-166):159–66.
  41. Jamjoom RS, Park YS. Assessment of pediatric residents burnout in a tertiary academic centre. *Saudi Med J.* 2018;39(3 PG-296-300):296–300.
  42. Joaquim A, Custodio S, Savva-Bordalo J, Chacim S, Carvalhais I, Lombo L, et al. Burnout and occupational stress in the medical residents of Oncology, Haematology and Radiotherapy: a prevalence and predictors study in Portugal. *Psychol Health Med.* 2018;23(3 PG-317-324):317–24.
  43. Krug MF, Golob AL, Wander PL, Wipf JE. Changes in Resident Well-Being at One Institution Across a Decade of Progressive Work Hours Limitations. *Acad Med.* 2017;92(10 PG-1480-1484):1480–4.
  44. Kwah J, Weintraub J, Fallar R, Ripp J. The Effect of Burnout on Medical Errors and Professionalism in First-Year Internal Medicine Residents. *J Grad Med Educ.* 2016;8(4 PG-597-600):597–600.
  45. Landrigan CP, Fahrenkopf AM, Lewin D, Sharek PJ, Barger LK, Eisner M, et al. Effects of the Accreditation Council for Graduate Medical Education Duty Hour Limits on Sleep, Work Hours, and Safety. *Pediatrics.* 2008 Aug;122(2):250–8.
  46. Lee PT, Loh J, Sng G, Tung J, Yeo KK. Empathy and burnout: A study on residents from a Singapore institution. *Singapore Med J.* 2018;59(1 PG-50-54):50–4.
  47. Leung J, Rioseco P. Burnout, stress and satisfaction among Australian and New Zealand radiation oncology trainees. *J Med Imaging Radiat Oncol.* 2017;61(1 PG-146-155):146–55.
  48. Levin KH, Shanafelt TD, Keran CM, Busis NA, Foster LA, Molano JR V, et al. Burnout, career satisfaction, and well-being among US neurology residents and fellows in 2016. *Neurology.* 2017;89(5 PG-492-501):492–501.
  49. Lin DT, Liebert CA, Tran J, Lau JN, Salles A. Emotional Intelligence as a Predictor of Resident Well-Being. *J Am Coll Surg.* 2016;223(2 PG-352-358):352–8.
  50. Lindeman BM, Sacks BC, Hirose K, Lipsett PA. Multifaceted longitudinal study of surgical resident education, quality of life, and patient care before and after July 2011. *J Surg Educ.* 2013;70(6 PG-769-776):769–76.
  51. Lindeman B, Petrusa E, McKinley S, Hashimoto DA, Gee D, Smink DS, et al. Association of Burnout With Emotional Intelligence and Personality in Surgical Residents: Can We Predict Who Is Most at Risk? *J Surg Educ.* 2017;74(6 PG-e22-e30):e22–30.

Appendix to: Naji L, Singh B, Shah A, et al. Global prevalence of burnout among postgraduate medical trainees: a systematic review and meta-regression.

*CMAJ Open* 2021. DOI:10.9778/cmajo.20200068. Copyright © 2021 The Author(s) or their employer(s).

To receive this resource in an accessible format, please contact us at [cmajgroup@cmaj.ca](mailto:cmajgroup@cmaj.ca).

52. Llera J, Durante E. Correlation between the educational environment and burn-out syndrome in residency programs at a university hospital. *Arch Argent Pediatr*. 2014;112(1 PG-6-11):6–11.
53. Malik AA, Bhatti S, Shafiq A, Khan RS, Butt UI, Bilal SM, et al. Burnout among surgical residents in a lower-middle income country - Are we any different? *Ann Med Surg*. 2016;9(PG-28-32):28–32.
54. Martini S, Arfken CL, Churchill A, Balon R. Burnout comparison among residents in different medical specialties. *Acad Psychiatry*. 2004;28(3 PG-240-242):240–2.
55. Martini S, Arfken CL, Balon R. Comparison of Burnout Among Medical Residents Before and After the Implementation of Work Hours Limits. *Acad Psychiatry*. 2006 Aug;30(4):352–5.
56. Mohammed KA-M, Ali EG, Youssef IM, Fahmy MT, Haggag WE. Depression and burnout among residents. *Arab J Psychiatry*. 2014;25(1 PG-40-51):40–51.
57. Msaouel P, Keramaris NC, Tasoulis A, Kolokythas D, Syrmos N, Pararas N, et al. Burnout and training satisfaction of medical residents in Greece: will the European Work Time Directive make a difference? *Hum Resour Health*. 2010;8(PG-16):16.
58. Nolan KJ, Writer H, Ladhani M. Wellness in Canadian paediatric residents and their program directors. *Paediatr Child Heal*. 2017;22(4 PG-199-202):199–202.
59. O'Connor P, Lydon S, O'Dea A, Hehir L, Offiah G, Vellinga A, et al. A longitudinal and multicentre study of burnout and error in Irish junior doctors. *Postgrad Med J*. 2017;93(1105 PG-660-664):660–4.
60. Olson SM, Odo NU, Duran AM, Pereira AG, Mandel JH. Burnout and Physical Activity in Minnesota Internal Medicine Resident Physicians. *J Grad Med Educ*. 2014;6(4 PG-669-74):669–74.
61. Olson K, Kemper KJ, Mahan JD. What factors promote resilience and protect against burnout in first-year pediatric and medicine-pediatric residents? *J Evid Based Complementary Altern Med*. 2015;20(3 PG-192-198):192–8.
62. Pantaleoni JL, Augustine EM, Sourkes BM, Bachrach LK. Burnout in pediatric residents over a 2-year period: A longitudinal study. *Acad Pediatr*. 2014;14(2 PG-167-172):167–72.
63. Ramey SJ, Ahmed AA, Takita C, Wilson LD, Thomas CR, Yechieli R. Burnout Evaluation of Radiation Residents Nationwide: Results of a Survey of United States Residents. *Int J Radiat Oncol Biol Phys*. 2017;99(3 PG-530-538):530–8.
64. Ripp J, Fallar R, Babyatsky M, David R, Reich L, Korenstein D. Prevalence of resident burnout at the start of training. *Teach Learn Med*. 2010;22(3 PG-172-5):172–5.
65. Ripp J, Babyatsky M, Fallar R, Bazari H, Bellini L, Kapadia C, et al. The incidence and predictors of job burnout in first-year internal medicine residents: a five-institution study. *Acad Med*. 2011;86(10 PG-1304-10):1304–10.
66. Ripp JA, Bellini L, Fallar R, Bazari H, Katz JT, Korenstein D. The impact of duty hours restrictions on job burnout in internal medicine residents: a three-institution comparison study. *Acad Med*. 2015;90(4 PG-494-499):494–9.
67. Rosen IM, Gimotty PA, Shea JA, Bellini LM. Evolution of sleep quantity, sleep deprivation, mood disturbances, empathy, and

Appendix to: Naji L, Singh B, Shah A, et al. Global prevalence of burnout among postgraduate medical trainees: a systematic review and meta-regression.

*CMAJ Open* 2021. DOI:10.9778/cmajo.20200068. Copyright © 2021 The Author(s) or their employer(s).

To receive this resource in an accessible format, please contact us at [cmajgroup@cmaj.ca](mailto:cmajgroup@cmaj.ca).

- burnout among interns. *Acad Med*. 2006;81(1 PG-82-85):82–5.
68. Sajjadi S, Norena M, Wong H, Dodek P. Moral distress and burnout in internal medicine residents. *Can Med Educ J*. 2017;8(1 PG-e36-e43):e36–43.
  69. Sargent MC, Sotile W, Sotile MO, Rubash H, Barrack RL. Quality of life during orthopaedic training and academic practice. Part 1: Orthopaedic surgery residents and faculty. *J Bone Jt Surg - Ser A*. 2009;91(10 PG-2395-2405):2395–405.
  70. Shanafelt TD, Bradley KA, Wipf JE, Back AL. Burnout and self-reported patient care in an internal medicine residency program. *Ann Intern Med*. 2002;136(5 PG-358-367):358–67.
  71. Siu CFY, Yuen SK, Cheung A. Burnout among public doctors in Hong Kong: cross-sectional survey. *Hong Kong Med J*. 2012;18(3 PG-186-192):186–92.
  72. Spataro BM, Tilstra SA, Rubio DM, McNeil MA. The Toxicity of Self-Blame: Sex Differences in Burnout and Coping in Internal Medicine Trainees. *J Women’s Heal*. 2016;25(11 PG-1147-1152):1147–52.
  73. Sulaiman CFC, Henn P, Smith S, O’Tuathaigh CMP. Burnout syndrome among non-consultant hospital doctors in Ireland: relationship with self-reported patient care. *Int J Qual Heal care J Int Soc Qual Heal Care*. 2017;29(5 PG-679-684):679–84.
  74. Toral-Villanueva R, Aguilar-Madrid G, Juarez-Perez CA. Burnout and patient care in junior doctors in Mexico City. *Occup Med (Lond)*. 2009;59(1 PG-8-13):8–13.
  75. Waldman S V, Lopez Diez JC, Arazi HC, Linetzky B, Guinjoan S, Grancelli H. Burnout, perceived stress, and depression among cardiology residents in Argentina. *Acad Psychiatry*. 2009;33(4 PG-296-301):296–301.
  76. Willcock SM, Daly MG, Tennant CC, Allard BJ. Burnout and psychiatric morbidity in new medical graduates. *Med J Aust*. 2004;181(7 PG-357-360):357–60.
  77. Williford ML, Scarlet S, Meyers MO, Lockett DJ, Fine JP, Goettler CE, et al. Multiple-Institution Comparison of Resident and Faculty Perceptions of Burnout and Depression During Surgical Training. *JAMA Surg*. 2018;(PG-)
  78. Zis P, Anagnostopoulos F, Sykioti P. Burnout in medical residents: A study based on the job demands-resources model. *Sci World J*. 2014;2014(PG-673279):673279.
  79. Zis P, Artemiadis AK, Lykouri M, Xirou S, Roussopoulou A, Papageorgiou E, et al. Residency Training: Determinants of burnout of neurology trainees in Attica, Greece. *Neurology*. 2015;85(11 PG-e81-e84):e81–4.
  80. Talih F, Warakian R, Ajaltouni J, Shehab AA, Tamim H. Correlates of Depression and Burnout Among Residents in a Lebanese Academic Medical Center: a Cross-Sectional Study. *Acad Psychiatry*. 2016;40(1 PG-38-45):38–45.
  81. Pereira-Lima K, Loureiro SR. Burnout, anxiety, depression, and social skills in medical residents. *Psychol Health Med*. 2015;20(3 PG-353-362):353–62.
  82. See KC, Lim TK, Kua EH, Phua J, Chua GS, Ho KY. Stress and Burnout among Physicians: Prevalence and Risk Factors in a Singaporean Internal Medicine Programme. *Ann Acad Med Singapore*. 2016;45(10 PG-471-474):471–4.

Appendix to: Naji L, Singh B, Shah A, et al. Global prevalence of burnout among postgraduate medical trainees: a systematic review and meta-regression.

*CMAJ Open* 2021. DOI:10.9778/cmajo.20200068. Copyright © 2021 The Author(s) or their employer(s).

To receive this resource in an accessible format, please contact us at [cmajgroup@cmaj.ca](mailto:cmajgroup@cmaj.ca).

83. Jovanovic N, Podlesek A, Volpe U, Barrett E, Ferrari S, Kuzman MR, et al. Burnout syndrome among psychiatric trainees in 22 countries: Risk increased by long working hours, lack of supervision, and psychiatry not being first career choice. *Eur Psychiatry*. 2016;32(PG-34-41):34–41.
84. Miyoshi R, Matsuo H, Takeda R, Komatsu H, Abe H, Ishida Y. Burnout in Japanese residents and its associations with temperament and character. *Asian J Psychiatr*. 2016;24(PG-5-9):5–9.
85. Torppa MA, Kuikka L, Nevalainen M, Pitkala KH. Emotionally exhausting factors in general practitioners' work. *Scand J Prim Health Care*. 2015;33(3 PG-178-183):178–83.
86. De Oliveira Jr GS, Chang R, Fitzgerald PC, Almeida MD, Castro-Alves LS, Ahmad S, et al. The prevalence of burnout and depression and their association with adherence to safety and practice standards: A survey of united states anesthesiology trainees. *Anesth Analg*. 2013;117(1 PG-182-193):182–93.
87. Ruitenburt MM, Frings-Dresen MH, Sluiter JK. The prevalence of common mental disorders among hospital physicians and their association with self-reported work ability: a cross-sectional study. *BMC Health Serv Res*. 2012 Dec;12(1):292.
88. Ringrose R, Houterman S, Koops W, Oei G. Burnout in medical residents: A questionnaire and interview study. *Psychol Heal Med*. 2009;14(4 PG-476-486):476–86.
89. McNeeley MF, Perez FA, Chew FS. The emotional wellness of radiology trainees: Prevalence and predictors of burnout. *Acad Radiol*. 2013;20(5 PG-647-655):647–55.
90. Porrino J, Mulcahy MJ, Mulcahy H, Relyea-Chew A, Chew FS. Emotional Wellness of Current Musculoskeletal Radiology Fellows. *Acad Radiol*. 2017;24(6 PG-682-693):682–93.
91. Baer TE, Feraco AM, Tuysuzoglu Sagalowsky S, Williams D, Litman HJ, Vinci RJ. Pediatric Resident Burnout and Attitudes Toward Patients. *Pediatrics*. 2017;139(3 PG-).
92. Mordant P, Deneuve S, Rivera C, Carrabin N, Mieog JS, Malyshev N, et al. Quality of Life of Surgical Oncology Residents and Fellows Across Europe. *J Surg Educ*. 2014;71(2 PG-222-228):222–8.
93. Shanafelt TD, Raymond M, Horn L, Moynihan T, Collichio F, Chew H, et al. Oncology Fellows' Career Plans, Expectations, and Well-Being: Do Fellows Know What They Are Getting Into? *J Clin Oncol*. 2014;32(27 PG-2991-+):2991–+.
94. Simpkin AL, Khan A, West DC, Garcia BM, Sectish TC, Spector ND, et al. Stress From Uncertainty and Resilience Among Depressed and Burned Out Residents: A Cross-Sectional Study. *Acad Pediatr*. 2018;(PG-).
95. Trockel M, Bohman B, Lesure E, Hamidi MS, Welle D, Roberts L, et al. A Brief Instrument to Assess Both Burnout and Professional Fulfillment in Physicians: Reliability and Validity, Including Correlation with Self-Reported Medical Errors, in a Sample of Resident and Practicing Physicians. *Acad Psychiatry*. 2018;42(1 PG-11-24):11–24.
96. van Vendeloo SN, Brand PLP, Verheyen CCPM. Burnout and quality of life among orthopaedic trainees in a modern educational programme: importance of the learning climate. *Bone Joint J*. 2014;96-B(8 PG-1133-8):1133–8.

Appendix to: Naji L, Singh B, Shah A, et al. Global prevalence of burnout among postgraduate medical trainees: a systematic review and meta-regression.

*CMAJ Open* 2021. DOI:10.9778/cmajo.20200068. Copyright © 2021 The Author(s) or their employer(s).

To receive this resource in an accessible format, please contact us at [cmajgroup@cmaj.ca](mailto:cmajgroup@cmaj.ca).

97. Prins JT, Hoekstra-Weebers J, van de Wiel HBM, Gazendam-Donofrio SM, Sprangers F, Jaspers FCA. Burnout among Dutch medical residents. *Int J Behav Med.* 2007;14(3 PG-119-125):119–25.
98. Prins JT, Hoekstra-Weebers JEHM, Gazendam-Donofrio SM, Dillingh GS, Bakker AB, Huisman M, et al. Burnout and engagement among resident doctors in the Netherlands: a national study. *Med Educ.* 2010;44(3 PG-236-47):236–47.
99. van der Wal RAB, Bucx MJL, Hendriks JCM, Scheffer GJ, Prins JB. Psychological distress, burnout and personality traits in Dutch anaesthesiologists A survey. *Eur J Anaesthesiol.* 2016;33(3 PG-179-186):179–86.
100. van Vendeloo SN, Prins DJ, Verheyen C, Prins JT, van den Heijkant F, van der Heijden FMM, et al. The learning environment and resident burnout: a national study. *Perspect Med Educ.* 2018;7(2 PG-120-125):120–5.
101. van Vendeloo SN, Godderis L, Brand PLP, Verheyen K, Rowell SA, Hoekstra H. Resident burnout: evaluating the role of the learning environment. *Bmc Med Educ.* 2018;18(PG-).
102. Block L, Wu AW, Feldman L, Yeh H-C, Desai S V. Residency schedule, burnout and patient care among first-year residents. *Postgrad Med J.* 2013;89(1055 PG-495-500):495–500.
103. Lebares CC, Guvva E V, Ascher NL, O’Sullivan PS, Harris HW, Epel ES. Burnout and Stress Among US Surgery Residents: Psychological Distress and Resilience. *J Am Coll Surg.* 2018;226(1 PG-80-90):80–90.
104. Shakir HJ, McPheeters MJ, Shallwani H, Pittari JE, Reynolds RM. The Prevalence of Burnout Among US Neurosurgery Residents. *Neurosurgery.* 2017;(PG-).
105. Huggard P, Dixon R. “Tired of caring”: The impact of caring on resident doctors. *Australas J Disaster Trauma Stud.* 2011;2011(3 PG-105-111):105–11.
106. Low JM, Tan MY, See KC, Aw MM. Sleep, activity and fatigue reported by postgraduate year 1 residents: a prospective cohort study comparing the effects of night-float versus traditional overnight on-call. *Singapore Med J.* 2018;(PG-).
107. Markwell AL, Wainer Z. The health and wellbeing of junior doctors: insights from a national survey. *Med J Aust.* 2009;191(8 PG-441-4):441–4.
108. Cooke GP, Doust JA, Steele MC. A survey of resilience, burnout, and tolerance of uncertainty in Australian general practice registrars. *BMC Med Educ.* 2013;13(PG-2):2.
109. Kealy D, Halli P, Ogrodniczuk JS, Hadjipavlou G. Burnout among Canadian Psychiatry Residents: A National Survey. *Can J Psychiatry.* 2016;61(11 PG-732-736):732–6.
110. Lambden JP, Chamberlin P, Kozlov E, Lief L, Berlin DA, Pelissier LA, et al. Association of Perceived Futile or Potentially Inappropriate Care With Burnout and Thoughts of Quitting Among Health-Care Providers. *Am J Hosp Palliat Care.* 2018;(PG-1049909118792517):1049909118792517.
111. Leach PK, Nygaard RM, Chipman JG, Brunsvold ME, Marek AP. Impostor Phenomenon and Burnout in General

Appendix to: Naji L, Singh B, Shah A, et al. Global prevalence of burnout among postgraduate medical trainees: a systematic review and meta-regression.

*CMAJ Open* 2021. DOI:10.9778/cmajo.20200068. Copyright © 2021 The Author(s) or their employer(s).

To receive this resource in an accessible format, please contact us at [cmajgroup@cmaj.ca](mailto:cmajgroup@cmaj.ca).

- Surgeons and General Surgery Residents. *J Surg Educ*. 2018;(PG-).
112. Raviola G, Machoki M, Mwaikambo E, Good MJD. HIV, disease plague, demoralization and "burnout": resident experience of the medical profession in Nairobi, Kenya. *Cult Med Psychiatry*. 2002 Mar;26(1):55–86.
  113. Robertson SL, Robinson MD, Reid A. Electronic Health Record Effects on Work-Life Balance and Burnout Within the I3 Population Collaborative. *J Grad Med Educ*. 2017;9(4 PG-479-484):479–84.
  114. Schweitzer B. Stress and burnout in junior doctors. *S Afr Med J*. 1994;84(6 PG-352-4):352–4.
